# Supplementary material for: First Genome-Based Characterisation and Staphylococcal Enterotoxin Production Ability of Methicillin-Susceptible and Methicillin-Resistant Staphylococcus aureus Strains Isolated from Ready-to-Eat Foods in Algiers (Algeria)
Source: MDPI journal article supplement (doi:10.3390/toxins14110731), 2022-10-25
Supplement: s1 [file s1]

**Supplementary Table S1.** Genomic features of the *S. aureus* strains sequenced in this study

| Isolate     | Genome size (bp) | GC (%) | N. of contigs | Completeness % (essential genes found) | Quality           | Contig N50 (bp) | Genes (total) | Genes (coding) | Coding density | Genes (RNA) | rRNAs                     | tRNAs | ncRNAs | Pseudo Genes (total) |
|-------------|------------------|--------|---------------|----------------------------------------|-------------------|-----------------|---------------|----------------|----------------|-------------|---------------------------|-------|--------|----------------------|
| <b>SA01</b> | 2,702,948        | 32.69  | 27            | 99.1%                                  | 80.1% (excellent) | 211,213         | 2,657         | 2,557          | 83.99%         | 42          | 1, 1, 1<br>(5S, 16S, 23S) | 35    | 4      | 58                   |
| <b>SA02</b> | 2,794,901        | 32.73  | 29            | 95.5%                                  | 77.5% (high)      | 213,609         | 2,780         | 2,654          | 84.11%         | 42          | 2, 1, 1<br>(5S, 16S, 23S) | 34    | 4      | 84                   |
| <b>SA04</b> | 2,785,376        | 32.69  | 17            | 99.1%                                  | 80.1% (excellent) | 730,703         | 2,765         | 2,648          | 83.86%         | 55          | 1, 4, 1<br>(5S, 16S, 23S) | 45    | 4      | 62                   |
| <b>SA07</b> | 2,666,473        | 32.67  | 31            | 99.1%                                  | 80.1% (excellent) | 215,162         | 2,601         | 2,502          | 83.71%         | 43          | 2, 1, 1<br>(5S, 16S, 23S) | 35    | 4      | 56                   |
| <b>SA08</b> | 2,769,312        | 32.67  | 20            | 99.1%                                  | 80.1% (excellent) | 308,007         | 2,768         | 2,645          | 83.86%         | 55          | 2, 1, 2<br>(5S, 16S, 23S) | 46    | 4      | 68                   |
| <b>SA10</b> | 2,762,907        | 32.67  | 34            | 99.1%                                  | 80.1% (excellent) | 172,101         | 2,697         | 2,576          | 83.83%         | 55          | 1, 2, 1<br>(5S, 16S, 23S) | 47    | 4      | 66                   |
| <b>SA18</b> | 2,740,622        | 32.70  | 28            | 99.1%                                  | 80.1% (excellent) | 286,872         | 2,721         | 2,607          | 84.06%         | 44          | 1, 2, 2<br>(5S, 16S, 23S) | 35    | 4      | 70                   |
| <b>SA20</b> | 2,759,779        | 32.56  | 33            | 99.1%                                  | 80.1% (excellent) | 284,374         | 2,712         | 2,595          | 83.59%         | 34          | 2, 1, 1<br>(5S, 16S, 23S) | 34    | 4      | 75                   |
| <b>SA24</b> | 2,710,202        | 32.67  | 31            | 99.1%                                  | 80.1% (excellent) | 212,794         | 2,667         | 2,575          | 83.97%         | 44          | 2, 1, 2<br>(5S, 16S, 23S) | 35    | 4      | 48                   |
| <b>SA46</b> | 2,811,261        | 32.78  | 43            | 99.1%                                  | 80.1% (excellent) | 248,046         | 2,804         | 2,698          | 84.27%         | 44          | 1, 2, 1<br>(5S, 16S, 23S) | 36    | 4      | 62                   |
| <b>SA51</b> | 2,776,461        | 32.70  | 35            | 99.1%                                  | 80.1% (excellent) | 209,034         | 2,765         | 2,659          | 84.06%         | 44          | 2, 1, 1<br>(5S, 16S, 23S) | 36    | 4      | 62                   |
| <b>SA82</b> | 2,726,122        | 32.70  | 40            | 99.1%                                  | 80.1% (excellent) | 150,980         | 2,690         | 2,556          | 84.05%         | 55          | 2, 1, 3<br>(5S, 16S, 23S) | 45    | 4      | 79                   |
