# Supplementary material for: First Genome-Based Characterisation and Staphylococcal Enterotoxin Production Ability of Methicillin-Susceptible and Methicillin-Resistant Staphylococcus aureus Strains Isolated from Ready-to-Eat Foods in Algiers (Algeria)
Source: MDPI journal article supplement (doi:10.3390/toxins14110731), 2022-10-25
Supplement: s1 [file s1]

**Supplementary Table S3.** Spa typing of *S. aureus* strains

|      | spa<br>Type | Repeats                          | Contig                              | Position      | Orientation |
|------|-------------|----------------------------------|-------------------------------------|---------------|-------------|
| SA01 | t084        | 07-23-12-34-34-12-12-23-02-12-23 | NODE_8_length_118714_cov_88.696747  | 52873-53174   | minus       |
| SA02 | t002        | 26-23-17-34-17-20-17-12-17-16    | NODE_1_length_533168_cov_112.199420 | 502749-503026 | minus       |
| SA04 | t127        | 07-23-21-16-34-33-13             | NODE_2_length_730703_cov_73.732725  | 346069-346274 | minus       |
| SA07 | t094        | 07-23-12-34-34-12-12-23          | NODE_8_length_146928_cov_75.988083  | 139442-139671 | plus        |
| SA08 | t078        | 04-21-12-41-20-17-12-12-17       | NODE_4_length_308007_cov_76.643097  | 144219-144472 | plus        |
| SA10 | t4679       | 04-13-20-17-12-17-17             | NODE_3_length_313697_cov_80.644675  | 247489-247694 | minus       |
| SA18 | t9432       | 26-23-21-17-34-34-34-33-34       | NODE_2_length_557737_cov_98.654831  | 144097-144350 | plus        |
| SA20 | t2953       | 11-12-21-17-34-24-34-22-25-25    | NODE_10_length_94764_cov_98.480647  | 41304-41581   | plus        |
| SA24 | t3092       | 07-23-12-21-12-17-20-17-12-17    | NODE_1_length_446589_cov_97.377358  | 306504-306781 | minus       |
| SA46 | t044        | 07-23-12-34-34-33-34             | NODE_7_length_183493_cov_99.007458  | 139502-139707 | plus        |
| SA51 | t002        | 26-23-17-34-17-20-17-12-17-16    | NODE_1_length_511254_cov_83.330293  | 367765-368042 | minus       |
| SA82 | t223        | 26-23-13-23-05-17-25-17-25-16-28 | NODE_17_length_45595_cov_46.844875  | 15640-15941   | minus       |
