# Supplementary material for: First Genome-Based Characterisation and Staphylococcal Enterotoxin Production Ability of Methicillin-Susceptible and Methicillin-Resistant Staphylococcus aureus Strains Isolated from Ready-to-Eat Foods in Algiers (Algeria)
Source: MDPI journal article supplement (doi:10.3390/toxins14110731), 2022-10-25
Supplement: s1 [file s1]

**Supplementary Table S6.** Roary statistics

|                 |                          |      |
|-----------------|--------------------------|------|
| Core genes      | (99% <= strains <= 100%) | 1596 |
| Soft core genes | (95% <= strains < 99%)   | 261  |
| Shell genes     | (15% <= strains < 95%)   | 1323 |
| Cloud genes     | (0% <= strains < 15%)    | 4357 |
| Total genes     | (0% <= strains <= 100%)  | 7537 |
