# Supplementary material for: First Genome-Based Characterisation and Staphylococcal Enterotoxin Production Ability of Methicillin-Susceptible and Methicillin-Resistant Staphylococcus aureus Strains Isolated from Ready-to-Eat Foods in Algiers (Algeria)
Source: MDPI journal article supplement (doi:10.3390/toxins14110731), 2022-10-25
Supplement: s1 [file s1]

**Supplementary Table S2.** Allelic profile and MLST of the sequenced *S. aureus* strains

| <b>strain</b> | <b><i>arcC</i></b> | <b><i>aroE</i></b> | <b><i>glpF</i></b> | <b><i>gmK</i></b> | <b><i>pta</i></b> | <b><i>tpi</i></b> | <b><i>yqil</i></b> | <b>ST</b>         |
|---------------|--------------------|--------------------|--------------------|-------------------|-------------------|-------------------|--------------------|-------------------|
| SA01          | 13                 | 13                 | 1                  | 1                 | 12                | 11                | 13                 | 15                |
| SA02          | 1                  | 4                  | 1                  | 4                 | 12                | 1                 | 10                 | 5                 |
| SA04          | 1                  | 1                  | 1                  | 1                 | 1                 | 1                 | 1                  | 1                 |
| SA07          | 13                 | 1025 <sup>a</sup>  | 1                  | 1                 | 12                | 11                | 13                 | 7199 <sup>b</sup> |
| SA08          | 4                  | 1                  | 4                  | 1                 | 5                 | 5                 | 4                  | 25                |
| SA10          | 3                  | 1                  | 14                 | 15                | 11                | 19                | 3                  | 101               |
| SA18          | 3                  | 1                  | 1                  | 1                 | 1                 | 5                 | 3                  | 97                |
| SA20          | 3                  | 3                  | 1                  | 1                 | 4                 | 4                 | 3                  | 8                 |
| SA24          | 1                  | 4                  | 1                  | 8                 | 4                 | 4                 | 954 <sup>a</sup>   | 7200 <sup>b</sup> |
| SA46          | 1                  | 3                  | 1                  | 14                | 11                | 51                | 10                 | 80                |
| SA51          | 1                  | 4                  | 1                  | 4                 | 12                | 1                 | 10                 | 5                 |
| SA82          | 7                  | 6                  | 1                  | 5                 | 8                 | 8                 | 6                  | 22                |

<sup>a</sup>Novel allele; <sup>b</sup>Novel ST.
