# Supplementary material for: First Genome-Based Characterisation and Staphylococcal Enterotoxin Production Ability of Methicillin-Susceptible and Methicillin-Resistant Staphylococcus aureus Strains Isolated from Ready-to-Eat Foods in Algiers (Algeria)
Source: Toxins (Basel). 2022 Oct 25;14(11):731. doi: 10.3390/toxins14110731 (PMC9694651; doi:10.3390/toxins14110731)
Supplement: Supplementary file 1 [file toxins-14-00731-s001.zip]

Archive with 10 entries (10 files):
- Supplementary Fig. S1_Pan-genome.pdf
- Supplementary Fig.2_egc.pdf
- Supplementary Table S1_Genomic features.pdf
- Supplementary Table S2_MLST allelic profile.pdf
- Supplementary Table S3_spa_typing.pdf
- Supplementary Table S4_revised.xlsx
- Supplementary Table S5_ANI.xlsx
- Supplementary Table S6_Roary statistics.pdf
- Supplementary Table S7_se and sel genes_revised_1.xlsx
- Supplementary Table S8_Virulence determinants.xlsx
