# Supplementary material for: First Genome-Based Characterisation and Staphylococcal Enterotoxin Production Ability of Methicillin-Susceptible and Methicillin-Resistant Staphylococcus aureus Strains Isolated from Ready-to-Eat Foods in Algiers (Algeria)
Source: Toxins (Basel). 2022 Oct 25;14(11):731. doi: 10.3390/toxins14110731 (PMC9694651; doi:10.3390/toxins14110731)
Supplement: Supplementary file 1 [file toxins-14-00731-s001.zip › Supplementary Table S4_revised.xlsx]

## Sheet: Foglio1
Supplementary Table S4. List of S. aureus strains used in this study
Strain	MLST	ST	BioProject Accession	BioSample Accession	GenBank Accessions	Isolation Source	S	Isolation Country	O	Note
Staphylococcus aureus subsp. aureus DSM 20231	ST8		PRJNA283471	SAMN03651231	CP011526,CP011527	Clinical		na
Staphylococcus aureus Sa12-002	ST1		PRJNA323745	SAMN05188391	MAQH00000000	milk		Australia
Staphylococcus aureus Sa13-001	ST3183		PRJNA323745	SAMN05188392	MAQI00000000	milk		Australia
Staphylococcus aureus Sa13-004	ST133		PRJNA323745	SAMN05188395	MAQL00000000	milk		Australia
Staphylococcus aureus Sa13-003	ST133		PRJNA323745	SAMN05188394	MAQK00000000	milk		Australia
Staphylococcus aureus FORC_040	ST72		PRJNA326817	SAMN05292960	CP016398,CP016399	Pork		South Korea
Staphylococcus aureus 363P	ST5		PRJNA413759	SAMN07765391	PDIT01000000	raw milk		Italy
Staphylococcus aureus 364P	ST7250		PRJNA413759	SAMN07765392	PDIS01000000	raw milk		Italy
Staphylococcus aureus 372P	ST8		PRJNA413759	SAMN07765390	PDIU01000000	raw milk		Italy
Staphylococcus aureus 356P	ST45		PRJNA413759	SAMN07765393	PDIR01000000	raw milk		Italy
Staphylococcus aureus 211P	ST1		PRJNA413759	SAMN07765389	PDIV01000000	raw milk		Italy
Staphylococcus aureus 200P	ST8		PRJNA413759	SAMN07765388	PDIW01000000	raw milk		Italy
Staphylococcus aureus NCTC13552	ST425		PRJEB6403	SAMEA3491693	LR134084	Bulk Milk Tank		United Kingdom
Staphylococcus aureus LBMM3245	ST5		PRJNA450022	SAMN08926794	QBKY01000000	cheese		Austria
Staphylococcus aureus YNSA480	ST6		PRJNA543691	SAMN11775322	VCGQ01000000	food		China
Staphylococcus aureus YNSA394	ST5		PRJNA543691	SAMN11775317	VCGL01000000	food		China
Staphylococcus aureus YNSA389	ST6		PRJNA543691	SAMN11775316	VCGK01000000	food		China
Staphylococcus aureus YNSA195	ST6		PRJNA543691	SAMN11775307	VCGB01000000	food		China
Staphylococcus aureus YNSA186	ST6		PRJNA543691	SAMN11775306	VCGA01000000	food		China
Staphylococcus aureus YNSA516	ST6		PRJNA543691	SAMN11775324	VCGS01000000	food		China
Staphylococcus aureus YNSA521	ST5		PRJNA543691	SAMN11775325	VCGT01000000	food		China
Staphylococcus aureus Lodi10B	ST8		PRJNA531079	SAMN11547599	SZYT01000000	milk		Italy
Staphylococcus aureus Lodi4R	ST97		PRJNA531079	SAMN11547600	SZYV01000000	milk		Italy
Staphylococcus aureus Lodi11bM	ST126		PRJNA531079	SAMN11547601	SZYU01000000	milk		Italy
Staphylococcus aureus 12SJ161	ST338		PRJNA587799	SAMN13219178	WJSS01000000	roast pork		China
Staphylococcus aureus 32800326	ST352		PRJNA609123	SAMN14230767	JAANBS010000007,JAANBS010000008,JAANBS010000009,JAANBS010000010,JAANBS010000011,JAANBS010000012,JAANBS010000013	dairy milk		Canada
Staphylococcus aureus 41012475	ST352		PRJNA609123	SAMN14230763	JAANBW010000010,JAANBW010000011,JAANBW010000012,JAANBW010000013,JAANBW010000014,JAANBW010000015,JAANBW010000016	dairy milk		Canada
Staphylococcus aureus 4255	ST59		PRJNA589244	SAMN13270367	WLAG01000000	food		China
Staphylococcus aureus 1827	ST59		PRJNA589244	SAMN13270370	WLAJ01000000	food		China
Staphylococcus aureus 4272C1	ST59		PRJNA589244	SAMN13270409	WLBW01000000	food		China
Staphylococcus aureus 2223-2	ST59		PRJNA589244	SAMN13270381	WLAU01000000	food		China
Staphylococcus aureus 112-1	ST338		PRJNA589244	SAMN13270369	WLAI01000000	food		China
Staphylococcus aureus 1032	ST59		PRJNA589244	SAMN13270357	WKZW01000000	food		China
Staphylococcus aureus 673	ST59		PRJNA589244	SAMN13270354	WKZT01000000	food		China
Staphylococcus aureus 274	ST59		PRJNA589244	SAMN13270347	WKZM01000000	food		China
Staphylococcus aureus 18SBCL679	ST9		PRJNA633807	SAMN15030285	JABTZS010000005,JABTZS010000006,JABTZS010000007,JABTZS010000008,JABTZS010000009,JABTZS010000010,JABTZS010000011	Mountain goat cheese		Switzerland
Staphylococcus aureus 18SBCL678	ST34		PRJNA633807	SAMN15030284	JABTZT010000001,JABTZT010000010,JABTZT010000100,JABTZT010000101,JABTZT010000102,JABTZT010000103,JABTZT010000104	Ready to eat food		Switzerland
Staphylococcus aureus 18SBCL674	ST45		PRJNA633807	SAMN15030280	JABTZX010000001,JABTZX010000009,JABTZX010000010,JABTZX010000011,JABTZX010000012,JABTZX010000013,JABTZX010000014	Formaggio di Capra		Switzerland
Staphylococcus aureus 18SBCL673	ST45		PRJNA633807	SAMN15030279	JABTZY010000001,JABTZY010000010,JABTZY010000011,JABTZY010000012,JABTZY010000013,JABTZY010000014,JABTZY010000015	Robiola		Switzerland
Staphylococcus aureus 18SBCL671	ST30		PRJNA633807	SAMN15030277	JABUAA010000006,JABUAA010000007,JABUAA010000008,JABUAA010000009,JABUAA010000010,JABUAA010000011,JABUAA010000012	Mountain Cheese		Switzerland
Staphylococcus aureus Nigeria-134	ST121		PRJNA634452	SAMN15166386	JABUZQ010000001,JABUZQ010000002,JABUZQ010000003,JABUZQ010000004,JABUZQ010000005,JABUZQ010000006,JABUZQ010000007	food		Nigeria
Staphylococcus aureus Nigeria-138	ST121		PRJNA634452	SAMN15166387	JABUZR010000001,JABUZR010000002,JABUZR010000003,JABUZR010000004,JABUZR010000005,JABUZR010000006,JABUZR010000007	food		Nigeria
Staphylococcus aureus Nigeria-118	ST121		PRJNA634452	SAMN15166381	JABUZL010000001,JABUZL010000002,JABUZL010000003,JABUZL010000004,JABUZL010000005,JABUZL010000006,JABUZL010000007	food		Nigeria
Staphylococcus aureus Nigeria-119	ST121		PRJNA634452	SAMN15166382	JABUZM010000001,JABUZM010000002,JABUZM010000003,JABUZM010000004,JABUZM010000005,JABUZM010000006,JABUZM010000007	food		Nigeria
Staphylococcus aureus SA02	ST7199		PRJNA712985	SAMN18238087	JAFNJM000000000	ready to eat cooked meat		Algeria		sequenced within this study
Staphylococcus aureus SA04	ST1		PRJNA712985	SAMN18238292	JAFNJN000000000	ready to eat cooked meat		Algeria		sequenced within this study
Staphylococcus aureus SA18	ST97		PRJNA712985	SAMN18238298	JAFNJO000000000	ready to eat pizza		Algeria		sequenced within this study
Staphylococcus aureus SA20	ST8		PRJNA712985	SAMN18238299	JAFNJP000000000	ready to eat cooked meat		Algeria		sequenced within this study
Staphylococcus aureus SA24	ST8		PRJNA712985	SAMN18256839	JAFRED000000000	ready to eat lentil soup		Algeria		sequenced within this study
Staphylococcus aureus SA46	ST80		PRJNA712985	SAMN18238300	JAFNJQ000000000	ready to eat braised beef		Algeria		sequenced within this study
Staphylococcus aureus SA51	ST5		PRJNA712985	SAMN18238305	JAFNJR000000000	ready to eat fermented milk		Algeria		sequenced within this study
Staphylococcus aureus IV5	ST2454		PRJNA737448	SAMN19696399	JAHNVF010000010,JAHNVF010000011,JAHNVF010000012,JAHNVF010000013,JAHNVF010000014,JAHNVF010000015,JAHNVF010000016	milk		India
Staphylococcus aureus K1	ST2459		PRJNA737454	SAMN19696527	JAHNVG010000010,JAHNVG010000011,JAHNVG010000012,JAHNVG010000013,JAHNVG010000014,JAHNVG010000015,JAHNVG010000016	milk		India
Staphylococcus aureus R4	ST398		PRJNA746744	SAMN20239708	JAHVYW010000001,JAHVYW010000010,JAHVYW010000011,JAHVYW010000012,JAHVYW010000013,JAHVYW010000014,JAHVYW010000015	Retail pork		China
Staphylococcus aureus R7	ST398		PRJNA746749	SAMN20239738	JAHVYZ010000001,JAHVYZ010000010,JAHVYZ010000011,JAHVYZ010000012,JAHVYZ010000013,JAHVYZ010000014,JAHVYZ010000015	Retail pork		China
Staphylococcus aureus R6	ST398		PRJNA746748	SAMN20239719	JAHVYY010000001,JAHVYY010000010,JAHVYY010000011,JAHVYY010000012,JAHVYY010000013,JAHVYY010000014,JAHVYY010000015	Retail pork		China
Staphylococcus aureus SA257	ST6		PRJNA734647	SAMN19516069	JAHZUL010000001,JAHZUL010000010,JAHZUL010000011,JAHZUL010000012,JAHZUL010000013,JAHZUL010000014,JAHZUL010000015	Cooked pork		China
Staphylococcus aureus SA236	ST7		PRJNA734647	SAMN19516058	JAHZUC010000001,JAHZUC010000010,JAHZUC010000011,JAHZUC010000012,JAHZUC010000013,JAHZUC010000014,JAHZUC010000015	Cooked chicken		China
Staphylococcus aureus SA07	ST7200		PRJNA712985	SAMN19669428	JAHLTS000000000	ready to eat cooked meat		Algeria		sequenced within this study
Staphylococcus aureus SA10	ST101		PRJNA712985	SAMN19669563	JAHLTU000000000	ready to eat cooked meat		Algeria		sequenced within this study
Staphylococcus aureus SA01	ST15		PRJNA712985	SAMN19669286	JAHLTR000000000	ready to eat potato in sauce		Algeria		sequenced within this study
Staphylococcus aureus SA08	ST25		PRJNA712985	SAMN19669485	JAHLTT000000000	ready to eat cooked meat		Algeria		sequenced within this study
Staphylococcus aureus SA82	ST22		PRJNA712985	SAMN19669674	JAHLTV000000000	ready to eat sautéed beef with potato		Algeria		sequenced within this study
Staphylococcus aureus 10_2016	ST398		PRJNA593524	SAMN15216868	JABWTD010000010,JABWTD010000011,JABWTD010000012,JABWTD010000013,JABWTD010000014,JABWTD010000015,JABWTD010000016	goat milk		Brazil
Staphylococcus aureus 26520_17781-1	ST8		PRJNA599293	SAMN15325369	JAEADK010000001,JAEADK010000010,JAEADK010000011,JAEADK010000012,JAEADK010000013,JAEADK010000014,JAEADK010000015	milk		Italy
Staphylococcus aureus 26520_17600-9	ST8		PRJNA599293	SAMN15325370	JAEADJ010000001,JAEADJ010000010,JAEADJ010000011,JAEADJ010000012,JAEADJ010000013,JAEADJ010000014,JAEADJ010000015	milk		Italy
Staphylococcus aureus 21393	ST97		PRJNA599293	SAMN15325368	JAEADL010000001,JAEADL010000010,JAEADL010000011,JAEADL010000012,JAEADL010000013,JAEADL010000014,JAEADL010000015	milk		Italy
Staphylococcus aureus 24246	ST8		PRJNA599293	SAMN15325366	JAEADN010000001,JAEADN010000010,JAEADN010000011,JAEADN010000012,JAEADN010000013,JAEADN010000014,JAEADN010000015	milk		Italy
Staphylococcus aureus 46930_35018	ST398		PRJNA599293	SAMN15325364	JAEADP010000058,JAEADP010000009,JAEADP010000010,JAEADP010000011,JAEADP010000012,JAEADP010000013,JAEADP010000014	milk		Italy
Staphylococcus aureus 76630	ST398		PRJNA599293	SAMN15325334	JAEAET010000001,JAEAET010000010,JAEAET010000011,JAEAET010000012,JAEAET010000013,JAEAET010000014,JAEAET010000015	cow milk		Italy
Staphylococcus aureus 76635	ST15		PRJNA599293	SAMN15325333	JAEAEU010000001,JAEAEU010000010,JAEAEU010000011,JAEAEU010000012,JAEAEU010000013,JAEAEU010000014,JAEAEU010000015	cow milk		Italy
Staphylococcus aureus KLT6	ST12		PRJNA186656	SAMN02472075	APFH00000000	potato salad		Switzerland
Staphylococcus aureus 2010-60-6063-29	ST398		PRJNA226281	SAMN02391155	JJCI00000000	Chicken broiler meat		Denmark
Staphylococcus aureus 2010-60-7626-19	ST398		PRJNA226282	SAMN02391156	JJCD00000000	Chicken broiler meat		Denmark
Staphylococcus aureus 2011-60-2256-5	ST398		PRJNA226283	SAMN02391157	JJCA00000000	Chicken broiler meat		Denmark
Staphylococcus aureus 09S01694	ST398		PRJNA226309	SAMN02391183	JJEK00000000	Chicken broiler meat		Germany
Staphylococcus aureus 10S00488	ST398		PRJNA226310	SAMN02391184	JJEI00000000	Turkey meat		Germany
Staphylococcus aureus 12S01153	ST398		PRJNA226321	SAMN02391195	JJCY00000000	Turkey meat		Germany
Staphylococcus aureus 12S01399	ST398		PRJNA226322	SAMN02391196	JJCX00000000	Turkey meat		Germany
Staphylococcus aureus Tur-16	ST398		PRJNA226326	SAMN02391200	JIWA00000000	Turkey meat		Germany
Staphylococcus aureus Sau 194	ST398		PRJNA226335	SAMN02391209	JIWL00000000	Cheese (mozzarella)		Italy
Staphylococcus aureus 12464	ST398		PRJNA226369	SAMN02391243	JJDD00000000	Bodily fluid		Italy
Staphylococcus aureus M267-1	ST398		PRJNA226395	SAMN02391269	JIXW00000000	Chicken broiler meat		Netherlands
Staphylococcus aureus M357	ST398		PRJNA226396	SAMN02391270	JIXV00000000	Chicken broiler meat		Netherlands
Staphylococcus aureus M457-1	ST398		PRJNA226397	SAMN02391271	JIXU00000000	Turkey meat		Netherlands
Staphylococcus aureus M520-1	ST398		PRJNA226398	SAMN02391272	JIXT00000000	Pork		Netherlands
Staphylococcus aureus C1891	ST398		PRJNA226411	SAMN02391285	JIZN00000000	food		Spain
Staphylococcus aureus C1894	ST398		PRJNA226412	SAMN02391286	JIZM00000000	food		Spain
Staphylococcus aureus Chi-4	ST398		PRJNA226503	SAMN02391375	JIYU00000000	Chicken bodily fluid		Germany
Staphylococcus aureus Chi-10	ST398		PRJNA226504	SAMN02391376	JIYV00000000	Chicken bodily fluid		Austria
Staphylococcus aureus Chi-8	ST398		PRJNA226505	SAMN02391377	JIYT00000000	Chicken bodily fluid		Germany
Staphylococcus aureus Tur-20	ST398		PRJNA226506	SAMN02391378	JIVZ00000000	Turkey bodily fluid		Germany
Staphylococcus aureus Tur-22	ST398		PRJNA226507	SAMN02391379	JIVY00000000	Turkey bodily fluid		Italy
Staphylococcus aureus Tur-6	ST398		PRJNA226509	SAMN02391381	JIVV00000000	Turkey bodily fluid		Germany
Staphylococcus aureus Tur-15	ST398		PRJNA226511	SAMN02391383	JIWB00000000	Turkey bodily fluid		Austria
Staphylococcus aureus subsp. aureus SA-006	ST700		PRJNA268074	SAMN03202661	JXHY01000000	food		Switzerland
Staphylococcus aureus subsp. aureus SA-022	ST30		PRJNA268479	SAMN03219984	JXHZ01000000	food		Switzerland
