# Supplementary material for: First Genome-Based Characterisation and Staphylococcal Enterotoxin Production Ability of Methicillin-Susceptible and Methicillin-Resistant Staphylococcus aureus Strains Isolated from Ready-to-Eat Foods in Algiers (Algeria)
Source: Toxins (Basel). 2022 Oct 25;14(11):731. doi: 10.3390/toxins14110731 (PMC9694651; doi:10.3390/toxins14110731)
Supplement: Supplementary file 1 [file toxins-14-00731-s001.zip › Supplementary Table S5_ANI.xlsx]

## Sheet: ANI matrix
Supplementary Table S5. ANI values among S. aureus strains
	S. aureus SA-006	S. aureus NCTC13552	S. aureus Sa13-004	S. aureus Sa13-003	S. aureus Nigeria-134	S. aureus Nigeria-119	S. aureus Nigeria-138	S. aureus Nigeria-118	S. aureus 12SJ161	S. aureus 112-1	S. aureus 2223-2	S. aureus 673	S. aureus 274	S. aureus 1032	S. aureus 4255	S. aureus 4272C1	S. aureus 1827	S. aureus SA04	S. aureus Sa12-002	S. aureus 211P	S. aureus SA07	S. aureus 76635	S. aureus SA01	S. aureus SA46	S. aureus KLT6	S. aureus SA236	S. aureus Lodi11bM	S. aureus SA08	S. aureus SA10	S. aureus SA24	S. aureus FORC_040	S. aureus 364P	S. aureus 18SBCL679	S. aureus IV5	S. aureus YNSA186	S. aureus YNSA389	S. aureus YNSA195	S. aureus YNSA480	S. aureus YNSA516	S. aureus SA257	S. aureus 21393	S. aureus Sa13-001	S. aureus Lodi4R	S. aureus K1	S. aureus SA18	S. aureus 41012475	S. aureus 32800326	S. aureus SA82	S. aureus Lodi10B
S. aureus SA-006	100	99.0108	99.0028	98.9536	99.0705	99.0733	99.0769	99.0701	98.6869	98.6817	98.6368	98.6253	98.6945	98.6876	98.6638	98.6782	98.6079	98.0239	98.0998	98.0786	98.1287	98.0795	98.0779	98.0587	98.1294	98.0662	98.0696	98.0605	98.0821	98.0641	98.0975	98.0652	98.0635	98.071	98.0798	98.0731	98.0741	98.0738	98.0983	98.0572	98.0784	98.085	98.056	98.1323	98.1256	98.0643	98.0543	97.8304	98.0431
S. aureus NCTC13552	99.0108	100	99.1299	99.1342	98.9653	99.0005	98.9729	98.9912	98.6325	98.617	98.6259	98.6227	98.6388	98.6594	98.6802	98.6759	98.6632	98.0762	98.0471	98.0471	98.031	98.0646	98.0578	98.0099	98.0713	98.0016	98.0673	98.0968	98.118	98.0979	98.0782	98.0405	98.0621	98.0566	98.0953	98.0515	98.0615	98.0935	98.0528	98.1402	98.0667	98.0586	98.0746	98.0584	98.0841	98.0584	98.0743	97.8332	98.0129
S. aureus Sa13-004	99.0028	99.1299	100	99.9166	98.983	98.989	98.9796	98.9914	98.6579	98.6812	98.6345	98.652	98.6915	98.6639	98.6601	98.687	98.6445	98.0699	98.0754	98.0555	98.0803	98.1241	98.0699	98.0231	98.1089	98.0304	98.0941	98.0487	98.1109	98.0655	98.0401	98.0864	98.0519	98.0505	98.0793	98.0349	98.0362	98.0631	98.0554	98.0983	98.0667	98.0797	98.1054	98.105	98.0604	98.0605	98.0745	97.8815	98.0441
S. aureus Sa13-003	98.9536	99.1342	99.9166	100	98.978	98.9638	98.9713	98.9739	98.6507	98.6693	98.5745	98.6313	98.6846	98.6644	98.6809	98.6547	98.6027	97.9443	98.052	97.9997	98.0579	98.0773	98.0752	97.9953	98.0539	98.0129	98.0243	98.043	98.07	98.0348	98.0944	98.0825	98.0561	98.043	98.1076	97.9951	97.9804	98.0179	98.035	98.0583	98.0379	98.0546	98.004	98.1149	98.046	98.0745	98.0384	97.855	98.0296
S. aureus Nigeria-134	99.0705	98.9653	98.983	98.978	100	100	99.9948	99.9939	98.6768	98.6565	98.6335	98.6683	98.6934	98.6567	98.6824	98.6833	98.6411	98.1109	98.099	98.1026	98.1005	98.0694	98.0879	98.0751	98.0987	98.0877	98.1153	98.1302	98.1449	98.1044	98.0942	98.0957	98.1106	98.0385	98.0956	98.0955	98.0516	98.046	98.0568	98.0685	98.0805	98.1124	98.0665	98.062	98.0854	98.0536	98.0658	97.8524	98.0681
S. aureus Nigeria-119	99.0733	99.0005	98.989	98.9638	100	100	100	100	98.6629	98.6794	98.6197	98.6514	98.6699	98.6885	98.6964	98.7142	98.6378	98.1018	98.135	98.0606	98.0783	98.1068	98.1161	98.1034	98.1214	98.0896	98.1007	98.1007	98.1433	98.0705	98.1133	98.0439	98.0879	98.0431	98.0716	98.0966	98.0295	98.0924	98.0628	98.0898	98.0682	98.0764	98.0644	98.1011	98.0874	98.0491	98.0867	97.8987	98.0288
S. aureus Nigeria-138	99.0769	98.9729	98.9796	98.9713	99.9948	100	100	99.9949	98.6405	98.6924	98.6241	98.6602	98.6559	98.6804	98.6912	98.7135	98.6245	98.0968	98.1111	98.0787	98.0597	98.1081	98.1309	98.1178	98.1275	98.0698	98.1098	98.1114	98.1392	98.0742	98.1004	98.0478	98.0618	98.0225	98.1048	98.0613	98.047	98.085	98.0506	98.0817	98.0827	98.068	98.0736	98.0943	98.0715	98.041	98.08	97.8766	98.0518
S. aureus Nigeria-118	99.0701	98.9912	98.9914	98.9739	99.9939	100	99.9949	100	98.6555	98.7018	98.6217	98.642	98.65	98.6868	98.7008	98.7021	98.6323	98.092	98.1078	98.0701	98.0531	98.1158	98.1201	98.1159	98.1204	98.0742	98.1023	98.1104	98.134	98.0872	98.1283	98.0522	98.0853	98.0426	98.0906	98.0725	98.0548	98.0786	98.0571	98.0885	98.0835	98.0756	98.0564	98.1013	98.0936	98.0563	98.0897	97.9072	98.0296
S. aureus 12SJ161	98.6869	98.6325	98.6579	98.6507	98.6768	98.6629	98.6405	98.6555	100	99.9812	99.9773	99.9477	99.9773	99.9554	99.9655	99.962	99.9468	98.0483	98.0992	98.0713	98.0662	98.092	98.0618	98.1382	98.1008	98.0574	98.0688	98.066	98.081	98.1165	98.0881	98.08	98.1241	98.1214	98.1399	98.097	98.0793	98.1072	98.1053	98.1193	98.0912	98.0839	98.0773	98.1245	98.0901	98.0494	98.0547	97.7934	98.0715
S. aureus 112-1	98.6817	98.617	98.6812	98.6693	98.6565	98.6794	98.6924	98.7018	99.9812	100	99.9718	99.9666	99.9694	99.9739	99.9748	99.9745	99.9735	98.0805	98.0994	98.1409	98.1004	98.0694	98.1173	98.1255	98.1378	98.088	98.1171	98.0896	98.1256	98.1418	98.1323	98.1086	98.1286	98.0986	98.1016	98.123	98.1362	98.1151	98.1242	98.097	98.0953	98.1117	98.0827	98.0816	98.0969	98.0829	98.1101	97.8392	98.0744
S. aureus 2223-2	98.6368	98.6259	98.6345	98.5745	98.6335	98.6197	98.6241	98.6217	99.9773	99.9718	100	99.9606	99.9675	99.938	99.9577	99.9589	99.9524	98.0507	98.1346	98.0519	98.1118	98.0764	98.0802	98.1211	98.1321	98.027	98.0775	98.1135	98.1246	98.0971	98.1088	98.0826	98.1009	98.0794	98.1056	98.1111	98.1426	98.1233	98.109	98.0743	98.0965	98.1194	98.0685	98.0886	98.0807	98.1065	98.0831	97.8699	98.0555
S. aureus 673	98.6253	98.6227	98.652	98.6313	98.6683	98.6514	98.6602	98.642	99.9477	99.9666	99.9606	100	99.9537	99.9545	99.9598	99.9608	99.9097	98.1066	98.1007	98.0936	98.0653	98.0758	98.0777	98.1247	98.0899	98.0709	98.1204	98.0633	98.1265	98.1001	98.1181	98.0885	98.1128	98.073	98.1042	98.1086	98.1122	98.0883	98.0961	98.0995	98.0781	98.1018	98.0565	98.068	98.1074	98.0594	98.0822	97.8306	98.0562
S. aureus 274	98.6945	98.6388	98.6915	98.6846	98.6934	98.6699	98.6559	98.65	99.9773	99.9694	99.9675	99.9537	100	99.9724	99.9741	99.9733	99.9666	98.0878	98.1427	98.0743	98.0668	98.1276	98.1026	98.1268	98.1203	98.0774	98.0928	98.1054	98.1112	98.1331	98.1234	98.0961	98.1541	98.1242	98.1153	98.1245	98.1162	98.1074	98.1052	98.1273	98.1122	98.092	98.0795	98.0777	98.1062	98.1003	98.1037	97.831	98.0256
S. aureus 1032	98.6876	98.6594	98.6639	98.6644	98.6567	98.6885	98.6804	98.6868	99.9554	99.9739	99.938	99.9545	99.9724	100	99.9696	99.9704	99.9631	98.0644	98.0928	98.0847	98.0872	98.0732	98.0692	98.1219	98.1061	98.1256	98.1	98.087	98.1057	98.116	98.128	98.1029	98.1269	98.0701	98.0978	98.1095	98.0991	98.1236	98.1062	98.1174	98.1046	98.1369	98.1244	98.0774	98.1088	98.1073	98.084	97.8108	98.0809
S. aureus 4255	98.6638	98.6802	98.6601	98.6809	98.6824	98.6964	98.6912	98.7008	99.9655	99.9748	99.9577	99.9598	99.9741	99.9696	100	99.9851	99.9553	98.0792	98.1372	98.121	98.1109	98.0591	98.1067	98.1398	98.1204	98.1342	98.1037	98.1197	98.0827	98.1381	98.1248	98.1147	98.1173	98.1329	98.09	98.1466	98.0901	98.1246	98.0842	98.0766	98.0982	98.1298	98.074	98.1028	98.0871	98.1208	98.1295	97.8401	98.0577
S. aureus 4272C1	98.6782	98.6759	98.687	98.6547	98.6833	98.7142	98.7135	98.7021	99.962	99.9745	99.9589	99.9608	99.9733	99.9704	99.9851	100	99.9537	98.0853	98.1149	98.1138	98.0723	98.076	98.0619	98.1364	98.1038	98.1388	98.087	98.0973	98.0953	98.1286	98.1134	98.1029	98.1505	98.1076	98.1018	98.143	98.1097	98.1152	98.104	98.0949	98.0879	98.0981	98.0929	98.0784	98.107	98.0904	98.1332	97.859	98.0635
S. aureus 1827	98.6079	98.6632	98.6445	98.6027	98.6411	98.6378	98.6245	98.6323	99.9468	99.9735	99.9524	99.9097	99.9666	99.9631	99.9553	99.9537	100	98.0449	98.0896	98.1054	98.0471	98.0866	98.0417	98.083	98.1255	98.1014	98.0763	98.0425	98.0217	98.1333	98.099	98.0644	98.1028	98.0777	98.0634	98.0714	98.0743	98.0978	98.0678	98.0943	98.1037	98.0925	98.065	98.0807	98.0813	98.0158	98.0557	97.7824	98.0569
S. aureus SA04	98.0239	98.0762	98.0699	97.9443	98.1109	98.1018	98.0968	98.092	98.0483	98.0805	98.0507	98.1066	98.0878	98.0644	98.0792	98.0853	98.0449	100	99.9527	99.9221	99.1712	99.2068	99.1849	99.1378	99.1272	99.0379	99.064	99.078	99.0024	99.145	99.1266	99.1306	99.1634	99.1553	99.1647	99.0985	99.1329	99.12	99.1173	99.1311	99.0901	99.1247	99.0808	99.1153	99.1057	99.0726	99.0912	98.3173	99.1246
S. aureus Sa12-002	98.0998	98.0471	98.0754	98.052	98.099	98.135	98.1111	98.1078	98.0992	98.0994	98.1346	98.1007	98.1427	98.0928	98.1372	98.1149	98.0896	99.9527	100	99.9435	99.1841	99.1602	99.181	99.1856	99.1486	99.1068	99.1052	99.1123	99.0831	99.1621	99.1234	99.1572	99.1661	99.1525	99.1464	99.1218	99.1252	99.1323	99.13	99.1483	99.0966	99.0992	99.1308	99.095	99.1196	99.0918	99.0877	98.2722	99.1315
S. aureus 211P	98.0786	98.0471	98.0555	97.9997	98.1026	98.0606	98.0787	98.0701	98.0713	98.1409	98.0519	98.0936	98.0743	98.0847	98.121	98.1138	98.1054	99.9221	99.9435	100	99.1551	99.1871	99.1577	99.112	99.1337	99.0419	99.0437	99.0924	99.0231	99.1439	99.149	99.0818	99.1506	99.1331	99.1227	99.0677	99.0617	99.0755	99.0742	99.1285	99.0977	99.1083	99.0816	99.0985	99.1075	99.0874	99.0973	98.3426	99.113
S. aureus SA07	98.1287	98.031	98.0803	98.0579	98.1005	98.0783	98.0597	98.0531	98.0662	98.1004	98.1118	98.0653	98.0668	98.0872	98.1109	98.0723	98.0471	99.1712	99.1841	99.1551	100	99.9824	99.9758	99.1355	99.1536	99.0799	99.0837	99.0293	98.9537	99.107	99.0936	99.107	99.1454	99.1551	99.1352	99.1293	99.1017	99.1213	99.1113	99.1188	99.08	99.1011	99.1195	99.1018	99.1216	99.1242	99.115	98.2324	99.1431
S. aureus 76635	98.0795	98.0646	98.1241	98.0773	98.0694	98.1068	98.1081	98.1158	98.092	98.0694	98.0764	98.0758	98.1276	98.0732	98.0591	98.076	98.0866	99.2068	99.1602	99.1871	99.9824	100	99.9771	99.1618	99.1672	99.1059	99.0791	99.0554	99.0063	99.1323	99.0793	99.1524	99.1649	99.1971	99.1249	99.112	99.0994	99.1322	99.1218	99.0824	99.0758	99.1115	99.1397	99.1433	99.1334	99.1189	99.1174	98.2245	99.1512
S. aureus SA01	98.0779	98.0578	98.0699	98.0752	98.0879	98.1161	98.1309	98.1201	98.0618	98.1173	98.0802	98.0777	98.1026	98.0692	98.1067	98.0619	98.0417	99.1849	99.181	99.1577	99.9758	99.9771	100	99.1034	99.1586	99.0931	99.0879	99.0262	98.9574	99.093	99.0909	99.1107	99.1451	99.1254	99.11	99.1051	99.0807	99.104	99.1016	99.1129	99.0724	99.0924	99.1214	99.1037	99.1102	99.094	99.1021	98.2116	99.1379
S. aureus SA46	98.0587	98.0099	98.0231	97.9953	98.0751	98.1034	98.1178	98.1159	98.1382	98.1255	98.1211	98.1247	98.1268	98.1219	98.1398	98.1364	98.083	99.1378	99.1856	99.112	99.1355	99.1618	99.1034	100	99.1514	99.0477	99.0576	99.032	99.0249	99.112	99.1452	99.0862	99.1048	99.0698	99.1547	99.1318	99.1539	99.1463	99.1566	99.1689	99.0948	99.1124	99.1269	99.1281	99.1471	99.1346	99.0904	98.2431	99.1224
S. aureus KLT6	98.1294	98.0713	98.1089	98.0539	98.0987	98.1214	98.1275	98.1204	98.1008	98.1378	98.1321	98.0899	98.1203	98.1061	98.1204	98.1038	98.1255	99.1272	99.1486	99.1337	99.1536	99.1672	99.1586	99.1514	100	99.141	99.0957	99.1181	99.0348	99.1946	99.209	99.157	99.1736	99.1816	99.1811	99.1765	99.1573	99.165	99.1767	99.1707	99.0792	99.1136	99.1058	99.1005	99.1517	99.0949	99.0982	98.2535	99.1242
S. aureus SA236	98.0662	98.0016	98.0304	98.0129	98.0877	98.0896	98.0698	98.0742	98.0574	98.088	98.027	98.0709	98.0774	98.1256	98.1342	98.1388	98.1014	99.0379	99.1068	99.0419	99.0799	99.1059	99.0931	99.0477	99.141	100	99.0568	99.0345	98.9429	99.12	99.1584	99.0868	99.08	99.0698	99.2659	99.2378	99.2161	99.2258	99.2533	99.252	99.0329	99.0258	99.0134	99.0789	99.009	99.0185	99.0207	98.2677	99.054
S. aureus Lodi11bM	98.0696	98.0673	98.0941	98.0243	98.1153	98.1007	98.1098	98.1023	98.0688	98.1171	98.0775	98.1204	98.0928	98.1	98.1037	98.087	98.0763	99.064	99.1052	99.0437	99.0837	99.0791	99.0879	99.0576	99.0957	99.0568	100	99.0409	99.0212	99.1334	99.1196	99.1442	99.16	99.1021	99.1029	99.0957	99.0749	99.0706	99.0669	99.0825	99.1044	99.0915	99.1209	99.1158	99.1228	99.1226	99.1212	98.3268	99.1033
S. aureus SA08	98.0605	98.0968	98.0487	98.043	98.1302	98.1007	98.1114	98.1104	98.066	98.0896	98.1135	98.0633	98.1054	98.087	98.1197	98.0973	98.0425	99.078	99.1123	99.0924	99.0293	99.0554	99.0262	99.032	99.1181	99.0345	99.0409	100	98.9613	99.069	99.06	99.0548	99.1058	99.0863	99.0891	99.0742	99.0599	99.0958	99.0797	99.0827	99.0972	99.0718	99.0656	99.0826	99.086	99.0465	99.0534	98.2274	99.0789
S. aureus SA10	98.0821	98.118	98.1109	98.07	98.1449	98.1433	98.1392	98.134	98.081	98.1256	98.1246	98.1265	98.1112	98.1057	98.0827	98.0953	98.0217	99.0024	99.0831	99.0231	98.9537	99.0063	98.9574	99.0249	99.0348	98.9429	99.0212	98.9613	100	99.0603	99.0338	99.015	99.0594	99.0527	98.9996	98.9887	99.0103	98.9847	98.9885	98.9553	99.0245	99.023	98.9937	99.0346	99.0243	98.9911	99.0211	98.2156	99.0027
S. aureus SA24	98.0641	98.0979	98.0655	98.0348	98.1044	98.0705	98.0742	98.0872	98.1165	98.1418	98.0971	98.1001	98.1331	98.116	98.1381	98.1286	98.1333	99.145	99.1621	99.1439	99.107	99.1323	99.093	99.112	99.1946	99.12	99.1334	99.069	99.0603	100	99.9671	99.141	99.1639	99.1786	99.1466	99.1692	99.1307	99.1492	99.1578	99.1627	99.114	99.1418	99.1214	99.1174	99.1337	99.113	99.0784	98.3045	99.0909
S. aureus FORC_040	98.0975	98.0782	98.0401	98.0944	98.0942	98.1133	98.1004	98.1283	98.0881	98.1323	98.1088	98.1181	98.1234	98.128	98.1248	98.1134	98.099	99.1266	99.1234	99.149	99.0936	99.0793	99.0909	99.1452	99.209	99.1584	99.1196	99.06	99.0338	99.9671	100	99.1494	99.1559	99.191	99.131	99.1232	99.0956	99.1408	99.1111	99.1164	99.0934	99.1301	99.1257	99.134	99.0951	99.0779	99.0968	98.2742	99.0811
S. aureus 364P	98.0652	98.0405	98.0864	98.0825	98.0957	98.0439	98.0478	98.0522	98.08	98.1086	98.0826	98.0885	98.0961	98.1029	98.1147	98.1029	98.0644	99.1306	99.1572	99.0818	99.107	99.1524	99.1107	99.0862	99.157	99.0868	99.1442	99.0548	99.015	99.141	99.1494	100	99.9231	99.8914	99.1681	99.1345	99.132	99.1419	99.1453	99.1301	99.1311	99.1595	99.1568	99.1528	99.1713	99.1542	99.1647	98.3135	99.1042
S. aureus 18SBCL679	98.0635	98.0621	98.0519	98.0561	98.1106	98.0879	98.0618	98.0853	98.1241	98.1286	98.1009	98.1128	98.1541	98.1269	98.1173	98.1505	98.1028	99.1634	99.1661	99.1506	99.1454	99.1649	99.1451	99.1048	99.1736	99.08	99.16	99.1058	99.0594	99.1639	99.1559	99.9231	100	99.901	99.1633	99.147	99.144	99.1668	99.1657	99.15	99.1458	99.1546	99.1359	99.1899	99.1488	99.1849	99.1734	98.2713	99.0955
S. aureus IV5	98.071	98.0566	98.0505	98.043	98.0385	98.0431	98.0225	98.0426	98.1214	98.0986	98.0794	98.073	98.1242	98.0701	98.1329	98.1076	98.0777	99.1553	99.1525	99.1331	99.1551	99.1971	99.1254	99.0698	99.1816	99.0698	99.1021	99.0863	99.0527	99.1786	99.191	99.8914	99.901	100	99.174	99.1259	99.1501	99.1568	99.1427	99.1671	99.1676	99.1756	99.1598	99.1777	99.1766	99.1761	99.172	98.2774	99.1076
S. aureus YNSA186	98.0798	98.0953	98.0793	98.1076	98.0956	98.0716	98.1048	98.0906	98.1399	98.1016	98.1056	98.1042	98.1153	98.0978	98.09	98.1018	98.0634	99.1647	99.1464	99.1227	99.1352	99.1249	99.11	99.1547	99.1811	99.2659	99.1029	99.0891	98.9996	99.1466	99.131	99.1681	99.1633	99.174	100	99.9792	99.9761	99.9775	99.9801	99.9629	99.0897	99.0913	99.0832	99.1239	99.0703	99.0779	99.0811	98.2453	99.0888
S. aureus YNSA389	98.0731	98.0515	98.0349	97.9951	98.0955	98.0966	98.0613	98.0725	98.097	98.123	98.1111	98.1086	98.1245	98.1095	98.1466	98.143	98.0714	99.0985	99.1218	99.0677	99.1293	99.112	99.1051	99.1318	99.1765	99.2378	99.0957	99.0742	98.9887	99.1692	99.1232	99.1345	99.147	99.1259	99.9792	100	99.9492	99.9497	99.9468	99.9673	99.1208	99.12	99.1012	99.1268	99.1015	99.0852	99.0717	98.2453	99.0873
S. aureus YNSA195	98.0741	98.0615	98.0362	97.9804	98.0516	98.0295	98.047	98.0548	98.0793	98.1362	98.1426	98.1122	98.1162	98.0991	98.0901	98.1097	98.0743	99.1329	99.1252	99.0617	99.1017	99.0994	99.0807	99.1539	99.1573	99.2161	99.0749	99.0599	99.0103	99.1307	99.0956	99.132	99.144	99.1501	99.9761	99.9492	100	99.9571	99.9583	99.9595	99.1289	99.0936	99.0866	99.1025	99.0873	99.068	99.0684	98.2406	99.093
S. aureus YNSA480	98.0738	98.0935	98.0631	98.0179	98.046	98.0924	98.085	98.0786	98.1072	98.1151	98.1233	98.0883	98.1074	98.1236	98.1246	98.1152	98.0978	99.12	99.1323	99.0755	99.1213	99.1322	99.104	99.1463	99.165	99.2258	99.0706	99.0958	98.9847	99.1492	99.1408	99.1419	99.1668	99.1568	99.9775	99.9497	99.9571	100	99.9818	99.9648	99.0874	99.1038	99.0777	99.1226	99.0972	99.0609	99.0607	98.2314	99.0889
S. aureus YNSA516	98.0983	98.0528	98.0554	98.035	98.0568	98.0628	98.0506	98.0571	98.1053	98.1242	98.109	98.0961	98.1052	98.1062	98.0842	98.104	98.0678	99.1173	99.13	99.0742	99.1113	99.1218	99.1016	99.1566	99.1767	99.2533	99.0669	99.0797	98.9885	99.1578	99.1111	99.1453	99.1657	99.1427	99.9801	99.9468	99.9583	99.9818	100	99.97	99.0978	99.1157	99.1005	99.1174	99.0782	99.0579	99.0714	98.2129	99.0958
S. aureus SA257	98.0572	98.1402	98.0983	98.0583	98.0685	98.0898	98.0817	98.0885	98.1193	98.097	98.0743	98.0995	98.1273	98.1174	98.0766	98.0949	98.0943	99.1311	99.1483	99.1285	99.1188	99.0824	99.1129	99.1689	99.1707	99.252	99.0825	99.0827	98.9553	99.1627	99.1164	99.1301	99.15	99.1671	99.9629	99.9673	99.9595	99.9648	99.97	100	99.0696	99.0807	99.076	99.0885	99.0968	99.066	99.0899	98.2672	99.0998
S. aureus 21393	98.0784	98.0667	98.0667	98.0379	98.0805	98.0682	98.0827	98.0835	98.0912	98.0953	98.0965	98.0781	98.1122	98.1046	98.0982	98.0879	98.1037	99.0901	99.0966	99.0977	99.08	99.0758	99.0724	99.0948	99.0792	99.0329	99.1044	99.0972	99.0245	99.114	99.0934	99.1311	99.1458	99.1676	99.0897	99.1208	99.1289	99.0874	99.0978	99.0696	100	99.954	99.9503	99.9596	99.9324	99.9295	99.9296	98.2545	99.1147
S. aureusSa13-001	98.085	98.0586	98.0797	98.0546	98.1124	98.0764	98.068	98.0756	98.0839	98.1117	98.1194	98.1018	98.092	98.1369	98.1298	98.0981	98.0925	99.1247	99.0992	99.1083	99.1011	99.1115	99.0924	99.1124	99.1136	99.0258	99.0915	99.0718	99.023	99.1418	99.1301	99.1595	99.1546	99.1756	99.0913	99.12	99.0936	99.1038	99.1157	99.0807	99.954	100	99.9541	99.956	99.9291	99.9227	99.9186	98.251	99.1443
S. aureus Lodi4R	98.056	98.0746	98.1054	98.004	98.0665	98.0644	98.0736	98.0564	98.0773	98.0827	98.0685	98.0565	98.0795	98.1244	98.074	98.0929	98.065	99.0808	99.1308	99.0816	99.1195	99.1397	99.1214	99.1269	99.1058	99.0134	99.1209	99.0656	98.9937	99.1214	99.1257	99.1568	99.1359	99.1598	99.0832	99.1012	99.0866	99.0777	99.1005	99.076	99.9503	99.9541	100	99.9607	99.9343	99.9321	99.9295	98.2673	99.1274
S. aureus K1	98.1323	98.0584	98.105	98.1149	98.062	98.1011	98.0943	98.1013	98.1245	98.0816	98.0886	98.068	98.0777	98.0774	98.1028	98.0784	98.0807	99.1153	99.095	99.0985	99.1018	99.1433	99.1037	99.1281	99.1005	99.0789	99.1158	99.0826	99.0346	99.1174	99.134	99.1528	99.1899	99.1777	99.1239	99.1268	99.1025	99.1226	99.1174	99.0885	99.9596	99.956	99.9607	100	99.9399	99.9283	99.9296	98.2468	99.1375
S. aureus SA18	98.1256	98.0841	98.0604	98.046	98.0854	98.0874	98.0715	98.0936	98.0901	98.0969	98.0807	98.1074	98.1062	98.1088	98.0871	98.107	98.0813	99.1057	99.1196	99.1075	99.1216	99.1334	99.1102	99.1471	99.1517	99.009	99.1228	99.086	99.0243	99.1337	99.0951	99.1713	99.1488	99.1766	99.0703	99.1015	99.0873	99.0972	99.0782	99.0968	99.9324	99.9291	99.9343	99.9399	100	99.907	99.9208	98.259	99.149
S. aureus 41012475	98.0643	98.0584	98.0605	98.0745	98.0536	98.0491	98.041	98.0563	98.0494	98.0829	98.1065	98.0594	98.1003	98.1073	98.1208	98.0904	98.0158	99.0726	99.0918	99.0874	99.1242	99.1189	99.094	99.1346	99.0949	99.0185	99.1226	99.0465	98.9911	99.113	99.0779	99.1542	99.1849	99.1761	99.0779	99.0852	99.068	99.0609	99.0579	99.066	99.9295	99.9227	99.9321	99.9283	99.907	100	99.9868	98.2433	99.12
S. aureus 32800326	98.0543	98.0743	98.0745	98.0384	98.0658	98.0867	98.08	98.0897	98.0547	98.1101	98.0831	98.0822	98.1037	98.084	98.1295	98.1332	98.0557	99.0912	99.0877	99.0973	99.115	99.1174	99.1021	99.0904	99.0982	99.0207	99.1212	99.0534	99.0211	99.0784	99.0968	99.1647	99.1734	99.172	99.0811	99.0717	99.0684	99.0607	99.0714	99.0899	99.9296	99.9186	99.9295	99.9296	99.9208	99.9868	100	98.2391	99.1029
S. aureus SA82	97.8304	97.8332	97.8815	97.855	97.8524	97.8987	97.8766	97.9072	97.7934	97.8392	97.8699	97.8306	97.831	97.8108	97.8401	97.859	97.7824	98.3173	98.2722	98.3426	98.2324	98.2245	98.2116	98.2431	98.2535	98.2677	98.3268	98.2274	98.2156	98.3045	98.2742	98.3135	98.2713	98.2774	98.2453	98.2453	98.2406	98.2314	98.2129	98.2672	98.2545	98.251	98.2673	98.2468	98.259	98.2433	98.2391	100	98.274
S. aureus Lodi10B	98.0431	98.0129	98.0441	98.0296	98.0681	98.0288	98.0518	98.0296	98.0715	98.0744	98.0555	98.0562	98.0256	98.0809	98.0577	98.0635	98.0569	99.1246	99.1315	99.113	99.1431	99.1512	99.1379	99.1224	99.1242	99.054	99.1033	99.0789	99.0027	99.0909	99.0811	99.1042	99.0955	99.1076	99.0888	99.0873	99.093	99.0889	99.0958	99.0998	99.1147	99.1443	99.1274	99.1375	99.149	99.12	99.1029	98.274	100
S. aureus SA20	98.0572	98.0112	98.0679	98.0247	98.0469	98.1068	98.1191	98.124	98.0447	98.096	98.0737	98.083	98.1108	98.0773	98.0427	98.0739	98.0635	99.1226	99.146	99.1504	99.1544	99.1586	99.1328	99.1211	99.1164	99.07	99.125	99.0802	99.0114	99.1156	99.0821	99.0893	99.1077	99.101	99.1001	99.0866	99.0967	99.1005	99.0825	99.0816	99.1066	99.1306	99.1133	99.113	99.1104	99.1354	99.1385	98.2187	99.9821
S. aureus 26520_17781-1	98.0025	98.0896	98.0603	97.9981	98.0483	98.0511	98.0664	98.0511	98.079	98.1084	98.0792	98.0406	98.0755	98.099	98.0702	98.0543	98.1097	99.1518	99.1429	99.1304	99.1277	99.1682	99.1423	99.1164	99.1067	99.0684	99.1108	99.0445	99.0401	99.1049	99.081	99.0825	99.0894	99.0659	99.1089	99.1153	99.0873	99.0635	99.0758	99.0694	99.1344	99.1534	99.1149	99.1476	99.1529	99.115	99.1053	98.278	99.9808
S. aureus 26520_17600-9	98.0094	98.072	98.0903	98.0421	98.0549	98.0492	98.052	98.0463	98.0537	98.0741	98.1002	98.0693	98.0676	98.1064	98.0793	98.05	98.0419	99.1406	99.1343	99.1398	99.1356	99.1687	99.1365	99.1324	99.1178	99.0711	99.1181	99.0419	99.0104	99.1085	99.0631	99.0909	99.0891	99.1191	99.1032	99.0965	99.0768	99.0889	99.0767	99.0862	99.1315	99.1117	99.1174	99.1259	99.1481	99.1014	99.11	98.279	99.98
S. aureus 24246	98.0813	98.0649	98.0946	98.0455	98.0765	98.0766	98.0625	98.0575	98.1024	98.0988	98.1503	98.0858	98.077	98.0987	98.0881	98.0732	98.0848	99.1688	99.1525	99.1662	99.136	99.1796	99.1544	99.1421	99.1181	99.1	99.1276	99.0878	99.0149	99.1088	99.0985	99.1001	99.1233	99.1191	99.105	99.1205	99.0876	99.1035	99.0901	99.0942	99.1321	99.146	99.1585	99.1468	99.1492	99.1384	99.1322	98.287	99.9818
S. aureus 372P	98.046	98.0217	98.0872	98.0404	98.0528	98.0296	98.0213	98.0318	98.0323	98.0742	98.0685	98.0599	98.0844	98.0794	98.0379	98.0804	98.088	99.1201	99.1519	99.1472	99.1283	99.1205	99.1391	99.1478	99.1015	99.0758	99.0987	99.0795	99.009	99.0983	99.0557	99.0947	99.1049	99.1115	99.0876	99.084	99.093	99.0972	99.0753	99.0631	99.0848	99.1425	99.1347	99.1491	99.1414	99.0995	99.08	98.2715	99.9791
S. aureus 200P	98.0462	98.0218	98.0894	98.0364	98.0451	98.1114	98.0941	98.0957	98.0192	98.0723	98.0424	98.0437	98.0612	98.0615	98.0874	98.0414	98.0363	99.0999	99.1186	99.1306	99.1693	99.1709	99.141	99.11	99.109	99.09	99.1037	99.0399	98.9999	99.1108	99.0759	99.0949	99.1174	99.0988	99.1047	99.0662	99.1078	99.0944	99.0712	99.0917	99.1135	99.1309	99.142	99.1356	99.1569	99.1085	99.0961	98.2497	99.9735
S. aureus DSM 20231	98.1005	98.0409	98.0456	97.9857	98.0787	98.0705	98.0915	98.0847	98.1158	98.0677	98.0685	98.0554	98.0913	98.084	98.0811	98.0889	98.0721	99.1072	99.1583	99.1182	99.1475	99.1662	99.1535	99.1182	99.1062	99.0758	99.073	99.0548	99.0096	99.0903	99.0797	99.1123	99.1357	99.1181	99.0983	99.0914	99.089	99.1105	99.0987	99.0887	99.1106	99.1513	99.1386	99.1521	99.1403	99.132	99.1497	98.2743	99.9449
S. aureus YNSA394	98.0429	98.086	98.0886	97.9876	98.0747	98.0333	98.0358	98.0484	98.032	98.0677	98.0271	98.0349	98.0775	98.0795	98.1171	98.0795	98.0577	98.9874	99.0467	98.992	98.9992	99.0363	99.0223	99.0397	99.0575	98.9768	99.0382	98.9898	98.9831	99.0412	99.0564	99.0666	99.0863	99.073	99.0569	99.0312	98.9726	99.0286	98.9824	99.0354	99.0521	99.0545	99.0513	99.0729	99.0524	99.0926	99.0782	98.2494	98.9888
S. aureus SA51	98.1008	98.0842	98.0861	98.0211	98.0516	98.0596	98.0614	98.0661	98.0288	98.0676	98.0524	98.0572	98.1044	98.0745	98.0885	98.0638	98.0315	99.0067	99.0449	98.9794	99.0458	99.0298	99.0319	99.0074	99.0601	99.0391	99.0176	98.9786	98.9887	99.039	99.0413	99.0914	99.1161	99.1018	99.0457	98.9985	98.9774	99.0246	98.9996	99.0373	99.0492	99.0649	99.0635	99.0819	99.0679	99.0588	99.0715	98.2343	98.9902
S. aureus YNSA521	98.0159	98.0728	98.0971	98.0516	98.0972	98.117	98.1278	98.126	98.0458	98.0717	98.0581	98.0567	98.0928	98.0622	98.0863	98.0546	98.0105	99.0236	99.0573	99.0299	99.0305	99.0632	99.019	99.0318	99.0311	98.992	99.0629	99.0113	98.9538	99.0267	99.0657	99.0873	99.0852	99.1112	99.0542	99.0343	99.0424	99.0287	99.0497	99.0309	99.0366	99.0606	99.052	99.0933	99.0604	99.0428	99.0341	98.2618	98.9718
S. aureus SA02	98.0517	98.0188	98.013	98.0019	98.0235	97.9735	97.9543	97.9466	98.0337	98.102	98.0321	98.0639	98.0441	98.0788	98.0378	98.0584	98.0373	99.0054	99.0269	98.9829	99.0232	99.0235	99.0256	98.9471	99.0307	98.9686	98.9738	98.9841	98.9521	99.0884	99.0534	99.0192	99.056	99.0182	99.0247	99.0376	99.0108	99.0386	99.0006	99.0442	99.0425	99.0426	99.0288	99.068	99.0642	99.0358	99.0421	98.2396	99.0159
S. aureus LBMM3245	98.0243	98.1026	98.0863	98.0548	98.0942	98.1239	98.0979	98.125	98.0924	98.1034	98.0599	98.063	98.0942	98.0969	98.0686	98.0703	98.063	99.0016	99.0215	98.9702	99.0193	99.0504	99.0301	98.9648	99.0367	99.0168	99.0287	98.9794	98.9674	99.0314	99.0263	99.0489	99.0812	99.0647	99.0584	99.0473	99.0383	99.0624	99.0476	98.9985	99.0293	99.0446	99.0474	99.0554	99.0372	99.0396	99.0385	98.2459	99.0113
S. aureus 363P	98.0495	98.0102	98.0392	98.0059	98.0333	98.0514	98.0331	98.0243	98.0747	98.0691	98.0162	98.0244	98.0759	98.082	98.0596	98.0462	98.0547	98.9783	99.038	99.0188	99.0265	99.048	98.9892	98.9851	99.0229	98.9616	99.0204	99.0192	98.9404	99.0939	99.0692	99.0753	99.0963	98.9978	99.0392	99.0364	99.0257	99.0244	99.0253	99.0228	99.0349	99.0486	99.0641	99.0705	99.0245	99.05	99.0306	98.2746	99.0025
S. aureus Chi-4	97.746	97.754	97.7789	97.7866	97.8109	97.8272	97.8219	97.8153	97.7971	97.7512	97.7385	97.689	97.7274	97.7496	97.7598	97.7539	97.7041	97.5997	97.6371	97.5645	97.572	97.5916	97.5531	97.5818	97.6188	97.5962	97.6198	97.5894	97.6003	97.5685	97.6379	97.5497	97.5564	97.5525	97.5705	97.5396	97.5784	97.5737	97.5675	97.6229	97.5544	97.5825	97.458	97.5822	97.556	97.547	97.5529	97.8111	97.5393
S. aureus C1891	97.7487	97.7213	97.7848	97.7604	97.7703	97.8077	97.8109	97.8292	97.8341	97.7476	97.7476	97.7375	97.7278	97.7525	97.7204	97.7782	97.7205	97.5463	97.6229	97.5547	97.5851	97.5456	97.5655	97.5122	97.5788	97.5622	97.6116	97.6096	97.6187	97.5761	97.6081	97.5529	97.5572	97.5637	97.6218	97.5408	97.5679	97.5874	97.5774	97.6081	97.5377	97.5932	97.5271	97.5647	97.6016	97.5763	97.5387	97.8219	97.6074
S. aureus 10_2016	97.7955	97.7576	97.7817	97.7957	97.7909	97.7778	97.7873	97.7976	97.689	97.7748	97.7085	97.7248	97.7507	97.7784	97.7367	97.7565	97.7129	97.5704	97.5892	97.619	97.5189	97.5055	97.4799	97.5134	97.5851	97.5376	97.6177	97.6001	97.5306	97.5625	97.5289	97.5362	97.5575	97.4701	97.6011	97.5553	97.5592	97.5461	97.5583	97.5587	97.51	97.5402	97.5327	97.5846	97.5578	97.6062	97.5453	97.7815	97.5979
S. aureus Tur-20	97.7638	97.7985	97.7816	97.7795	97.7871	97.8479	97.8584	97.8516	97.7247	97.7067	97.7036	97.7835	97.7208	97.7563	97.7646	97.7707	97.7439	97.5781	97.5687	97.6235	97.5562	97.5232	97.5539	97.5708	97.5908	97.6312	97.6466	97.5733	97.6328	97.5672	97.6098	97.6005	97.6523	97.595	97.5826	97.5459	97.5345	97.5819	97.5528	97.5571	97.5615	97.5456	97.5157	97.5796	97.539	97.5754	97.5491	97.7923	97.5798
S. aureus R4	97.7561	97.8045	97.8174	97.774	97.824	97.8327	97.829	97.8496	97.7498	97.7204	97.6971	97.7385	97.7682	97.692	97.7109	97.7404	97.7401	97.5965	97.6486	97.6374	97.525	97.5718	97.5701	97.6919	97.6827	97.5883	97.6997	97.6014	97.5842	97.6366	97.6115	97.6072	97.5854	97.6222	97.5881	97.6097	97.5911	97.5895	97.5937	97.5696	97.4965	97.5684	97.544	97.5676	97.5714	97.5296	97.6006	97.7859	97.608
S. aureus R6	97.7243	97.6982	97.8129	97.7584	97.8084	97.8206	97.8173	97.8093	97.722	97.7176	97.6982	97.6916	97.743	97.6936	97.7366	97.7021	97.7216	97.5808	97.5624	97.5725	97.5726	97.5661	97.5598	97.5856	97.6104	97.5216	97.6289	97.5765	97.5884	97.5584	97.5956	97.6209	97.6231	97.6391	97.5837	97.5728	97.6434	97.62	97.608	97.5929	97.5165	97.5937	97.566	97.5587	97.5552	97.5149	97.517	97.7899	97.5622
S. aureus R7	97.7454	97.6877	97.7481	97.7816	97.7129	97.7813	97.7729	97.7623	97.7584	97.7124	97.7001	97.674	97.7664	97.7217	97.7802	97.8071	97.7463	97.5968	97.587	97.5717	97.5851	97.5631	97.585	97.6172	97.6236	97.5335	97.6124	97.5787	97.651	97.5899	97.6751	97.5804	97.5929	97.5907	97.5707	97.5639	97.5438	97.5361	97.5537	97.5705	97.4727	97.5684	97.5081	97.559	97.559	97.526	97.5239	97.7335	97.564
S. aureus C1894	97.7725	97.7388	97.7856	97.8903	97.7854	97.8391	97.8258	97.8259	97.7348	97.7024	97.7334	97.7437	97.713	97.7388	97.7209	97.7487	97.7023	97.5793	97.5864	97.5752	97.5901	97.5789	97.5964	97.6123	97.6415	97.6346	97.5892	97.6224	97.5767	97.5637	97.5871	97.6422	97.5933	97.5539	97.6107	97.5743	97.5963	97.5879	97.5763	97.5877	97.567	97.5289	97.5088	97.5904	97.5245	97.5856	97.5747	97.7701	97.5551
S. aureus 46930_35018	97.7278	97.7537	97.7575	97.7829	97.8284	97.856	97.8545	97.8652	97.8002	97.7094	97.7201	97.7289	97.741	97.7502	97.7715	97.8232	97.6965	97.6115	97.5865	97.5956	97.5582	97.6114	97.5506	97.6001	97.6249	97.6195	97.6267	97.5676	97.6492	97.6159	97.639	97.6263	97.5829	97.6101	97.6274	97.5929	97.5958	97.553	97.562	97.6132	97.6248	97.5216	97.5457	97.5637	97.57	97.5581	97.5609	97.7687	97.5998
S. aureus Tur-22	97.755	97.6761	97.7989	97.7633	97.7877	97.8053	97.8139	97.7787	97.7489	97.7165	97.7482	97.6874	97.7461	97.7215	97.778	97.7043	97.7342	97.5512	97.5908	97.5428	97.5636	97.5136	97.5585	97.5644	97.5797	97.5414	97.6293	97.5993	97.631	97.5295	97.6057	97.5945	97.5939	97.5532	97.588	97.5421	97.6027	97.5792	97.5801	97.5808	97.5897	97.6252	97.5163	97.6085	97.5953	97.4934	97.5263	97.8254	97.5343
S. aureus Tur-15	97.738	97.7711	97.8226	97.7424	97.7841	97.7908	97.7959	97.7959	97.831	97.7706	97.6791	97.7346	97.7759	97.7621	97.7271	97.7125	97.7305	97.5442	97.577	97.5984	97.5473	97.5623	97.536	97.5693	97.6071	97.5654	97.6286	97.6012	97.6355	97.5844	97.5715	97.6022	97.5902	97.5208	97.6127	97.5342	97.5734	97.6064	97.6195	97.5896	97.5203	97.6017	97.5135	97.5867	97.5861	97.5612	97.5196	97.8132	97.567
S. aureus Tur-6	97.7197	97.7362	97.7879	97.7486	97.7902	97.8094	97.813	97.799	97.7761	97.7621	97.7167	97.7166	97.7104	97.7596	97.7466	97.7147	97.785	97.5372	97.5704	97.556	97.5444	97.5174	97.5341	97.5647	97.5761	97.5708	97.6112	97.6051	97.6138	97.5405	97.5645	97.5816	97.5868	97.4934	97.6319	97.5357	97.5626	97.5819	97.5695	97.6241	97.5554	97.6311	97.4769	97.5596	97.604	97.5528	97.5478	97.8448	97.5449
S. aureus Chi-8	97.7385	97.702	97.7688	97.7572	97.7369	97.7893	97.7816	97.7568	97.7952	97.7357	97.6745	97.7091	97.7609	97.7151	97.7832	97.6744	97.7665	97.575	97.601	97.5399	97.5409	97.5345	97.5832	97.5546	97.6118	97.5517	97.5934	97.5419	97.6467	97.6046	97.5852	97.5708	97.5928	97.5188	97.5911	97.5442	97.5184	97.5758	97.5091	97.5764	97.5901	97.5853	97.5118	97.5807	97.5763	97.5564	97.5302	97.833	97.5749
S. aureus Chi-10	97.717	97.7812	97.8077	97.7631	97.8248	97.8206	97.8514	97.8224	97.8022	97.7468	97.707	97.7318	97.7355	97.7747	97.6999	97.726	97.7744	97.5547	97.5843	97.5747	97.5562	97.5402	97.5619	97.5855	97.5848	97.607	97.6347	97.5764	97.585	97.5333	97.6038	97.5936	97.5483	97.5874	97.5941	97.5257	97.5762	97.6087	97.5916	97.63	97.5434	97.6008	97.4739	97.5987	97.5679	97.5612	97.5341	97.8295	97.5466
S. aureus Tur-16	97.7608	97.7597	97.848	97.8063	97.7993	97.8311	97.8639	97.8315	97.7905	97.7642	97.7217	97.7166	97.7465	97.7599	97.7813	97.8201	97.7314	97.6531	97.6091	97.6221	97.6053	97.5482	97.5701	97.5774	97.6322	97.6065	97.6402	97.6069	97.6968	97.6124	97.6658	97.6698	97.6581	97.6495	97.6157	97.6354	97.6035	97.5934	97.587	97.6109	97.5661	97.5695	97.5518	97.5579	97.5855	97.6003	97.5403	97.8146	97.6194
S. aureus 2011-60-2256-5	97.7794	97.7308	97.7787	97.7748	97.7422	97.7728	97.7659	97.7728	97.7501	97.7456	97.6872	97.8016	97.7626	97.7598	97.7033	97.7595	97.6949	97.5721	97.6204	97.5591	97.6227	97.5613	97.6063	97.5589	97.6088	97.5316	97.6423	97.592	97.5987	97.6142	97.607	97.6121	97.625	97.624	97.6248	97.5767	97.5946	97.623	97.6239	97.6096	97.6037	97.6217	97.5488	97.5824	97.6221	97.6124	97.553	97.837	97.6368
S. aureus 12S01153	97.7094	97.755	97.7504	97.7852	97.8339	97.8279	97.8489	97.8273	97.7365	97.7605	97.6967	97.6973	97.7317	97.7447	97.7749	97.709	97.7717	97.6542	97.6292	97.64	97.6275	97.5911	97.5531	97.6171	97.6499	97.6345	97.6629	97.5875	97.6341	97.5433	97.5959	97.5892	97.6279	97.6242	97.6062	97.6136	97.6047	97.613	97.5945	97.616	97.5875	97.619	97.5415	97.5954	97.6443	97.5861	97.547	97.8309	97.5275
S. aureus 2010-60-7626-19	97.7521	97.7743	97.7901	97.8162	97.8498	97.8292	97.8312	97.8382	97.7047	97.7634	97.7527	97.7897	97.7618	97.7768	97.7174	97.7333	97.6981	97.6063	97.5932	97.6221	97.5655	97.5156	97.5776	97.6377	97.6634	97.6287	97.6915	97.6699	97.5673	97.6195	97.5989	97.6802	97.6579	97.6291	97.6076	97.6096	97.6106	97.6175	97.6436	97.6124	97.6003	97.648	97.5125	97.6282	97.5878	97.6292	97.5758	97.8408	97.6133
S. aureus M357	97.8064	97.7514	97.8417	97.8074	97.8059	97.8596	97.817	97.8235	97.6926	97.7542	97.7311	97.7827	97.7273	97.7281	97.7592	97.7542	97.6941	97.6245	97.63	97.6061	97.6671	97.5577	97.6132	97.6603	97.615	97.5996	97.6682	97.6038	97.5713	97.6185	97.6206	97.6465	97.6659	97.5818	97.6005	97.5722	97.6135	97.6451	97.6168	97.6709	97.592	97.6299	97.5338	97.6134	97.6052	97.5901	97.5861	97.854	97.6589
S. aureus M267-1	97.7671	97.788	97.821	97.7421	97.7888	97.786	97.805	97.7905	97.7671	97.7202	97.6695	97.7668	97.7856	97.7347	97.7795	97.7626	97.7101	97.6002	97.6257	97.604	97.6219	97.5636	97.629	97.6467	97.622	97.6046	97.6195	97.5845	97.6753	97.5888	97.644	97.6615	97.6448	97.5839	97.5942	97.649	97.5496	97.6172	97.6142	97.6162	97.5594	97.6164	97.5543	97.547	97.6331	97.5953	97.5538	97.8507	97.6336
S. aureus 09S01694	97.7611	97.8116	97.8322	97.8323	97.8121	97.8124	97.8448	97.8142	97.7245	97.7533	97.7109	97.7734	97.7307	97.7574	97.7892	97.7596	97.782	97.5942	97.6392	97.6112	97.6521	97.5481	97.5565	97.6517	97.655	97.6326	97.674	97.6128	97.6276	97.5756	97.6145	97.6801	97.6364	97.6337	97.642	97.5825	97.6055	97.6217	97.6388	97.6051	97.6338	97.6498	97.5291	97.6387	97.6133	97.5888	97.5831	97.8927	97.6253
S. aureus 2010-60-6063-29	97.7633	97.7819	97.8416	97.8276	97.7647	97.786	97.809	97.8244	97.7781	97.71	97.7196	97.7241	97.761	97.7648	97.7226	97.7602	97.7077	97.5752	97.6268	97.6059	97.6062	97.5488	97.5854	97.601	97.6033	97.5989	97.648	97.6122	97.6091	97.5929	97.5804	97.6685	97.6685	97.621	97.6476	97.5997	97.605	97.5969	97.5986	97.6021	97.5829	97.6267	97.572	97.5532	97.6354	97.5686	97.5105	97.8196	97.6176
S. aureus M457-1	97.8192	97.7817	97.788	97.8072	97.7885	97.8131	97.8338	97.8345	97.7272	97.7581	97.6993	97.7584	97.7606	97.7047	97.7827	97.8315	97.8051	97.6175	97.6488	97.6425	97.5596	97.586	97.5845	97.6273	97.6076	97.5876	97.7179	97.5659	97.6339	97.6348	97.6406	97.6058	97.6417	97.6393	97.6376	97.6024	97.5797	97.5746	97.6391	97.5863	97.652	97.6151	97.5562	97.6072	97.5772	97.5293	97.5297	97.8214	97.63
S. aureus 12S01399	97.7184	97.7224	97.7645	97.7879	97.8323	97.8429	97.8424	97.842	97.7169	97.7493	97.7362	97.7697	97.7254	97.771	97.7587	97.7357	97.7243	97.5602	97.6038	97.5628	97.601	97.5408	97.5586	97.6426	97.6386	97.6125	97.6664	97.637	97.5874	97.5554	97.6074	97.6664	97.6416	97.5973	97.631	97.5595	97.5962	97.6435	97.6094	97.6039	97.6285	97.6506	97.5187	97.6224	97.6279	97.5802	97.5623	97.8601	97.5956
S. aureus 10S00488	97.7405	97.7887	97.8494	97.8182	97.7996	97.8064	97.8344	97.815	97.7474	97.7487	97.6939	97.7333	97.7495	97.7581	97.754	97.7809	97.7435	97.5632	97.633	97.6278	97.6134	97.5412	97.5555	97.6101	97.6366	97.6046	97.6589	97.6033	97.5892	97.5849	97.6213	97.6616	97.6593	97.6423	97.6412	97.5826	97.6048	97.614	97.6376	97.6185	97.5926	97.6392	97.5353	97.5901	97.6083	97.5905	97.5496	97.8431	97.6423
S. aureus 76630	97.7671	97.755	97.7942	97.7965	97.869	97.8241	97.8063	97.8069	97.7388	97.7677	97.7575	97.7192	97.7481	97.7216	97.7733	97.7508	97.7499	97.5912	97.6421	97.6312	97.5031	97.5712	97.5423	97.582	97.6281	97.5977	97.6709	97.6324	97.6279	97.5741	97.6137	97.6755	97.7024	97.6554	97.594	97.6118	97.6308	97.6605	97.6324	97.6072	97.5769	97.6302	97.5383	97.5835	97.5951	97.5775	97.567	97.7685	97.6145
S. aureus Sau 194	97.7023	97.7276	97.8267	97.7598	97.8023	97.8033	97.8082	97.7871	97.8	97.7627	97.7321	97.7505	97.7135	97.7769	97.7376	97.7669	97.7133	97.6448	97.6036	97.6077	97.6356	97.5621	97.5962	97.5817	97.6615	97.579	97.6378	97.6063	97.6181	97.5616	97.6377	97.6464	97.6449	97.6202	97.6124	97.5815	97.5825	97.6428	97.6142	97.6755	97.569	97.5895	97.5197	97.6089	97.6062	97.5783	97.5479	97.8124	97.6286
S. aureus 12464	97.7007	97.7734	97.7816	97.7485	97.834	97.8216	97.8694	97.8368	97.7773	97.7487	97.7145	97.7297	97.6994	97.7534	97.732	97.7245	97.716	97.5927	97.6298	97.6292	97.6016	97.5799	97.5756	97.5985	97.6411	97.611	97.6393	97.6194	97.5909	97.5934	97.6318	97.6863	97.6907	97.6314	97.6165	97.5719	97.6152	97.64	97.6108	97.6652	97.5916	97.6467	97.4941	97.5985	97.5776	97.574	97.5756	97.8667	97.6222
S. aureus M520-1	97.7439	97.7656	97.8157	97.775	97.7784	97.7988	97.806	97.7887	97.7973	97.7334	97.722	97.7228	97.7034	97.7266	97.7991	97.7443	97.7525	97.6662	97.6544	97.6191	97.6144	97.5965	97.563	97.6426	97.6786	97.5814	97.6485	97.6122	97.7065	97.6146	97.6207	97.6408	97.6552	97.6296	97.6363	97.5703	97.6019	97.6076	97.6216	97.6572	97.6048	97.6367	97.5135	97.5742	97.6294	97.6061	97.6067	97.8463	97.619
S. aureus 18SBCL671	97.7631	97.7891	97.8328	97.8259	97.8299	97.8638	97.8373	97.8646	97.7374	97.7987	97.8181	97.7892	97.8136	97.8353	97.8014	97.8282	97.7923	97.5689	97.525	97.6171	97.532	97.5516	97.541	97.5931	97.5642	97.5619	97.6412	97.6266	97.6018	97.5498	97.5309	97.62	97.6304	97.595	97.6119	97.5467	97.5902	97.6019	97.6123	97.5939	97.5972	97.625	97.5633	97.5913	97.5511	97.4911	97.5045	97.8403	97.5916
S. aureus SA-022	97.7691	97.8433	97.8402	97.8323	97.8468	97.8658	97.8981	97.866	97.7777	97.7993	97.7642	97.7885	97.7836	97.8082	97.8488	97.8214	97.8124	97.5352	97.5549	97.5955	97.533	97.5701	97.473	97.5782	97.585	97.6129	97.6135	97.571	97.5694	97.5205	97.6049	97.5511	97.5741	97.5989	97.6279	97.5407	97.6026	97.6064	97.5813	97.5762	97.6185	97.597	97.5714	97.56	97.5707	97.5275	97.5448	97.8112	97.5381
S. aureus 18SBCL678	97.8234	97.8016	97.8156	97.8633	97.8071	97.8865	97.8513	97.9002	97.76	97.7747	97.7914	97.8006	97.783	97.7558	97.8176	97.8251	97.7376	97.4758	97.5604	97.5754	97.5672	97.5414	97.5165	97.4965	97.6079	97.5421	97.5861	97.5476	97.575	97.5473	97.5896	97.5412	97.573	97.554	97.5506	97.5135	97.5512	97.5544	97.5482	97.5442	97.5105	97.5467	97.5174	97.5912	97.5099	97.5551	97.5644	97.7526	97.4976
S. aureus 18SBCL674	97.4649	97.4488	97.5045	97.4682	97.4504	97.5051	97.4803	97.4853	97.4451	97.4368	97.458	97.4681	97.4013	97.4506	97.4721	97.4414	97.4124	97.2325	97.226	97.2049	97.2369	97.241	97.2497	97.2247	97.2763	97.2423	97.3635	97.279	97.2769	97.228	97.2611	97.2273	97.25	97.2238	97.2434	97.1916	97.2285	97.2612	97.2237	97.3191	97.2643	97.2445	97.2437	97.2915	97.263	97.2485	97.2943	97.4847	97.2521
S. aureus 18SBCL673	97.4628	97.4765	97.4347	97.4948	97.4556	97.448	97.4649	97.4672	97.45	97.4304	97.4646	97.4349	97.4402	97.4579	97.4583	97.4614	97.3962	97.2073	97.2378	97.207	97.203	97.3018	97.2552	97.2742	97.2969	97.2725	97.3705	97.3202	97.2061	97.2309	97.2677	97.2282	97.257	97.2561	97.2644	97.2675	97.1981	97.2556	97.1941	97.2182	97.2641	97.2769	97.3042	97.2626	97.2298	97.2367	97.2679	97.4553	97.2341
S. aureus 356P	97.5183	97.4624	97.4952	97.5416	97.5031	97.5326	97.5495	97.519	97.4594	97.444	97.4804	97.3841	97.4626	97.4233	97.4929	97.43	97.4238	97.243	97.2516	97.2751	97.236	97.2583	97.2371	97.2298	97.29	97.2785	97.3464	97.2834	97.232	97.254	97.2479	97.3167	97.2917	97.2683	97.241	97.2383	97.2308	97.3345	97.1986	97.2567	97.2064	97.2002	97.2987	97.2709	97.2388	97.2401	97.302	97.4417	97.2215
S. argenteus MSHR1132	87.1424	87.1796	87.1319	87.0512	87.3085	87.3239	87.2614	87.3097	87.2979	87.1811	87.2054	87.5041	87.2981	87.2907	87.3838	87.3543	87.2767	87.4065	87.2422	87.2777	87.2932	87.3152	87.2259	87.4339	87.3685	87.5523	87.2921	87.3001	87.3428	87.5638	87.689	87.35	87.2732	87.2828	87.4932	87.3975	87.4321	87.373	87.3903	87.3728	87.4142	87.3128	87.4709	87.3035	87.3697	87.4143	87.4483	87.5403	87.6142
[truncated: 49 more columns]
