# Supplementary material for: First Genome-Based Characterisation and Staphylococcal Enterotoxin Production Ability of Methicillin-Susceptible and Methicillin-Resistant Staphylococcus aureus Strains Isolated from Ready-to-Eat Foods in Algiers (Algeria)
Source: Toxins (Basel). 2022 Oct 25;14(11):731. doi: 10.3390/toxins14110731 (PMC9694651; doi:10.3390/toxins14110731)
Supplement: Supplementary file 1 [file toxins-14-00731-s001.zip › Supplementary Table S7_se and sel genes_revised_1.xlsx]

## Sheet: Foglio1
Supplementary Table S7. se and sel genes and predicted protein sequences in S. aureus strains
		SA01			SA02			SA04			SA07			SA08			SA10			SA18			SA20			SA24			SA46			SA51			SA82
product	gene	aa	nt	% identity with ref sequences	aa	nt	% identity with ref sequences	aa	nt	% identity with ref sequences	aa	nt	% identity with ref sequences	aa	nt	% identity with ref sequences	aa	nt	% identity with ref sequences	aa	nt	% identity with ref sequences	aa	nt	% identity with ref sequences	aa	nt	% identity with ref sequences	aa	nt	% identity with ref sequences	aa	nt	% identity with ref sequences	aa	nt	% identity with ref sequences
Enterotoxin A	sea upstream region	-	-	-	-	-	-	-	>SA04_up_sea_NODE_3:84660-84853 GTTGTTAATACCAAGTAAGTAAGATATCTGAAATGTATAATAGAGTAAAAATGAAATCTTTTTATTATAGACAAATATAA AAAGTGTATAGTAATATATGTATGTATAATTAAATGATAATCATTTCATAATTATTGTATATAACTAAAT AACTACTTAACAAAAATAATTATGCTTTAGAGGTGAGCAAAATG	194/194, 100% nt identity with L22565.1 (sea upstream region FRI100); Borst and Betley, 1994	-	-	-	-	-	-	-	-	-	-	-	-	-	-	-	-	-	-	-	-	-	-	>SA51_up_sea_NODE_7:80403-80644 GTTGTCAATACCAAGTAAGTAAGATATCTGAAATGTATAATAGAGTAAAAATGAAATC TTTTTATTATATTATAGACAAGTATAAAAAAGGTATAGTAATATATGTATGTATAAGTAAATAATGATAA TTCTATAATTATTGTATATAACTAATAATTACTTCGACAAAAATAATCTATTATCCAAATATTTTAGATA ATAAAAAGTTTGTATGGAATTATGCTTTAGAGGTGAGCAAAATG	242/242, 100% nt identity with L22566.1 (sea region FRI281A); Borst and Betley, 1994	-	-	-
	sea	-	-	-	-	-	-	>SA04_J3T03_02780_sea MKKTAFTLLLFIALTLTTSPLVNGSEKSEEINEKDLRKKSELQG TALGNLKQIYYYNEKAKTENKESHDQFLQHTILFKGFFTDHSWYNDLLVDFDSKDIVD KYKGKKVDLYGAYYGYQCAGGTPNKTACMYGGVTLHDNNRLTEEKKVPINLWLDGKQN TVPLETVKTNKKNVTVQELDLQARRYLQEKYNLYNSDVFDGKVQRGLIVFHTSTEPSV NYDLFGAQGQYSNTLLRIYRDNKTINSENMHIDIYLYTS	>SA04_J3T03_02780_sea_NODE_3:84851-85621 ATGAAAAAAACAGCATTTACATTACTTTTATTCATTGCCCTAACGTTGACAACAAGTCCACTTGTAAATG GTAGCGAGAAAAGCGAAGAAATAAATGAAAAAGATTTGCGAAAAAAGTCTGAATTGCAGGGAACAGCTTT AGGCAATCTTAAACAAATCTATTATTACAATGAAAAAGCTAAAACTGAAAATAAAGAGAGTCACGATCAA TTTTTACAGCATACTATATTGTTTAAAGGCTTTTTTACAGATCATTCGTGGTATAACGATTTATTAGTAG ATTTTGATTCAAAGGATATTGTTGATAAATATAAAGGGAAAAAAGTAGACTTGTATGGTGCTTATTATGG TTA…	771/771, 100% nt identity with M18970.1 (sea allele class 1); Betley and Mekalanos, 1988; Borst and Betley, 1994	-	-	-	-	-	-	-	-	-	-	-	-	-	-	-	-	-	-	-	-	-	>SA51_J3T04_10205_sea MKKTAFILLLFIALTWTTSPLVNGSEKSEEINEKDLRKKSELQG AALGNLKQIYYYNEKAKTENKESHDQFLQHTILFKGFFTNHSWYNDLLVDFDSKDIVD KYKGKKVDLYGAYYGYQCAGGTPNKTACMYGGVTLHDNNRLTEEKKVPINLWLDGKQN TVPLETVKTNKKNVTVQELDLQARRYLQEKYNLYNSDVFDGKVQRGLIVFHTSTEPSV NYDLFGAQGQNSNTLLRIYRDNKTINSENMHIDIYLYTS	>SA51_J3T04_10205_sea_NODE_7:80642-81412 ATGAAAAAAACAGCATTTATACTACTTTTATTCATTGCCCTAACGTGGACAACAAGTCCACTTGTAAATG GTAGCGAGAAAAGCGAAGAAATAAATGAAAAAGATTTGCGAAAAAAGTCTGAATTGCAGGGAGCAGCTTT AGGCAATCTTAAACAAATCTATTATTACAATGAAAAAGCTAAAACTGAAAATAAAGAGAGTCACGATCAA TTTTTACAGCATACTATATTGTTTAAAGGCTTTTTTACAAATCATTCATGGTATAACGATTTATTAGTAG ATTTTGATTCAAAGGATATTGTTGATAAATATAAAGGGAAAAAAGTAGACTTATATGGTGCTTATTATGG TTA…	770/771, 99% nt identity with L22566.1 (sea allele class 2); 257/257, 100% aa identity with the predicted protein; Borst and Betley, 1994	-	-	-
Enterotoxin B	seb	-	-	-	-	-	-	-	-	-	-	-	-	-	-	-	-	-	-	>SA18_J3T01_00450_seb MYKRLFISHVILIFALILVISTPNVLAESQPDPKPDELHKSSKF TGLMENMKVLYDDNHVSAINVKSIDQFLYFDLIYSIKDTKLGNYDNVRVEFKNKDLAD KYKDKYVDVFGANYYYQCYFSKKTNDINSHQTDKRKTCMYGGVTEHNGNQLDKYRSIT VRVFEDGKNLLSFDVQTNKKKVTAQELDYLTRHYLVKNKKLYEFNNSPYETGYIKFIE NENSFWYDMMPAPGDKFDQSKYLMMYNDNKMVDSKDVKIEVYLTTKKK	>SA18_J3T01_00450_seb_NODE_8:44646-45443 ATGTATAAGAGATTATTTATTTCACATGTAATTTTGATATTCGCACTGATATTAGTTATTTCTACACCCA ACGTTTTAGCAGAGAGTCAACCAGATCCTAAACCAGATGAGTTGCACAAATCGAGTAAATTCACTGGTTT GATGGAAAATATGAAAGTTTTGTATGATGATAATCATGTATCAGCAATAAACGTTAAATCTATAGATCAA TTTCTATACTTTGACTTAATATATTCTATTAAGGACACTAAGTTAGGGAATTATGATAATGTTCGAGTCG AATTTAAAAACAAAGATTTAGCTGATAAATACAAAGATAAATACGTAGATGTGTTTGGAGCTAATTATTA TTA…	798/798, 100% nt identity with KX168628.1 (seb v1); Johler et al., 2016	-	-	-	-	-	-	-	-	-	-	-	-	-	-	-
Enterotoxin D	sed	-	-	-	-	-	-	-	-	-	-	-	-	-	-	-	-	-	-	-	-	-	>SA20_J3T02_03365*_sed* MKKFNILIALLFFTSLVISPLNVKANENIDSVKEKELHKKSELSSTALNNMKHSYADKNPIIGENKSTGDQFLENTLLYKKFFTDLINFEDLLINFNSKEMAQHFKSKNVDVYAIRYSINCYGGEIDKTACTYGGVTPHEGNKLKERKKIPINLWINGVQKEVSLDKVQTDKKMLPYKN	>SA20_J3T02_03365*_sed*_NODE_17_2933..3708 ATGAAAAAATTTAACATTCTTATTGCATTACTCTTTTTTACTAGTTTGGTAATATCTCCTTTAAACGTTA AAGCCAATGAAAACATTGATTCAGTAAAAGAGAAAGAATTGCATAAAAAATCTGAATTAAGTAGTACCGC GCTAAATAATATGAAACATTCTTATGCAGATAAAAATCCAATAATAGGAGAAAATAAAAGTACAGGAGAT CAATTTTTAGAAAATACTTTGCTTTACAAAAAATTTTTTACTGACCTTATCAATTTTGAAGATTTATTAA TAAACTTCAATTCAAAAGAAATGGCTCAACATTTCAAATCTAAAAATGTAGATGTTTACGCTATAAGATA T…	775/776, 99% nt identity with KX168621.1 (sed v3 truncated); 178/179, 99% aa with ANJ16445.1 (sed v3 truncated); Johler et al., 2016	-	-	-	-	-	-	-	-	-	-	-	-
Enterotoxin G	seg	-	-	-	>SA02_3P54_11775_seg MKKLSTVIIILILEIVFHNMNYVNAQPDPKLDELNKVSDYKNNK GTMGNVMNLYTSPPVEGRGVINSRQFLSHDLIFPIEYKSYNEVKTELENTELANNYKD KKVDIFGVPYFYTCIIPKSEPDINQNFGGCCMYGGLTFNSSENERDKLITVQVTIDNR QSLGFTITTNKNMVTIQELDYKARHWLTKEKKLYEFDGSAFESGYIKFTEKNNTSFWF DLFPKKELVPFVPYKFLNIYGDNKVVDSKSIKMEVFLNTH	>SA02_3P54_11775_seg_NODE_6:c169585-168812 ATGAAGAAATTATCTACTGTAATTATTATTTTGATTCTAGAAATAGTTTTTCATAATATGAATTATGTGA ATGCTCAACCCGATCCTAAATTAGACGAACTAAATAAAGTAAGTGATTATAAAAATAATAAGGGAACTAT GGGTAATGTAATGAATCTTTATACGTCTCCACCTGTTGAAGGAAGAGGAGTTATTAATTCTAGACAGTTT TTATCTCATGATTTAATTTTTCCAATTGAGTATAAGAGTTATAATGAGGTTAAAACTGAATTAGAAAATA CAGAATTAGCTAACAATTATAAAGATAAAAAAGTAGACATTTTTGGCGTTCCATATTTTTATACATGTAT A…	773/774, 99% nt identity with AF285760.1; 257/258, 99% aa identity with AAG36957.1; Jarraud et al., 2001	-	-	-	-	-	-	>SA08_KQP42_01815_seg MKKLSTVIIILILEIVFHNMNYVNAQPDPKLDELNKVSDYKNNK GTMGNVMNLYTSPPVEGRGVINSRQFLSHDLIFPIEYKSYNEVKTELENTELANNYKD KKVDIFGVPYFYTCIIPKSEPDINQNFGGCCMYGGLTFNSSENERDKLITVQVTIDNR QSLGFTITTNKNMVTIQELDYKARHWLTKEKKLYEFDGSAFESGYIKFTEKNNTSFWF DLFPKKELVPFVPYKFLNIYGDNKVVDSKSIKMEVFLNTH	>SA08_KQP42_01815_seg_NODE_12:39359-40132 ATGAAGAAATTATCTACTGTAATTATTATTTTGATTCTAGAAATAGTTTTTCATAATATGAATTATGTGA ATGCTCAACCCGATCCTAAATTAGACGAACTAAATAAAGTAAGTGATTATAAAAATAATAAGGGAACTAT GGGTAATGTAATGAATCTTTATACGTCTCCACCTGTTGAAGGAAGAGGAGTTATTAATTCTAGACAGTTT TTATCTCATGATTTAATTTTTCCAATTGAGTATAAGAGTTATAATGAGGTTAAAACTGAATTAGAAAATA CAGAATTAGCTAACAATTATAAAGATAAAAAAGTAGACATTTTTGGCGTTCCATATTTTTATACATGTAT AA…	773/774, 99% nt identity with AF285760.1; 257/258, 99% aa identity with AAG36957.1; Jarraud et al., 2001	-	-	-	-	-	-	-	-	-	>SA24_J3135_04230_seg MKKLSTVIIILILEIVFHNMNYVNAQPDPKLDELNKVSDYKNNK GTMGNVMNLYTSPPVEGRGVINSRQFLSHDLIFPIEYKSYNEVKTELENTELANNYKD KKVDIFGVPYFYTCIIPKSEPDINQNFGDCCMYGGLTFNSSENERDKLITVQVTIDNR QSLGFTITTNKNMVTIQELDYKARHWLTKEKKLYEFDGSAFESGYIKFTEKNNTSFWF DLFPKKELVPFVPYKFLNIYGDNKVVDSKSIKMEVFLNTH	>SA24_J3135_04230_seg_NODE_4:38191-38964 ATGAAGAAATTATCTACTGTAATTATTATTTTGATTCTAGAAATAGTTTTTCATAATATGAATTATGTGA ATGCTCAACCCGATCCTAAATTAGACGAACTAAATAAAGTAAGTGATTATAAAAATAATAAGGGAACTAT GGGTAATGTAATGAATCTTTATACGTCTCCACCTGTTGAAGGAAGAGGAGTTATTAATTCTAGACAGTTT TTATCTCATGATTTAATTTTTCCAATTGAGTATAAGAGTTATAATGAGGTTAAAACTGAATTAGAAAATA CAGAATTAGCTAACAATTATAAAGATAAAAAAGTAGACATTTTTGGCGTTCCATATTTTTATACATGTAT AAT…	772/774, 99% nt identity with AF285760.1; 256/258, 99% aa identity with AAG36957.1; Jarraud et al., 2001	-	-	-	>SA51_J3T04_07830_seg MKKLSTVIIILILEIVFHNMNYVNAQPDPKLDELNKVSDYKNNK GTMGNVMNLYTSPPVEGRGVINSRQFLSHDLIFPIEYKSYNEVKTELENTELANNYKD KKVDIFGVPYFYTCIIPKSEPDINQNFGGCCMYGGLTFNSSENERDKLITVQVTIDNR QSLGFTITTNKNMVTIQELDYKARHWLTKEKKLYEFDGSAFESGYIKFTEKNNTSFWF DLFPKKELVPFVPYKFLNIYGDNKVVDSKSIKMEVFLNTH	>SA51_J3T04_07830_seg_NODE_14:c16436-15663 ATGAAGAAATTATCTACTGTAATTATTATTTTGATTCTAGAAATAGTTTTTCATAATATGAATTATGTGA ATGCTCAACCCGATCCTAAATTAGACGAACTAAATAAAGTAAGTGATTATAAAAATAATAAGGGAACTAT GGGTAATGTAATGAATCTTTATACGTCTCCACCTGTTGAAGGAAGAGGAGTTATTAATTCTAGACAGTTT TTATCTCATGATTTAATTTTTCCAATTGAGTATAAGAGTTATAATGAGGTTAAAACTGAATTAGAAAATA CAGAATTAGCTAACAATTATAAAGATAAAAAAGTAGACATTTTTGGCGTTCCATATTTTTATACATGTAT A…	773/774, 99% nt identity with AF285760.1; 257/258, 99% aa identity with AAG36957.1; Jarraud et al., 2001	>SA82_KQP39_04565_seg MKKLSTVIIILILEIVFHNMNYVNAQPDPKLDELNKVSDYKNNK GTMGNVMNLYTSPPVEGRGVINSRQFLSHDLIFPIEYKSYNEVKTELENTELANNYKD KKVDIFGVPYFYTCIIPKSEPDINQNFGGCCMYGGLTFNSSENERDKLITVQVTIDNR QSLGFTITTNKNMVTIQELDYKARHWLTKEKKLYEFDGSAFESGYIKFTEKNNTSFWF DLFPKKELVPFVPYKFLNIYGDNKVVDSKSIKMEVFLNTH	>SA82_KQP39_04565_seg_NODE_18:37820-38593 ATGAAGAAATTATCTACTGTAATTATTATTTTGATTCTAGAAATAGTTTTTCATAATATGAATTATGTGA ATGCTCAACCCGATCCTAAATTAGACGAACTAAATAAAGTAAGTGATTATAAAAATAATAAGGGAACTAT GGGTAATGTAATGAATCTTTATACGTCTCCACCTGTTGAAGGAAGAGGAGTTATTAATTCTAGACAGTTT TTATCTCATGATTTAATTTTTCCAATTGAGTATAAGAGTTATAATGAGGTTAAAACTGAATTAGAAAATA CAGAATTAGCTAACAATTATAAAGATAAAAAAGTAGACATTTTTGGCGTTCCATATTTTTATACATGTAT AA…	773/774, 99% nt identity with AF285760.1; 257/258, 99% aa identity with AAG36957.1; Jarraud et al., 2001
Enterotoxin H	seh	-	-	-	-	-	-	>SA04_J3T03_06310_seh MINKIKILFSFLALLLSFTSYAKAEDLHDKSELTDLALANAYGQ YNHPFIKENIKSDEISGEKDLIFRNQGDSGNDLRVKFATADLAQKFKNKNVDIYGASF YYKCEKISENISECLYGGTTLNSEKLAQERVIGANVWVDGIQKETELIRTNKKNVTLQ ELDIKIRKILSDKYKIYYKDSEISKGLIEFDMKTPRDYSFDIYDLKGENDYEIDKIYE DNKTLKSDDISHIDVNLYTKKKV	>SA04_J3T03_06310_seh_NODE_2:307787-308509 ATGATTAATAAAATTAAAATATTATTTTCGTTTTTAGCATTATTACTTTCATTCACATCATATGCGAAAG CAGAAGATTTACACGATAAAAGTGAGTTAACAGATTTAGCTTTAGCTAATGCATATGGTCAATATAATCA CCCATTCATTAAAGAAAATATTAAGAGTGATGAAATAAGTGGAGAAAAAGATTTAATATTTAGAAATCAA GGTGATAGTGGCAATGATTTGAGAGTAAAGTTTGCAACTGCTGATTTAGCTCAGAAGTTTAAAAATAAAA ATGTAGATATATATGGGGCATCTTTTTATTATAAGTGTGAAAAAATAAGTGAAAATATTTCTGAATGTCT A…	723/723, 100% nt identity with AJ937548.1; Jørgensen et al., 2005	-	-	-	-	-	-	-	-	-	-	-	-	-	-	-	-	-	-	J3T00_04405*	>SA46_J3T00_04405*_seh*_NODE_7_c166169..166883 ATGAGAAAGAAAATTAGAATATTATTTTGTTTTTTACGCTCTTGTTTGTATTAACTTCATATGCAAAAGCAGAAGATTTACATGATAAAAGTGAGTTGAGTGACTTAGCTTTAGCTAATGCATACGGCCAATATAATCACCCATTTATTAAAGAAAATGTTATAAGTAGCGAAATAATTGGAGAAAAAGATTTAATATTTAGAAATCAAGGAGACAATGGTAATGATTTGAGAGTAAAATTTGCTAGTGCTGGTTTAGCTCAGAACTTTAAAAATAAAAATGTCGATATTTATGGTGCATCTTTTTATTATAAATGTGAAAAAGTTAGTGAAAATATTTCCGAATGTCTATA…	715/715, 100% nt identity with NC_017351.1 (Dicks et al., 2021)	-	-	-	-	-	-
Enterotoxin I	sei	-	-	-	>SA02_3P54_11790_sei MKKFKYSFILVFILLFNIKDLTYAQGDIGVGNLRNFYTKHDYID LKGVTDKNLPIANQLEFSTGTNDLISESNNWDEISKFKGKKLDIFGIDYNGPCKSKYM YGGATLSGQYLNSARKIPINLWVNGKHKTISTDKIATNKKLVTAQEIDVKLRRYLQEE YNIYGHNNTGKGKEYGYKSKFYSGFNNGKVLFHLNNEKSFSYDLFYTGDGLPVSFLKI YEDNKIIESEKFHLDVEISYVDSN	>SA02_3P54_11790_sei_NODE_6:c172315-171590 ATGAAAAAATTTAAATATAGTTTTATATTAGTTTTTATATTACTTTTTAACATTAAAGATCTTACGTATG CTCAAGGTGATATTGGTGTAGGTAACTTAAGAAATTTCTATACAAAACATGATTATATAGATTTAAAAGG CGTCACAGATAAAAACCTACCTATTGCAAATCAACTCGAATTTTCAACAGGTACCAATGATTTGATCTCA GAATCTAATAATTGGGACGAAATAAGTAAATTTAAAGGAAAGAAACTGGATATTTTTGGCATTGATTATA ATGGTCCTTGTAAATCTAAATACATGTATGGAGGGGCCACTTTATCAGGACAATACTTAAATTCTGCTAG A…	725/726, 99% nt identity identity with AF285760.1; 242/242, 100% aa identity with AAG36953.1; Jarraud et al., 2001	-	-	-	-	-	-	>SA08_KQP42_01800_sei MKKFKYSFILVFILLFNIKDLTYAQGDIGVGNLRNFYTKHDYID LKGVTDKNLPIANQLEFSTGTNDLISESNNWDEISKFKGKKLDIFGIDYNGPCKSKYM YGGATLSGQYLNSARKIPINLWVNGKHKTISTDKIATNKKLVTAQEIDVKLRRYLQEE YNIYGHNNTGKGKEYGYKSKFYSGFNNGKVLFHLNNEKSFSYDLFYTGDGLPVSFLKI YEDNKIIESEKFHLDVEISYVDSN	>SA08_KQP42_01800_sei_NODE_12:36630-37355 ATGAAAAAATTTAAATATAGTTTTATATTAGTTTTTATATTACTTTTTAACATTAAAGATCTTACGTATG CTCAAGGTGATATTGGTGTAGGTAACTTAAGAAATTTCTATACAAAACATGATTATATAGATTTAAAAGG CGTCACAGATAAAAACCTACCTATTGCAAATCAACTCGAATTTTCAACAGGTACCAATGATTTGATCTCA GAATCTAATAATTGGGACGAAATAAGTAAATTTAAAGGAAAGAAACTGGATATTTTTGGCATTGATTATA ATGGTCCTTGTAAATCTAAATACATGTATGGAGGGGCCACTTTATCAGGACAATACTTAAATTCTGCTAG AA…	725/726, 99% nt siimilarity with AF285760.1; 242/242, 100% aa identity with AAG36953.1; Jarraud et al., 2001	-	-	-	-	-	-	-	-	-	>SA24_J3135_04215_sei MKKFKYSFILVFILLFNIKDLTYAQGDIGVGNLRNFYTKHDYID LKGVTDKNLPIANQLEFSTGTNDLISESNNWDEISKFKGKKLDIFGIDYNGPCKSKYM YGGATLSGQYLNSARKIPINLWVNGKHKTISTDKIATNKKLVTAQEIDVKLRRYLQEE YNIYGHNNTGKGKEYGYKSKFYSGFNNGKVLFHLNNEKSFSYDLFYTGDGLPVSFLKI YEDNKIIESEKFHLDVEISYVDSN	>SA24_J3135_04215_sei_NODE_4_20744:35462-36187 ATGAAAAAATTTAAATATAGTTTTATATTAGTTTTTATATTACTTTTTAACATTAAAGATCTTACGTATG CTCAAGGTGATATTGGTGTAGGTAACTTAAGAAATTTCTATACAAAACATGATTATATAGATTTAAAAGG CGTCACAGATAAAAACCTACCTATTGCAAATCAACTCGAATTTTCAACAGGTACCAATGATTTGATCTCA GAATCTAATAATTGGGACGAAATAAGTAAATTTAAAGGAAAGAAACTGGATATTTTTGGCATTGATTATA ATGGTCCTTGTAAATCTAAATACATGTATGGAGGGGCCACTTTATCAGGACAATACTTAAATTCTGCT…	725/726, 99% nt identity with AF285760.1; 242/242, 100% aa identity with AAG36953.1; Jarraud et al., 2001	-	-	-	>SA51_J3T04_07845_sei MKKFKYSFILVFILLFNIKDLTYAQGDIGVGNLRNFYTKHDYID LKGVTDKNLPIANQLEFSTGTNDLISESNNWDEISKFKGKKLDIFGIDYNGPCKSKYM YGGATLSGQYLNFARKIPINLWVNGKHKTISTDKIATNKKLVTAQEIDVKLRRYLQEE YNIYGHNNTGKGKEYGYKSKFYSGFNNGKVLFHLNNEKSFSYDLFYTGDGLPVSFLKI YEDNKIIESEKFHLDVEISYVDSN	>SA51_J3T04_07845_sei_NODE_14:c19166-18441 ATGAAAAAATTTAAATATAGTTTTATATTAGTTTTTATATTACTTTTTAACATTAAAGATCTTACGTATG CTCAAGGTGATATTGGTGTAGGTAACTTAAGAAATTTCTATACAAAACATGATTATATAGATTTAAAAGG CGTCACAGATAAAAACCTACCTATTGCAAATCAACTCGAATTTTCAACAGGTACCAATGATTTGATCTCA GAATCTAATAATTGGGACGAAATAAGTAAATTTAAAGGAAAGAAACTGGATATTTTTGGCATTGATTATA ATGGTCCTTGTAAATCTAAATACATGTATGGAGGGGCCACTTTATCAGGACAATACTTAAATTTTGCTAG A…	724/726, 99% nt identity with AF285760.1; 241/242, 99% aa identity with AAG36953.1; Jarraud et al., 2001	>SA82_KQP39_04550_sei MKKFKYSFILVFILLFNIKDHTYAQGDIGVGNLRNFYTKHDYID LKGVTDKNLPIANQLEFSTGTNDLISESNNWDEISKFKGKKLDIFGIDYNGPCKSKYM YGGATLSGQYLNSARKIPINLWVNGKHKTISTDKIATNKKLVTAQEIDVKLRRYLQEE YNIYGHNNTGKGKEYGYKSKFYSGFNNGKVLFHLNNEKSFSYDLFYTGDGLPVSFLKI YEDNKIIESEKFHLDVEISYVDSN	>SA82_KQP39_04550_sei_NODE_18:35091-35816 ATGAAAAAATTTAAATATAGTTTTATATTAGTTTTTATATTACTTTTTAACATTAAAGATCATACGTATG CTCAAGGTGATATTGGTGTAGGTAACTTAAGAAATTTCTATACAAAACATGATTATATAGATTTAAAAGG CGTCACAGATAAAAACCTACCTATTGCAAATCAACTCGAATTTTCAACAGGTACCAATGATTTGATCTCA GAATCTAATAATTGGGACGAAATAAGTAAATTTAAAGGAAAGAAACTGGATATTTTTGGCATTGATTATA ATGGTCCTTGTAAATCTAAATACATGTATGGAGGGGCCACTTTATCAGGACAATACTTAAATTCTGCTAG AA…	723/726, 99% nt identity with AF285760.1; 241/242, 99% aa identity with AAG36953.1; Jarraud et al., 2001
Enterotoxin-like toxin J	selj	-	-	-	-	-	-	-	-	-	-	-	-	-	-	-	-	-	-	-	-	-	>SA20_J3T02_03355_selj MKKTIFILIFSLTLTLLITPLVYSDSKNETIKEKNLHKKSELSS ITLNNLRHIYFFNEKGISEKIMTEDQFLDYTLLFKSFFISHSQYNDLLVQFDSKETVN KFKGKQVDLYGSYYGFQCSGGKPNKTACMYGGVTLHENNQLYDTKKIPINLWIDSIRT VVPLDIVKTNKKKVTIQELDLQARYYLHKQYNLYNPSTFDGKIQKGLIVFHTSKEPLV SYDLFNVIGQYPDKLLKIYQDNKIIESENMHIDIYLYTSLIVLISLPLVL	>SA20_J3T02_03355_selj_NODE_17_c1232..2038 ATGAAAAAAACAATATTTATACTGATTTTCTCCCTGACGTTAACACTACTAATAACCCCTTTAGTTTACAGCGATAGCAAAAATGAAACAATTAAAGAAAAGAATTTGCACAAAAAATCAGAGTTAAGTAGTATTACTTTAAATAACCTCAGACATATATACTTCTTTAACGAAAAGGGTATCTCTGAAAAGATAATGACAGAAGATCAATTTTTAGATTACACACTATTATTTAAAAGTTTTTTCATAAGTCATTCACAGTATAACGACTTATTGGTACAATTCGATTCAAAAGAAACAGTTAATAAGTTTAAAGGCAAACAAGTAGATCTATACGGATCTTATTATGGTTTTCA…	807/807, 100% nt identity with KF831356.1; Utter et al., 2014	-	-	-	-	-	-	-	-	-	-	-	-
-	ψent1-ψent2*	-	-	-	J3P54_11785*	>SA02_J3P54_11785*_yent1yent2*_NODE_6:c170662..171433 ATGAAGTTATTTGCCTTTATCTTCATATGTGTTAAGTCTTGCAGCTTACTATTTATGTTAAATGGCAATCCTAAACCAGAACAATTGAATAAAGCGAGTGAATTCACTGGTCTAATGGATAATATGAGGTATTTTTATGATGATAAACACGTATCAGAAACAAACATTAAATCCCAAGAAAAGTTTTTACAACATGATTTATTATTTAAAATAAATGGTTCTAAAATTTTAAAAACAGAATTTAATAATAAAAGCCTTTCGGATAAATATAAAAATAAAAACGTAGATTTGTTTGGGACAAACTATTATAATCAATGCTATTTTTCATTGGATAATATGGAATTA…	603/604, 99% nt identity with DQ993159.1 (egc type 1, Collery and Smyth, 2007)	-	-	-	-	-	-	-	-	-	-	-	-	-	-	-	-	-	-	-	-	-	-	-	-	J3T04_07840*	>SA51_J3T04_07840*_yent1yent2*_NODE_14_complement(17513..18284) ATGAAGTTATTTGCCTTTATCTTCATATGTGTTAAGTCTTGCAGCTTACTATTTATGTTAAATGGCAATCCTAAACCAGAACAATTGAATAAAGCGAGTGAATTCACTGGTCTAATGGATAATATGAGGTATTTGTATGATGATAAACACGTATCAGAAACAAACATTAAATCCCAAGAAAAGTTTTTACAACATGATTTATTATTTAAAATAAATGGTTCTAAAATTTTAAAAACAGAATTTAATAATAAAAGCCTTTCGGATAAATATAAAAATAAAAACGTAGATTTGTTTGGGACAAACTATTATAATCAATGCTATTTTTCATTGGATAA…	604/604, 100% nt identity with DQ993159.1 (egc type 1)	-	-	-
Enterotoxin K	sek	-	-	-	-	-	-	>SA04_J3T03_02535_sek MKKLISILLINIIILGVSNNASAQGDIGIDNLRNFYTKKDFINL KDVKDNDTPIANQLQFSNESYDLISESKDFNKFSNFKGKKLDVFGISYNGQCNTKYIY GGITATNEYLDKPRNIPINIWINGNHKTISTNKVSTNKKFVTAQEIDIKLRRYLQEEY NIYGHNGTKKGEEYGHKSKFYSGFNIGKVTFHLNNNDTFSYDLFYTGDDGLPKSFLKI YEDNKTVESEKFHLDVDISYKETK	>SA04_J3T03_02535_sek_NODE_3_:c50181-49456 ATGAAAAAATTAATAAGCATCTTATTAATAAATATAATAATTTTAGGTGTCTCTAATAATGCCAGCGCTC AAGGTGATATAGGAATTGATAATCTCAGGAATTTTTATACAAAAAAAGACTTTATAAATTTAAAAGATGT AAAAGACAATGATACTCCTATAGCTAATCAACTACAATTTTCAAATGAATCCTATGATTTAATTTCAGAA TCAAAAGATTTTAATAAATTTAGTAATTTCAAAGGAAAAAAACTTGATGTTTTTGGTATTAGTTATAATG GCCAGTGTAACACTAAATACATATATGGTGGAATCACAGCTACTAACGAATATCTAGATAAACCTAGAAA T…	726/726, 100% nt identity with BA000033.2 (Staphylococcus aureus subsp. aureus MW2); Baba et al, 2002	-	-	-	-	-	-	-	-	-	-	-	-	-	-	-		-	-	-	-	-	-	-	-	-	-	-
Enterotoxin M	sem	-	-	-	>SA02_3P54_11795_sem MKRILIIVVLLFCYSQNHIATADVGVLNLRNYYGSYPIEDHQSI NPENNHLSHQLVFSMDNSTVTAEFKNVDDVKKFKNHAVDVYGLSYSGYCLKNKYIYGG VTLAGDYLEKSRRIPINLWVNGEHQTISTDKVSTNKKLVTAQEIDTKLRRYLQEEYNI YGFNDTNKGRNYGNKSKFSSGFNAGKILFHLNDGSSFSYDLFDTGTGQAESFLKIYND NKTVETEKFHLDVEISYKDES	>SA02_3P54_11795_sem_NODE_6:c173069-172353 NODE_6_length_207260_cov_80.713755 ATGAAAAGAATACTTATCATTGTTGTTTTATTGTTTTGCTATTCGCAAAATCATATCGCAACCGCTGATG TCGGAGTTTTGAATCTTAGGAACTATTATGGTAGCTATCCAATTGAAGACCACCAAAGTATTAATCCTGA AAATAATCATCTTTCGCATCAATTAGTTTTTTCTATGGATAATTCGACAGTAACAGCTGAATTTAAGAAC GTTGATGATGTAAAGAAATTCAAAAATCATGCTGTAGATGTATATGGTCTAAGTTATAGTGGATATTGTT TGAAAAACAAATATATATACGGTGGAGTTACATTAGC…	716/717, 99% nt identity with AF285760.1; 238/239 aa identity with AAG36952.1; Jarraud et al., 2001	-	-	-	-	-	-	>SA08_KQP42_01795_sem MKRILIIVVLLFCYSQNHIATADVGVLNLRNYYGSYPIEDHQSI NPENNHLSHQLVFSMDNSTVTAEFKNVDDVKKFKNHAVDVYGLSYSGYCLKNKYIYGG VTLAGDYLEKSRRIPINLWVNGEHQTISTDKVSTNKKLVTAQEIDTKLRRYLQEEYNI YGFNDTNKGRNYGNKSKFSSGFNAGKILFHLNDGSSFSYDLFDTGTGQAESFLKIYND NKTVETEKFHLDVEISYKDES	>SA08_KQP42_01795_sem_NODE_12:35876-36592 ATGAAAAGAATACTTATCATTGTTGTTTTATTGTTTTGCTATTCGCAAAATCATATCGCAACCGCTGATG TCGGAGTTTTGAATCTTAGGAACTATTATGGTAGCTATCCAATTGAAGACCACCAAAGTATTAATCCTGA AAATAATCATCTTTCGCATCAATTAGTTTTTTCTATGGATAATTCGACAGTAACAGCTGAATTTAAGAAC GTTGATGATGTAAAGAAATTCAAAAATCATGCTGTAGATGTATATGGTCTAAGTTATAGTGGATATTGTT TGAAAAACAAATATATATACGGTGGAGTTACATTAGCAGGTGATTATTTAGAGAAATCTAGACGTATTCC TA…	716/717, 99% nt identity with AF285760.1; 238/239, 99% aa identity with AAG36952.1; Jarraud et al., 2001	-	-	-	-	-	-	-	-	-	>SA24_J3135_04210_sem MKRILIIVVLLFCYSQNHIATADVGVLNLRNYYGSYPIEDHQSI NPENNHLSHQLVFSMDNSTVTAEFKNVDDVKKFKNHAVDVYGLSYSGYCLKNKYIYGG VTLAGDYLEKSRRIPINLWVNGEHQTISTDKVSTNKKLVTAQEIDTKLRRYLQEEYNI YGFNDTNKGRNYGNKSKFSSGFNAGKILFHLNDGSSFSYDLFDTGTGQAESFLKIYND NKTVETEKFHLDVEISYKDES	>SA24_J3135_04210_sem_NODE_4:34708-35424 ATGAAAAGAATACTTATCATTGTTGTTTTATTGTTTTGCTATTCGCAAAATCATATCGCAACCGCTGATG TCGGAGTTTTGAATCTTAGGAACTATTATGGTAGCTATCCAATTGAAGACCACCAAAGTATTAATCCTGA AAATAATCATCTTTCGCATCAATTAGTTTTTTCTATGGATAATTCGACAGTAACAGCTGAATTTAAGAAC GTTGATGATGTAAAGAAATTCAAAAATCATGCTGTAGATGTATATGGTCTAAGTTATAGTGGATATTGTT TGAAAAACAAATATATATACGGTGGAGTTACATTAGCAGGTGATTATTTAGAGAAATCTAGACGTATTCC TAT…	716/717, 99% nt identity with AF285760.1; 238/239, 238/239, 99% aa identity with AAG36952.1; Jarraud et al., 2001	-	-	-	>SA51_J3T04_07850_sem MKRILIIVVLLFCYSQNHIATADVGVLNLRNYYGSYPIEDHQSI NPENNHLSHQLVFSMDNSTVTAEFKNVDDVKKFKNHAVDVYGLSYSGYCLKNKYIYGG VTLAGDYLEKSRRIPINLWVNGEHQTISTDKVSTNKKLVTAQEIDTKLRRYLQEEYNI YGFNDTNKGRNYGNKSKFSSGFNAGKILFHLNDGSSFSYDLFDTGTGQAESFLKIYND NKTVETEKFHLDVEISYKDES	>SA51_J3T04_07850_sem_NODE_14:c19920-19204 ATGAAAAGAATACTTATCATTGTTGTTTTATTGTTTTGCTATTCGCAAAATCATATCGCAACCGCTGATG TCGGAGTTTTGAATCTTAGGAACTATTATGGTAGCTATCCAATTGAAGACCACCAAAGTATTAATCCTGA AAATAATCATCTTTCGCATCAATTAGTTTTTTCTATGGATAATTCGACAGTAACAGCTGAATTTAAGAAC GTTGATGATGTAAAGAAATTCAAAAATCATGCTGTAGATGTATATGGTCTAAGTTATAGTGGATATTGTT TGAAAAACAAATATATATACGGTGGAGTTACATTAGCAGGTGATTATTTAGAGAAATCTAGACGTATTCC T…	716/717, 99% nt identitywith AF285760.1; 238/239, 99% aa identity with AAG36952.1; Jarraud et al., 2001	>SA82_KQP39_04545_sem MKRILIIVVLLFCYSQNHIATADVGVLNLRNYYGSYPIEDHQSI NPENNHLSHQLVFSMDNSTVTAEFKNVDDVKKFKNHAVDVYGLSYSGYCLKNKYIYGG VTLAGDYLEKSRRIPINLWVNGEHQTISTDKVSTNKKLVTAQEIDTKLRRYLQEEYNI YGFNDTNKGRKYGNKSKFSSGFNAGKILFHLNDGSSFSYDLFDTGTGQAESFLKIYND NKTVETEKFHLDVEISYKDES	>SA82_KQP39_04545_sem_NODE_18:34337-35053 ATGAAAAGAATACTTATCATTGTTGTTTTATTGTTTTGCTATTCGCAAAATCATATCGCAACCGCTGATG TCGGAGTTTTGAATCTTAGGAACTATTATGGTAGCTATCCAATTGAAGACCACCAAAGTATTAATCCTGA AAATAATCATCTTTCGCATCAATTAGTTTTTTCTATGGATAATTCGACAGTAACAGCTGAATTTAAGAAC GTTGATGATGTAAAGAAATTCAAAAATCATGCTGTAGATGTATATGGTCTAAGTTATAGTGGATATTGTT TGAAAAACAAATATATATACGGTGGAGTTACATTAGCAGGTGATTATTTAGAGAAATCTAGACGTATTCC TA…	715/717, 99% nt identity with AF285760.1; 237/239, 99% aa identity with AAG36952.1; Jarraud et al., 2001
Enterotoxin N	sen	-	-	-	>SA02_3P54_11780_sen MRLFYIAAIIITLLCLINNNYVNAEVDKKDLKKKSDLDSSKLFN LTSYYTDITWQLDESNKISTDQLLNNTIILKNIDISVLKTSSLKVEFNSSDLANQFKG KNIDIYGLYFGNKCVGLTEEKTSCLYGGVTIHDGNQLDEEKVIGVNVFKDGVQQEGFV IKTKKAKVTVQELDTKVRFKLENLYKIYNKDTGNIQKGCIFFHSHNHQDQSFYYDLYN VKGSVGAEFFQFYSDNRTVSSSNYHIDVFLYKD	>SA02_3P54_11780_sen_NODE_6:c170623-169871 ATGAGATTGTTCTACATAGCTGCAATTATAATAACTTTATTATGTCTTATTAATAATAATTATGTTAATG CTGAAGTAGACAAAAAAGATTTAAAGAAAAAATCTGATCTAGATAGTAGTAAGTTATTTAATTTAACAAG CTATTATACTGATATAACGTGGCAATTAGACGAGTCAAATAAAATTAGTACAGATCAACTACTGAATAAT ACTATAATATTAAAAAATATTGATATATCCGTACTTAAAACTTCTAGTTTGAAAGTTGAGTTTAACTCAT CAGATTTAGCAAATCAATTTAAAGGAAAAAATATAGATATTTATGGACTGTATTTTGGAAATAAATGTGT A…	753/753, 100% nt identity with sen of AF285760.1; Jarraud et al., 2001	-	-	-	-	-	-	>SA08_KQP42_01810_sen MRLFYIAAIIITLLCLINNNYVNAEVDKKDLKKKSDLDSSKLFN LTSYYTDITWQLDESNKISTDQLLNNTIILKNIDISVLKTSSLKVEFNSSDLANQFKG KNIDIYGLYFGNKCVGLTEEKTSCLYGGVTIHDGNQLDEERVIGVNVFKDGVQQEGFV IKTKKAKVTVQELDTKVRFKLENLYKIYNKDTGNIQKGCIFFHSHNHQDQSFYYDLYN VKGSVGAEFFQFYSDNRTVSSSNYHIDVFLYKD	>SA08_KQP42_01810_sen_NODE_12:38321-39073 ATGAGATTGTTCTACATAGCTGCAATTATAATAACTTTATTATGTCTTATTAATAATAATTATGTTAATG CTGAAGTAGACAAAAAAGATTTAAAGAAAAAATCTGATCTAGATAGTAGTAAGTTATTTAATTTAACAAG CTATTATACTGATATAACGTGGCAATTAGACGAGTCAAATAAAATTAGTACAGATCAACTACTGAATAAT ACTATAATATTAAAAAATATTGATATATCCGTACTTAAAACTTCTAGTTTGAAAGTTGAGTTTAACTCAT CAGATTTAGCAAATCAATTTAAAGGAAAAAATATAGATATTTATGGACTGTATTTTGGAAATAAATGTGT AG…	752/753, 99% nt identity with AF285760.1; 250/251, 99% aa identity with AAG36956.1; Jarraud et al., 2001	-	-	-	-	-	-	-	-	-	>SA24_J3135_04225_sen MRLFYIAAIIITLLCLINNNYVNAEVDKKDLKKKSDLDSSKLFN LTSYYTDITWQLDESNKISTDQLLNNTIILKNIDISVLKTSSLKVEFNSSDLANQFKG KNIDIYGLYFGNKCVGLTEEKTSCLYGGVTIHDGNQLDEERVIGVNVFKDGVQQEGFV IKTKKAKVTVQELDTKVRFKLENLYKIYNKDTGNIQKGCIFFHSHNHQDQSFYYDLYN VKGSVGAEFFQFYSDNRTVSSSNYHIDVFLYKD	>SA24_J3135_04225_sen_NODE_4:37153-37905 ATGAGATTGTTCTACATAGCTGCAATTATAATAACTTTATTATGTCTTATTAATAATAATTATGTTAATG CTGAAGTAGACAAAAAAGATTTAAAGAAAAAATCTGATCTAGATAGTAGTAAGTTATTTAATTTAACAAG CTATTATACTGATATAACGTGGCAATTAGACGAGTCAAATAAAATTAGTACAGATCAACTACTGAATAAT ACTATAATATTAAAAAATATTGATATATCCGTACTTAAAACTTCTAGTTTGAAAGTTGAGTTTAACTCAT CAGATTTAGCAAATCAATTTAAAGGAAAAAATATAGATATTTATGGACTGTATTTTGGAAATAAATGTGT AGG…	752/753, 99% nt identity with AF285760.1; 250/251, 99% aa identity with AAG36956.1; Jarraud et al., 2001	-	-	-	>SA51_J3T04_07835_sen MRLFYIAAIIITLLCLINNNYVNAEVDKKDLKKKSDLDSSKLFN LTSYYTDITWQLDESNKISTDQLLNNTIILKNIDISVLKTSSLKVEFNSSDLANQFKG KNIDIYGLYFGNKCVGLTEEKTSCLYGGVTIHDGNQLDEEKVIGVNVFKDGVQQEGFV IKTKKAKVTVQELDTKVRFKLENLYKIYNKDTGNIQKGCIFFHSHNHQDQSFYYDLYN VKGSVGAEFFQFYSDNRTVSSSNYHIDVFLYKD	>SA51_J3T04_07835_sen_NODE_14:c17474-16722 ATGAGATTGTTCTACATAGCTGCAATTATAATAACTTTATTATGTCTTATTAATAATAATTATGTTAATG CTGAAGTAGACAAAAAAGATTTAAAGAAAAAATCTGATCTAGATAGTAGTAAGTTATTTAATTTAACAAG CTATTATACTGATATAACGTGGCAATTAGACGAGTCAAATAAAATTAGTACAGATCAACTACTGAATAAT ACTATAATATTAAAAAATATTGATATATCCGTACTTAAAACTTCTAGTTTGAAAGTTGAGTTTAACTCAT CAGATTTAGCAAATCAATTTAAAGGAAAAAATATAGATATTTATGGACTGTATTTTGGAAATAAATGTGT A…	753/753, 100% nt identity with AF285760.1; Jarraud et al., 2001	>SA82_KQP39_04560_sen MRLFYIAAIIITLLCLINNNYVNAEVDKKDLKKKSDLDSSKLFN LTSYYTDITWQLDESNKISTDQLLNNTIILKNIDISVLKTSSLKVEFNSSDLANQFKG KNIDIYGLYFGNKCVGLTEEKTSCLYGGVTIHDGNQLDEEKVIGVNVFKDGVQQEGFV IKTKKAKVTVQELDTKVRFKLENLYKIYNKDTGNIQKGCIFFHSHNHQDQSFYYDLYN VKGSVGAEFFQFYSDNRTVSSSNYHIDVFLYKD	>SA82_KQP39_04560_sen_NODE_18:36782-37534 ATGAGATTGTTCTACATAGCTGCAATTATAATAACTTTATTATGTCTTATTAATAATAATTATGTTAATG CTGAAGTAGACAAAAAAGATTTAAAGAAAAAATCTGATCTAGATAGTAGTAAGTTATTTAATTTAACAAG CTATTATACTGATATAACGTGGCAATTAGACGAGTCAAATAAAATTAGTACAGATCAACTACTGAATAAT ACTATAATATTAAAAAATATTGATATATCCGTACTTAAAACTTCTAGTTTGAAAGTTGAGTTTAACTCAT CAGATTTAGCAAATCAATTTAAAGGAAAAAATATAGATATTTATGGACTGTATTTTGGAAATAAATGTGT AG…	753/753, 100% nt identity with AF285760.1; Jarraud et al., 2001
Enterotoxin O	seo	-	-	-	>SA02_3P54_11800_seo MKNSKVMLNVLLLILNLIAICSVNNAYANEEDPKIESLCKKSSV DPIALHNINDDYINNRFTTVKSIVSTTEKFLDFDLLFKSINWLDGISAEFKDLKVEFS SSAISKEFLGKTVDIYGVYYKAHCHGEHQVDTACTYGGVTPHENNKLSEPKNIGVAVY KDNVNVNTFIVTTDKKKVTAQELDIKVRTKLNNAYKLYDRMTSDVQKGYIKFHSHSEH KESFYYDLFYIKGNLPDQYLQIYNDNKTIDSSDYHIDVYLFT	SA02_3P54_11800_seo_NODE_6:c174132-173353 ATTAAAAATAGTAAAGTAATGTTAAATGTATTATTATTAATTTTAAATTTAATTGCAATATGTAGTGTAA ACAATGCATATGCAAATGAAGAAGATCCTAAAATAGAGAGTTTGTGTAAGAAGTCAAGTGTAGACCCTAT TGCTTTACATAATATTAATGATGATTATATAAATAATCGATTTACGACAGTAAAATCAATTGTATCAACT ACAGAAAAATTCTTAGACTTCGATTTATTATTTAAAAGTATTAATTGGTTAGATGGAATATCTGCTGAAT TTAAAGATTTAAAAGTGGAATTTAGCTCATCAGCGATTTCTAAAGAATTTCTAGGAAAGACTGTTGATAT TT…	780/780, 100% nt identity with AF285760.1; Jarraud et al., 2001	-	-	-	-	-	-	>SA08_KQP42_01790_seo MKNSKVMLNVLLLILNLIAICSVNNAYANEEDPKIESLCKKSSV DPIALHNINDDYINNRFTTVKSIVSTTEKFLDFDLLFKSINWLDGISAKFKDLKVEFS SSAISKEFLGKTVDIYGVYYKAHCHGEHQVDTACTYGGVTPHENNKLSEPKNIGVAVY KDNVNVNTFIVTTDKKKVTAQELDIKVRTKLNNAYKLYDRMTSDVQKGYIKFHSHSEH KESFYYDLFYIKGNLPDQYLQIYNDNKTIDSSDYHIDVYLFT	>SA08_KQP42_01790_seo_NODE_12:34813-35592 ATTAAAAATAGTAAAGTAATGTTAAATGTATTATTATTAATTTTAAATTTAATTGCAATATGTAGTGTAA ACAATGCATATGCAAATGAAGAAGATCCTAAAATAGAGAGTTTGTGTAAGAAGTCAAGTGTAGACCCTAT TGCTTTACATAATATTAATGATGATTATATAAATAATCGATTTACGACAGTAAAATCAATTGTATCAACT ACAGAAAAATTCTTAGACTTCGATTTATTATTTAAAAGTATTAATTGGTTAGATGGAATATCTGCTAAAT TTAAAGATTTAAAAGTGGAATTTAGCTCATCAGCGATTTCTAAAGAATTTCTAGGAAAGACTGTTGATAT TT…	777/780, 99% nt identity with AF285760.1; 258/260, 99% aa identity with AAG36951.1; Jarraud et al., 2001	-	-	-	-	-	-	-	-	-	>SA24_J3135_04205_seo MKNSKVMLNVLLLILNLIAICSVNNAYANEEDPKIESLCKKSSV DPIALHNINDDYINNRFTTVKSIVSTTEKFLDFDLLFKSINWLDGISAKFKDLKVEFS SSAISKEFLGKTVDIYGVYYKAHCHGEHQVDTACTYGGVTPHENNKLSEPKNIGVAVY KDNVNVNTFIVTTDKKKVTAQELDIKVRTKLNNAYKLYDRMTSDVQKGYIKFHSHSEH KESFYYDLFYIKGNLPDQYLQIYNDNKTIDSSDYHIDVYLFT	>SA24_J3135_04205_seo_NODE_4:33645-34424 ATTAAAAATAGTAAAGTAATGTTAAATGTATTATTATTAATTTTAAATTTAATTGCAATATGTAGTGTAA ACAATGCATATGCAAATGAAGAAGATCCTAAAATAGAGAGTTTGTGTAAGAAGTCAAGTGTAGACCCTAT TGCTTTACATAATATTAATGATGATTATATAAATAATCGATTTACGACAGTAAAATCAATTGTATCAACT ACAGAAAAATTCTTAGACTTCGATTTATTATTTAAAAGTATTAATTGGTTAGATGGAATATCTGCTAAAT TTAAAGATTTAAAAGTGGAATTTAGCTCATCAGCGATTTCTAAAGAATTTCTAGGAAAGACTGTTGATAT TTA…	779/780, 99% nt identity with AF285760.1; 258/260, 99% aa identity with AAG36951.1; Jarraud et al., 2001	-	-	-	>SA51_J3T04_07855_seo MKNSKVMLNVLLLILNLIAICSVNNAYANEEDPKIESLCKKSSV DPIALHNINDDYINNRFTTVKSIVSTTEKFLDFDLLFKSINWLDGISAEFKDLKVEFS SSAISKEFLGKTVDIYGVYYKAHCHGEHQVDTACTYGGVTPHENNKLSEPKNIGVAVY KDNVNVNTFIVTTDKKKVTAQELDIKVRTKLNNAYKLYDRMTSDVQKGYIKFHSHSEH KESFYYDLFYIKGNLPDQYLQIYNDNKTIDSSDYHIDVYLFT	>SA51_J3T04_07855_seo_NODE_14:c20983-20204 ATTAAAAATAGTAAAGTAATGTTAAATGTATTATTATTAATTTTAAATTTAATTGCAATATGTAGTGTAA ACAATGCATATGCAAATGAAGAAGATCCTAAAATAGAGAGTTTGTGTAAGAAGTCAAGTGTAGACCCTAT TGCTTTACATAATATTAATGATGATTATATAAATAATCGATTTACGACAGTAAAATCAATTGTATCAACT ACAGAAAAATTCTTAGACTTCGATTTATTATTTAAAAGTATTAATTGGTTAGATGGAATATCTGCTGAAT TTAAAGATTTAAAAGTGGAATTTAGCTCATCAGCGATTTCTAAAGAATTTCTAGGAAAGACTGTTGATAT T…	780/780, 100% nt identity with AF285760.1; Jarraud et al., 2001	>SA82_KQP39_04540_seo MKNSKVMLNVLLLILNLIAICSVNNAYANEEDPKIESLCKKSSV DPIALHNINDDYINNRFTTVKSIVSTTEKFLDFDLLFKSINWLDGISAEFKDLKVEFS SSAISKEFLGKTVDIYGVYYKAHCHGEHQVDTACTYGGVTPHENNKLSEPKNIGVAVY KDNVNVNTFIVTTDKKKVTAQELDIKVRTKLNNAYKLYDRMTSDVQKGYIKFHSHSEH KESFYYDLFYIKGNLPDQYLQIYNDNKTIDSSDYHIDVYLFT	>SA82_KQP39_04540_seo_NODE_18:33274-34053 ATTAAAAATAGTAAAGTAATGTTAAATGTATTATTATTAATTTTAAATTTAATTGCAATATGTAGTGTAA ACAATGCATATGCAAATGAAGAAGATCCTAAAATAGAGAGTTTGTGTAAGAAGTCAAGTGTAGACCCTAT TGCTTTACATAATATTAATGATGATTATATAAATAATCGATTTACGACAGTAAAATCAATTGTATCAACT ACAGAAAAATTCTTAGACTTCGATTTATTATTTAAAAGTATTAATTGGTTAGATGGAATATCTGCTGAAT TTAAAGATTTAAAAGTGGAATTTAGCTCATCAGCGATTTCTAAAGAATTTCTAGGAAAGACTGTTGATAT TT…	780/780, 100% nt identity with AF285760.1; Jarraud et al., 2001
Enterotoxin Q	seq	-	-	-	-	-	-	>SA04_J3T03_02540_seq MNKIFRVLTVSLFFFTFLIKNNLAYADVGVINLRNFYANYQPEK LQGVSSGNFSTSHQLEYIDGKYTLYSQFHNEYEAKRLKDHKVDIFGISYSGLCNTKYM YGGITLANQNLDKPRNIPINLWVNGKQNTISTDKVSTQKKEVTAQEIDIKLRKYLQNE YNIYGFNKTKKGQEYGYKSKFNSGFNKGKITFHLNNEPSFTYDLFYTGTGQAESFLKI YNDNKTIDAENFHLDVEISYEKTE	>SA04_J3T03_02540_seq_NODE_3:c50933-50208 ATGAATAAAATATTTAGAGTTCTCACTGTTAGCTTGTTTTTCTTCACATTTTTAATAAAAAACAATCTAG CATATGCTGATGTAGGGGTAATCAATCTTAGAAACTTTTATGCTAATTATCAACCTGAAAAGCTTCAAGG AGTTAGTTCTGGAAATTTTTCTACTTCTCATCAATTAGAGTATATTGATGGAAAATACACTTTATATTCA CAGTTTCATAATGAATATGAAGCGAAGAGATTAAAAGATCATAAAGTAGATATCTTTGGAATAAGTTACT CAGGTCTTTGTAATACAAAATATATGTATGGTGGAATTACGTTGGCAAATCAAAATTTAGATAAACCTAG AA…	726/726, 100% nt identity with CP043920.1:2074067-2074792; Egyir et al., 2021	-	-	-	-	-	-	-	-	-	-	-	-	-	-	-	-	-	-	-	-	-	-	-	-	-	-	-
Enterotoxin R	ser	-	-	-	-	-	-	-	-	-	-	-	-	-	-	-	-	-	-	-	-	-	>SA20_J3T02_03350_ser MLNKILLLLLSVTFMLLFFSLHSVSAKPDPRPGELNRVSDYKKN KGTMGNVESLYKDKAVIAENVKNTRQFLGHDLIFPIPYSEYKEVKSEFINKKTADKFK DKRLDVFGIPYFYTCLVPKNESREEFIFDGVCIYGGVTMHSTADSISKNIIVPVTVDN KQQFSFTISTNKKTVTVQELDYKVRNWLTNNKKLYEFDGSAYETGYIKFIEENKDSFW YDLFPKKDLVPFIPYKFVNIYGDNKTIDASSVKIEVHLTTT	>SA20_J3T02_03350_ser_NODE_17:363-1139 ATGTTAAATAAAATCTTACTTTTATTGCTCTCTGTTACTTTTATGTTGTTATTTTTCTCTTTACATTCAG TAAGTGCTAAACCAGATCCAAGACCTGGAGAATTGAATAGAGTTAGTGATTATAAAAAAAACAAAGGTAC TATGGGGAATGTTGAATCCTTATATAAGGATAAAGCGGTAATAGCAGAAAATGTTAAAAATACTAGACAA TTCTTAGGACATGATTTGATTTTTCCTATTCCTTATTCAGAATACAAAGAAGTTAAAAGTGAATTTATAA ATAAAAAAACAGCTGATAAATTTAAAGACAAACGGTTAGATGTGTTTGGAATACCCTATTTTTATACATG TTTAG…	777/777, 100% nt identity with LC377536.1:c9783-9004; Wan et al., 2021	-	-	-	-	-	-	-	-	-	-	-	-
Enterotoxin-like toxin U2	selu2	-	-	-	-	-	-	-	-	-	-	-	-	>SA08_KQP42_01805_selu2 MKLFAFIFICVKSCSLLFMLNGNPKPEQLNKASEFTGLMDNMRYLYDDKHVSETNIKSQEKFLQHDLLFKINGSKILKTEFNNKSLSDKYKNKNVDLFGTNYYNQCYFSSDNMELNDGRLIEKTCMYGGVTEHDGNQIDKNNSTDNSHNILIKVYENERNSLSFDIPTNKKNITAQEIDYKVRNYLLKHKNLYEFNSSPYETGYIKFIEGSGHSFWYDLMPESGKKFYPTKYLLIYNDNKTVESKSINVEVHLTKK	>SA08_KQP42_01805_selu2_NODE_12:37512-38279 ATGAAGTTATTTGCCTTTATCTTCATATGTGTTAAGTCTTGCAGCTTACTATTTATGTTAAATGGCAATC CTAAACCAGAACAATTGAATAAAGCGAGTGAATTCACTGGTCTAATGGATAATATGAGGTATTTGTATGA TGATAAACACGTATCAGAAACAAACATTAAATCCCAAGAAAAGTTTTTACAACATGATTTATTATTTAAA ATAAATGGTTCTAAAATTTTAAAAACAGAATTTAATAATAAAAGCCTTTCGGATAAATATAAAAATAAAA ACGTAGATTTGTTTGGGACAAACTATTATAATCAATGCTATTTTTCATCGGATAATATGGAATTAAATGA …	767/768, 99% nt identity with selu2 EF030428; 256/256, 100% aa identity with the corresponding ABK27166.1;Thomas et al., 2006	-	-	-	-	-	-	-	-	-	>SA24_J3135_04220_selu2 MKLFAFIFICVKSCSLLFMLNGNPKPEQLNKASEFTGLMDNMRYLYDDKHVSETNIKSQEKFLQHDLLFKINGSKILKTEFNNKSLSDKYKNKNVDLFGTNYYNQCYFSSDNMELNDGRLIEKTCMYGGVTEHDGNQIDKNNSTDNSHNILIKVYENERNSLSFDIPTNKKNITAQEIDYKVRNYLLKHKNLYEFNSSPYETGYIKFIEGSGHSFWYDLMPESGKKFYPTKYLLIYNDNKTVESKSINVEVHLTKK	>SA24_J3135_04220_selu2_NODE_4:36344-37111 ATGAAGTTATTTGCCTTTATCTTCATATGTGTTAAGTCTTGCAGCTTACTATTTATGTTAAATGGCAATC CTAAACCAGAACAATTGAATAAAGCGAGTGAATTCACTGGTCTAATGGATAATATGAGGTATTTGTATGA TGATAAACACGTATCAGAAACAAACATTAAATCCCAAGAAAAGTTTTTACAACATGATTTATTATTTAAA ATAAATGGTTCTAAAATTTTAAAAACAGAATTTAATAATAAAAGCCTTTCGGATAAATATAAAAATAAAA ACGTAGATTTGTTTGGGACAAACTATTATAATCAATGCTATTTTTCATCGGATAATATGGAATTAAATGA T…	767/768, 99% nt identity with selu2 EF030428; 256/256, 100% aa identity with the corresponding ABK27166.1;Thomas et al., 2006	-	-	-	-	-	-	>SA82_KQP39_04555_selu2 MKLFAFIFICVKSCSLLFMLNGNPKPEQLNKASEFTGLMDNMRYLYDDKHVSETNIKSQEKFLQHDLLFKISGSKILKTEFNNKSLSDKYKNKNVDLFGTNYYNQCYFSSDNMELNDGRLIEKTCMYGGVTEHDGNQIDKNNSTDNSHNILIKVYENERNSLSFDIPTNKKNITAQEIDYKVRNYLLKHKNLYEFNSSPYETGYIKFIEGSGHSFWYDLMPESGKKFYPTKYLLIYNDNKTVESKSINVEVHLTKK	>SA82_KQP39_04555_selu2_NODE_18:35973-36740 ATGAAGTTATTTGCCTTTATCTTCATATGTGTTAAGTCTTGCAGCTTACTATTTATGTTAAATGGCAATC CTAAACCAGAACAATTGAATAAAGCGAGTGAATTCACTGGTCTAATGGATAATATGAGGTATTTGTATGA TGATAAACACGTATCAGAAACAAACATTAAATCCCAAGAAAAGTTTTTACAACATGATTTATTATTTAAA ATAAGTGGTTCTAAAATTTTAAAAACAGAATTTAATAATAAAAGCCTTTCGGATAAATATAAAAATAAAA ACGTAGATTTGTTTGGGACAAACTATTATAATCAATGCTATTTTTCATCGGATAATATGGAATTAAATGA …	766/768, 99% nt identity with selu2 EF030428; 255/256, 99% aa identity with ABK27166.1; Thomas et al., 2006
Enterotoxin Y	sey	-	-	-	-	-	-	-	-	-	-	-	-	-	-	-	-	-	-	-	-	-	-	-	-	-	-	-	>SA46_J3T00_13960_sey MKAKLWFLLTTLAFLIAVTGSIGIAEVKAKTTGLITENSNDSLK EHYAQKFEVYTNKEVTGVGENYIDAKVDTYNVRTVLYNTDYLKQFKNQDKVNIWGTLY ENQQSKVYRGTVVKYDPISKVTNLSYRMNLFVNGHQTKVNPDSLLEVKNKQISLKETD FRIRKYLLEKEHLYSNYNSGELIIEMKNGARHKIDLGDILSDSQEKTFDFDNISHIDI YMK	>SA46_J3T00_13960_sey_NODE_11:c59312-58650 ATGAAAGCTAAACTATGGTTTTTGTTGACAACTTTGGCATTTTTGATTGCAGTAACGGGATCTATTGGAA TAGCAGAAGTAAAAGCAAAAACAACTGGATTGATTACAGAAAATAGTAATGACAGTTTAAAAGAGCATTA TGCACAAAAATTTGAAGTTTATACGAATAAAGAAGTAACAGGAGTTGGGGAAAATTATATAGACGCGAAA GTTGACACCTACAATGTACGGACAGTGCTCTACAACACTGATTATTTGAAACAGTTTAAAAATCAAGACA AAGTTAATATATGGGGAACATTATATGAAAACCAACAATCTAAAGTATATCGTGGTACAGTAGTTAAGTA T…	663/663, 100% nt identity with CP054876.1:c2602334-2601669 (Gawlik et al., 2020)	-	-	-	-	-	-
Enterotoxin-like toxin W	selw	>SA01_KQP40_07820_selw MNNCFGEFEVKYLTGFILILLLEEILTNSASAIEYSDLHHKSKFDSKRLSNAKMSFINPTQLENKNTNDRLLKHDLLFHDMFVNDDWKKDFKVEFENEALSKKFINKDIDIFAGNYGYGCHGGATNKTQCSYGGVTLSDNNKYDDYKNIPCNLWIDGHQAEIELTAVKTKKKIVTIQELDVQLRNYLNEKYKLYEQGGDIVKGYVKYHNDDEQNIEYNFYNLNGEYGYEILKMYADNKTINSDKLHLDIYLFKS	>SA01_KQP40_07820_selw_NODE_3:199109-199870 ATTAATAATTGTTTTGGGGAGTTTGAAGTTAAATATTTAACAGGATTTATTTTAATATTATTGTTAGAAG AAATTTTGACAAATTCAGCAAGTGCAATCGAATATTCAGACTTACATCATAAAAGTAAGTTTGATTCAAA GCGTCTAAGTAATGCTAAGATGTCATTCATCAATCCAACTCAGCTTGAAAATAAAAACACAAACGATAGA CTGTTGAAGCATGATTTGTTATTTCATGACATGTTCGTAAATGATGATTGGAAAAAAGATTTTAAAGTTG AATTCGAAAATGAGGCACTTTCAAAGAAATTTATAAATAAGGATATCGATATATTTGCTGGAAATTATGG …	762/762, 100% nt identity with KX655702 (selw group 3); Aung et al., 2017	J3P54_04625*	>SA02_J3P54_04625*_selw*_NODE_3:c191861..192614 TTATGATTTGAATAAATAGATATCTAAATGCAATTTGTCTCTATTGATAGTTTTATTATCAGCATACATT TTTAATACCTCATAACCATACTCACCATTTAAATTATAAAAATCATATTCTACATTTTGTTCATCATCAT TATGATATTTAACATACCCTTTAACAATGTCGCCACCTTGTTCGTACAACTTATACTTCTCATTCAAATA ATTTCTTAATTGAACATCTAATTCTTGAATGGTAACAATTTTCTTTTTTCGTTTTTACTGCAGTTAGTTC TATTTCTGTTTGATGTCCGTCAATCCATAAATTAGAAGGTATATTCTTATAATCATCTTATTTATTA…	754/754, 100% nt identity with KX655714.1 (non functional selw group 4); Aung et al., 2017	>SA04_J3T03_08970_selw MNNCFGEFEVKYLTGFILILLLEEILTNSASAIEYSDLHHKSKF DSKRLSNAKMSFINPTQLENKNTNDRLLKHDLLFHDMFVNDDWKKDFKVEFENEALSK KFINKDIDIFAGNYGYGCHGGATNKTQCSYGGVTLSDNNKYDDYKNIPCNLWIDGHQA EIELTAVKTKKKIVTIQELDVQLRNYLNEKYKLYEQGGDIVKGYVKYHNDDEQNIEYN FYNLNGEYGYEVLKMYADNKTINSDKLHLDIYLFKS	>SA04_J3T03_08970_selw_NODE_1:147283-148044 ATTAATAATTGTTTTGGGGAGTTTGAAGTTAAATATTTAACAGGATTTATTTTAATATTATTGTTAGAAG AAATTTTGACAAATTCAGCAAGTGCAATCGAATATTCAGACTTACATCATAAAAGTAAGTTTGATTCAAA GCGTCTAAGTAATGCTAAGATGTCATTCATCAATCCAACTCAGCTTGAAAATAAAAACACAAACGATAGA CTGTTGAAGCATGATTTGTTATTTCATGACATGTTCGTAAATGATGATTGGAAAAAAGATTTTAAAGTTG AATTCGAAAATGAGGCACTTTCAAAGAAATTTATAAATAAGGATATCGATATATTTGCTGGAAATTATGG …	762/762 100% nt identity with KX655703.1 (selw group 3); Aung et al., 2017	>SA07_KQP41_05845_selw MNNCFGEFEVKYLTGFILILLLEEILTNSASAIEYSDLHHKSKF DSKRLSNAKMSFINPTQLENKNTNDRLLKHDLLFHDMFVNDDWKKDFKVEFENEALSK KFINKDIDIFAGNYGYGCHGGATNKTQCSYGGVTLSDNNKYDDYKNIPCNLWIDGHQA EIELTAVKTKKKIVTIQELDVQLRNYLNEKYKLYEQGGDIVKGYVKYHNDDEQNIEYN FYNLNGEYGYEILKMYADNKTINSDKLHLDIYLFKS	>SA07_KQP41_05845_selw_NODE_3:c51842-51081 ATTAATAATTGTTTTGGGGAGTTTGAAGTTAAATATTTAACAGGATTTATTTTAATATTATTGTTAGAAG AAATTTTGACAAATTCAGCAAGTGCAATCGAATATTCAGACTTACATCATAAAAGTAAGTTTGATTCAAA GCGTCTAAGTAATGCTAAGATGTCATTCATCAATCCAACTCAGCTTGAAAATAAAAACACAAACGATAGA CTGTTGAAGCATGATTTGTTATTTCATGACATGTTCGTAAATGATGATTGGAAAAAAGATTTTAAAGTTG AATTCGAAAATGAGGCACTTTCAAAGAAATTTATAAATAAGGATATCGATATATTTGCTGGAAATTATGG A…	762/762, 100% nt identity with KX655702.1 (selw group 3); Aung et al., 2017	>SA08_KQP42_09010_selw MGEFEVKYLTGFILILLLEGIFTNSASAIEYSDLHHKSKLNSKR LYNAKVSFANPTDLENKKTNDRLLKHDLLFHDMFVNDDWKKEFKVEFENEALSKKFIN KDIDIFAGNYGYGCHGGATNKTQCSYGGVTLSDNNKYDDYKNIPCNLWIDGHQTEIEL TAVKTKKKIVTIQELEVQLRNYLNEKYKLYEQGGDIVKGYVKYYNDDEQNVEYDFYNL NGEYGREVLKMYADNKTINSDKLHLDIYLFKS	>SA08_KQP42_09010_selw_NODE_5:44959-45708 TTGGGGGAGTTTGAAGTTAAATATTTAACAGGATTTATTTTAATATTATTGTTAGAAGGAATTTTTACAA ATTCAGCAAGTGCAATCGAATATTCAGACTTACATCATAAAAGTAAACTAAATTCAAAGCGTCTATATAA TGCTAAGGTGTCATTTGCTAATCCAACTGATCTTGAAAATAAAAAAACAAACGATAGACTGTTGAAGCAT GATTTGTTATTTCATGACATGTTCGTAAATGATGATTGGAAAAAGGAGTTTAAAGTTGAATTCGAAAATG AGGCACTTTCAAAGAAATTTATAAATAAGGATATCGATATATTTGCTGGAAATTATGGATACGGATGTCA TG…	735/750, 98% nt identity with KX655716.1; 221/234, 94% aa identity with ASK05484.1 (selw group 1); Aung et al., 2017	>SA10_KQP37_08560_selw MGEFEVKYLTGFILILLLEGIFTNSASAIEYSDLHHKSKLNSKR LSNAKMSFINPTQLENKNTNDRLLKHDLLFHDMFVNDDWKKDFKVEFENEALSKKFIN KDIDIFAGSYSYECHGGATNKTQCSYGGVTLSDNNKYDDYKNIPCNLWIDGHQTEIEL TAVKTKKKIVTIQELEVQLRNYLNEKYKLYEQGGDIVKGYVKYYNDDEQNVEYDFYNL NGEYGREVLKMYADNKTINSDKLHLDIYLFKS	>SA10_KQP37_08560_selw_NODE_7:c102602-101853 TTGGGGGAGTTTGAAGTTAAATATTTAACAGGATTTATTTTAATATTATTGTTAGAAGGAATTTTTACAA ATTCAGCAAGTGCAATCGAATATTCAGACTTACATCATAAAAGTAAACTAAATTCAAAGCGTCTAAGTAA TGCTAAGATGTCATTCATCAATCCAACTCAGCTTGAAAATAAAAACACAAACGATAGACTGTTGAAGCAT GATTTGTTATTTCATGACATGTTCGTAAATGATGATTGGAAAAAGGATTTTAAAGTTGAATTTGAAAATG AGGCACTTTCAAAGAAATTTATAAATAAGGATATCGATATATTTGCTGGAAGCTATAGCTATGAATGTCA…	738/750, 98% nt identity with KX655710.1; 245/250, 98% aa identity with ASK05481.1 (selw group 2); Aung et al., 2017	J3T01_07800*	>SA18_J3T01_07800*_selw*_NODE_1:92349-93098 TTGGGGGAGTTTGAAGTTAAATATTTAACAGGATTTATTTTAATATTATTGTTAGAAGGAATTTTTACAA ATTCAGCAAGTGCAATCGAATATTCAGACTTACATCATAAAAGTAAACTAAATTCAAAGCGTCTATATAA TGCTAAGGTGTCATTTGCTAATCCAACTGATCTTGAAAATAAAAACACAAACGATAGACTGTTGAAGCAT GATTTGTTATTTCATGACATGTTCGTAAATGTTGCTTCGAAAAAGGATTTTAAAGTTGAATTCGAAAATG AGGCACTTTCAAAGAAATTTATAAATAAGAATATCGATATATATGCTGGAAGCTATAGCTATGAATGTCA …	736/752, 98% nt identity with KX655714.1 (non functional selw group 4); Aung et al. 2017	>SA20_J3T02_07760_selw MGEFEVKYLTGFILILLLEGIFTNSASAIEYSDLHHKSKFDSKR LSNAKMSFINPTQLENKNTNDRLLKHDLLFHDMFVNDDWKKDFKVEFENEALSKKFIN KDIDIFAGNYGYGCHGGATNKTQCSYGGVTLSDNNKYDDYKNIPCNLWIDGHQTEIEL TAVKTKKKIVTIQELEVQLRNYLNEKYKLYEQGGDIVKGYVKYYNDDEQNVEYDFYNL NGEYGREVLKMYADNKTINSDKLHLDIYLFKS	>SA20_J3T02_07760_selw_NODE_4:c190762-190013 TTGGGGGAGTTTGAAGTTAAATATTTAACAGGATTTATTTTAATATTATTGTTAGAAGGAATTTTTACAA ATTCAGCGAGTGCAATCGAATATTCAGACTTACATCATAAAAGTAAGTTTGATTCAAAGCGTCTAAGTAA TGCTAAGATGTCATTCATCAATCCAACTCAGCTTGAAAATAAAAACACAAACGATAGACTGTTGAAGCAT GATTTGTTATTTCATGACATGTTCGTAAATGATGATTGGAAAAAGGATTTTAAAGTTGAATTTGAAAATG AGGCACTTTCAAAGAAATTTATAAATAAGGATATCGATATATTTGCTGGAAATTATGGATACGGATGTCA…	750/750, 100% nt identity with KX655710.1 (selw group 2); Aung et al., 2017	J3135_11035*	>SA24_J3135_11035*_selw*_NODE_2:45037-45786 TTGGGGGAGTTTGAAGTTAAATATTTAACAGGATTTATTTTAATATTATTGTTAGAAGGAATTTTTACAA ATTCAGCAAGTGCAATCGAATATTCAGACTTACATCATAAAAGTAAACTAAATTCAAAGCGTCTATATAA TGCTAAGTTGTCATTTGCTAATCCAACTGATCTTGAAAATAAAAACACAAACGATAGACTGTTAAAGCAT GATTTGTTATTTCATGACATGTTCGTAAATGTTGCTTCGAAAAAGGATTTTAAAGTTGAATTTGAAAATG AGGCACTTTCAAAGAAATTTATAAATAAGAATATCGATATATATGCTGGAAGCTATAGCTATGAATGTCA …	734/752, 98% nt identity with KX655714.1 (non functional selw group 4); Aung et al., 2017	>SA46_J3T00_11930_selw MGEFEVKYLTGFILILLLEGIFTNSASAIEYSDLHHKSKFDSKR LSNAKMSFINPNQLENKNTNDRLLKHDLLFHDMFVNDDWKKDFKVEFENEALSKKFIN KDIDIFAGNYGYGCHGGATNKTQCSYGGVTLSDNNKYDDYKNIPCNLWIDGHQAEIEL TAVKTKKKIVTIQELDVQLRNYLNEKYKLYEQGGDIVKGYVKYHYDDEQNVEYDFYNL NGEYGREVLKMYADNKTINSDKLHLDIYLFKS	>SA46_J3T00_11930_selw_NODE_8:46344-47093 TTGGGGGAGTTTGAAGTTAAATATTTAACAGGATTTATTTTAATATTATTGTTAGAAGGAATTTTTACAA ATTCAGCAAGTGCAATCGAATATTCAGACTTACATCATAAAAGTAAGTTTGATTCAAAGCGTCTAAGTAA TGCTAAGATGTCATTCATCAATCCAAATCAGCTTGAAAATAAAAACACAAACGATAGACTGTTGAAGCAT GATTTGTTATTTCATGACATGTTCGTAAATGATGATTGGAAAAAGGATTTTAAAGTTGAATTTGAAAATG AGGCACTTTCAAAGAAATTTATAAATAAGGATATCGATATATTTGCTGGAAATTATGGATACGGATGTCA TG…	745/750, 99% nt identity with KX655708.1; 246/250, 98% aa identity with ASK05479.1 (selw group 6); Aung et al., 2017	J3T04_12135*	>SA51_J3T04_12135*selw*_NODE_9:c107177..107927 TTGGGGGAGTTTGAAGTTAAATATTTAACAGGATTTATTTTAATATTATTGTTAGAAGGAATTTTTACAAATTCAGCGAGTGCAATCGAATATTCAGACTTACATCATAAAAGTAAGTTTGATTCAAAGCGTCTAAGTAATGCTAAGATGTCATTCATCAATCCAACTCAGCTTGAAAATAAAAACACAAACGATAGACTGTTGAAGCATGATTTGTTATTTCATGACATGTTCGTAAATGTTGCTTCGAAAAAGGATTTTAAAGTTGAATTCGAAAATGAGGCACTTTCAAAGAAATTTATAAATAAGAATATCGATATATATGCTGGAAGCTATAGCTATGAATGTCATG…	751/751, 100% identity with KX655714.1 (non functional selw group 4); Aung et al., 2017	>SA82_KQP39_08460_selw MGEFEVKYLTGFILILLLEGIFTNSASAIEYSDLHHKSELDSKR LYNAKVSFANPTQLENKKTNDRLLKHDLLFHDMFVNDAWKKDFKVEFENEALSKKFVN KDIDIFAGNYGYGCHGGETNKTLCSYGGVTLSDNNKYDDYKNIPCNLWIDGHQTGIEL TAVKTKKKIVTIQELDVQLRNYLNEKYKLYELGGDIVKGYVKYHNDDEKNVEYDFYNL NGEYGHEVLKMYADNKTINSDKLHLDIYLFKS	>SA82_KQP39_08460_selw_NODE_2:180833-181582 TTGGGGGAGTTTGAAGTTAAATATTTAACAGGATTTATTTTAATATTATTGTTAGAAGGAATTTTTACAA ATTCAGCAAGTGCAATCGAATATTCAGACTTACATCATAAAAGTGAACTTGATTCCAAGCGTCTATATAA TGCTAAGGTGTCATTTGCTAATCCAACTCAGCTTGAAAATAAAAAAACAAACGATAGACTGTTGAAGCAT GATTTGTTATTTCATGACATGTTCGTAAATGATGCTTGGAAAAAAGATTTTAAAGTTGAATTCGAAAATG AGGCACTTTCAAAGAAATTTGTAAATAAGGATATCGATATATTTGCTGGAAATTATGGATATGGATGTCA …	733/750, 98% identity with KX655717.1; 240/250, 96% aa identity with ASK05485.1 (selw group 1); Aung et al., 2017
Enterotoxin-like toxin X	selx	>SA01_KQP40_10740_selx MFKKYDSKNSIVLKSILSLGIIYGGTFGIYPNADASTQNSPSVQ DKQFQKVEEVPNNSEKALVKKLYDRYSKGTINGKSNKSRNWVYSERPLNENQVRIHLE GTYRVADRVYTPKRNITLNKEVVTLKELDHIIRFAHISYGLYMGEHLPKGNIVINTKD GGKYTLESHKELQKDRENVKINTADIKNVTFKLVKSVNDIEQV	>SA01_KQP40_10740_selx_NODE_6:c89657-89049 ATGTTCAAAAAATATGACTCAAAAAATTCAATCGTATTAAAATCTATTCTATCGCTAGGTATCATCTATG GGGGAACATTTGGAATATATCCAAATGCAGACGCGTCAACACAAAATTCCCCAAGTGTACAAGATAAACA ATTCCAAAAAGTTGAAGAAGTACCAAATAATTCAGAAAAAGCTTTGGTTAAAAAACTGTACGATAGATAC AGCAAGGGTACAATAAATGGAAAATCTAATAAATCTAGGAATTGGGTTTATTCAGAGAGACCTTTAAATG AAAATCAAGTTCGTATACATTTAGAAGGAACATACAGAGTTGCTGATAGAGTGTATACACCTAAGAGGAA C…	597/609, 98% nt identity with 363P_PDIT01000001.1:1440642-1441253 (selx1); 198/203, 98% aa identity with PGG73761.1; Chieffi et al., 2020. 203/203, 100% aa identity WP_000475328.1 (REFSEQ)	>SA02_3P54_05430_selx MFKKYDSKNSIVLKSILSLGIIYGGTFGIYPKADASTQNSSSVQ DKQLQKVEEVPNNSEKALVKKLYDRYSKDTINGKSNKSRNWVYSERPLNENQVRIHLE GTYTVADRVYTPKRNITLNKEVVTLKELDHIIRFAHISYGLYMGEHLPKGNIVINTKD GGKYTLESHKELQKDRENVKINTADIKNVTFKLVKSVNDIEQV	>SA02_3P54_05430_selx_NODE_4:c89448-88840 ATGTTCAAAAAATATGACTCAAAAAATTCAATCGTATTAAAATCTATTCTATCGCTAGGTATCATCTATG GGGGAACATTTGGAATATATCCAAAAGCAGACGCGTCAACACAAAATTCCTCAAGTGTACAAGATAAACA ATTACAAAAAGTTGAAGAAGTACCAAATAATTCAGAAAAAGCTTTGGTTAAAAAACTTTACGATAGATAC AGCAAGGATACAATAAATGGAAAATCTAATAAATCTAGGAATTGGGTTTATTCAGAGAGACCTTTAAATG AAAACCAAGTTCGTATACATTTAGAAGGAACATACACAGTTGCTGATAGAGTATATACACCTAAGAGAAA TA…	609/609, 100% nt identity with 363P_PDIT01000001.1:1440642-1441253 (selx1); Chieffi et al., 2020	>SA04_J3T03_07800_selx MFKKNDSKNSILLKSILSLGIIYGGTFGIYPKADASTQNSPSVQ DKQFQKVEEVPNNSEKALVKKLYDRYSQNTINGKSNKSRNWVYSERPLNENQVRINLE GTYRVADRVYTPKRNITLNKEVVTLKELDHIIRFAHISYGLYMGEHLPKGNIVINTKD GGKYTLESHKELQKDRENVKINTADIKNVTFKLVKSVNDIEQV	>SA04_J3T03_07800_selx_NODE_2:635308-635916 ATGTTCAAAAAAAATGACTCGAAAAATTCAATTCTATTAAAATCTATTCTATCGCTAGGTATCATCTATG GGGGAACATTTGGAATATATCCAAAAGCAGACGCGTCAACACAAAATTCCCCAAGTGTACAAGATAAACA ATTCCAAAAAGTTGAAGAAGTACCAAATAATTCAGAAAAAGCTTTGGTTAAAAAACTTTACGATAGATAC AGCCAAAATACAATAAACGGAAAATCTAATAAATCTAGGAATTGGGTTTATTCAGAGAGACCTTTAAATG AAAACCAAGTTCGTATAAATTTAGAAGGAACATACAGAGTTGCTGATAGAGTATATACACCTAAGAGAAA …	609/609, 100% nt identity with 211P_PDIV01000002.1:929376-929987 (selx5); Chieffi et al., 2020	>SA07_KQP41_02500_selx MFKKYDSKNSIVLKSILSLGIIYGGTFGIYPNADASTQNSPSVQ DKQFQKVEEVPNNSEKALVKKLYDRYSKGTINGKSNKSRNWVYSERPLNENQVRIHLE GTYRVADRVYTPKRNITLNKEVVTLKELDHIIRFAHISYGLYMGEHLPKGNIVINTKD GGKYTLESHKELQKDRENVKINTADIKNVTFKLVKSVNDIEQV	>SA07_KQP41_02500_selx_NODE_4:c89657-89049 ATGTTCAAAAAATATGACTCAAAAAATTCAATCGTATTAAAATCTATTCTATCGCTAGGTATCATCTATG GGGGAACATTTGGAATATATCCAAATGCAGACGCGTCAACACAAAATTCCCCAAGTGTACAAGATAAACA ATTCCAAAAAGTTGAAGAAGTACCAAATAATTCAGAAAAAGCTTTGGTTAAAAAACTGTACGATAGATAC AGCAAGGGTACAATAAATGGAAAATCTAATAAATCTAGGAATTGGGTTTATTCAGAGAGACCTTTAAATG AAAATCAAGTTCGTATACATTTAGAAGGAACATACAGAGTTGCTGATAGAGTGTATACACCTAAGAGGAA C…	597/609, 98% nt identity with 363P_PDIT01000001.1:1440642-1441253 (selx1); 198/203, 98% aa identity with PGG73761.1; Chieffi et al., 2020. 203/203, 100% aa identity WP_000475328.1 (REFSEQ)	>SA08_KQP42_02635_selx MFKKNDSKNSIVLKSILSLGIIYGGTFGIYPKADASTQNSSSVQ DKQLQKVEEVPNNSEKALVKKLYDRYSQNTINGKSNKSRNWVYSERPLNENQVRIHLE GTYRVADRVYTPKRNITLNKEIVTLKELDHIIRFAHISYGLYMGEHLPKGNIVINTKN GGKYTLESHKELQKDRENVKINTDDIKNVTFELVKSVNDIEQV	>SA08_KQP42_02635_selx_NODE_6:c43149-42541 ATGTTCAAAAAAAATGACTCGAAAAATTCAATCGTATTAAAATCTATTCTATCGCTAGGTATCATCTATG GGGGAACATTTGGAATATATCCAAAAGCAGACGCGTCAACACAAAATTCCTCAAGTGTACAAGATAAACA ATTACAAAAAGTTGAAGAAGTACCAAATAATTCAGAAAAAGCTTTGGTTAAAAAACTTTACGATAGATAC AGCCAAAATACAATAAACGGAAAATCTAATAAATCTAGGAATTGGGTTTATTCAGAGAGACCTTTAAATG AAAATCAAGTTCGTATACATTTAGAAGGAACATACAGAGTTGCTGATAGAGTGTATACACCTAAGAGGAA C…	608/609, 99% nt identity with HQ850971.1 (selx9); 203/203, 100% aa identity with AEI60188.1; Wilson et al., 2011	>SA10_KQP37_11560_selx MFKKYDSKNSIVLKSILSLGIIYGGTFGIYPKADASTQNSSSVQ DKQLQKVEEVPNNSEKVLVKKLYDRYSKDTINGKSNKSRNWVYSERPLNENQVRIHLE GTYTVAGRVYTPKRNITLNKEVVTLKELDHIIRFAHISYGLYMGEHLPKGNIVINTKD GGKYTLESHKELQKNRENVEINTDDIKNVTFELVKSVNDIEQV	>SA10_KQP37_11560_selx_NODE_2:224353-224961 ATGTTCAAAAAATATGACTCAAAAAATTCAATCGTATTAAAATCTATTCTATCGCTAGGTATCATCTATG GGGGAACATTTGGAATATATCCAAAAGCAGACGCGTCAACACAAAATTCCTCAAGTGTACAAGATAAACA ATTACAAAAAGTTGAAGAAGTACCAAATAATTCAGAAAAAGTTTTGGTTAAAAAACTTTACGATAGATAC AGCAAGGATACAATAAATGGAAAATCTAATAAATCTAGGAATTGGGTTTATTCAGAGAGACCTTTAAATG AAAACCAAGTTCGTATACATTTAGAAGGTACATACACAGTTGCTGGCAGAGTGTATACACCTAAGAGGAA …	602/609, 99% nt identity with AASB02000040.1:71002-71613 (selx3); 200/203, 99% aa identity with EES94307.1; Wilson et al., 2011. 100% aa identity with WP_043044760.1; Langley et al., 2017	>SA18_J3T01_04125_selx MFKKHHSKNSIVLKSILSLGIIYGGTFGIYPKADASTQNSSSVQ DKQLQKVEEVPNNSEKALVKKLYDRYSKDTINGKSNKSRNWVYSERPLNENQVRIHLE GTYRVADRVYTPKRNITLNKEVVTLKELDHIIRFAHISYGLYMGEHLPKGNIVINTKN GGKYTLESHKELQKDRENVKINTDDIKNVTFELVKSVNDIEQV	>SA18_J3T01_04125_selx_NODE_4_:c90308-89700 ATGTTCAAAAAACATCATTCGAAAAATTCAATCGTATTAAAATCTATTCTATCGCTAGGTATCATCTATG GGGGAACATTTGGAATATATCCAAAAGCAGACGCGTCAACACAAAATTCCTCAAGTGTACAAGATAAACA ATTACAAAAAGTTGAAGAAGTACCAAATAATTCAGAAAAAGCTTTGGTTAAAAAACTTTACGATAGATAC AGCAAGGATACAATAAATGGAAAATCTAATAAATCTAGGAATTGGGTTTATTCAGAGAGACCTTTAAATG AAAACCAAGTTCGTATACATTTAGAAGGAACATACAGAGTTGCTGATAGAGTGTATACACCTAAGAGGAA …	609/609, 100% nt identity with HQ850972.1 (selx bov2); Wilson et al., 2011	>SA20_J3T02_06705_selx MFKKYDSKNSIVLKSILSLGIIYGGTFGIYPKADASTQNSSSVQ DKQLQKVEEVPNNSEKALVKKLYDRYSKDTINGKSNKSRNWVYSERPLNENQVRIHLE GTYTVAGRVYTPKRNITLNKEVVTLKELDHIIRFAHISYGLYMGEHLPKGNIVINTKD GGKYTLESHKELQKDRENVKINTADIKNVTFKLVKSVNDIEQV	>SA20_J3T02_06705_selx_NODE_3:249238-249846 ATGTTCAAAAAATATGACTCAAAAAATTCAATCGTATTAAAATCTATTCTATCGCTAGGTATCATCTATG GGGGAACATTTGGAATATATCCAAAAGCAGACGCGTCAACACAAAATTCCTCAAGTGTACAAGATAAACA ATTACAAAAAGTTGAAGAAGTACCAAATAATTCAGAAAAAGCTTTGGTTAAAAAACTTTACGATAGATAC AGCAAGGATACAATAAATGGAAAATCTAATAAATCTAGGAATTGGGTTTATTCAGAGAGACCTTTAAATG AAAACCAAGTTCGTATACATTTAGAAGGAACATACACAGTTGCTGGCAGAGTGTATACACCTAAGAGGAA …	609/609, 100% nt identity with 372P_PDIU01000002.1:968304-968915 (selx2); Chieffi et al., 2020	>SA24_J3135_12840_selx MFKKNDSKNSILLKSILSLGIIYGGTFGIYPKADASTQNSPSVQ DKQFQKVEEVPNNSEKALVKKLYDRYSQNTINGKSNKSRNWVYSERPLNENQVRINLE GTYRVADRVYTPKRNITLNKEVVTLKELDHIIRFAHISYGLYMGEHLPKGNIVINTKD GGKYTLESHKELQKDRENVKINTADIKNVTFKLVKSVNDIEQV	>SA24_J3135_12840_selx_NODE_3:157907-158515 ATGTTCAAAAAAAATGACTCGAAAAATTCAATTCTATTAAAATCTATTCTATCGCTAGGTATCATCTATG GGGGAACATTTGGAATATATCCAAAAGCAGACGCGTCAACACAAAATTCCCCAAGTGTACAAGATAAACA ATTCCAAAAAGTTGAAGAAGTACCAAATAATTCAGAAAAAGCTTTGGTTAAAAAACTTTACGATAGATAC AGCCAAAATACAATAAACGGAAAATCTAATAAATCTAGGAATTGGGTTTATTCAGAGAGACCTTTAAATG AAAACCAAGTTCGTATAAATTTAGAAGGAACATACAGAGTTGCTGATAGAGTATATACACCTAAGAGAAA …	609/609, 100% nt identity with 211P_PDIV01000002.1:929376-929987 (selx5); Chieffi et al., 2020	>SA46_J3T00_04985_selx MFKKNDSKNSIVLKSILSLGIIYGGTFGIYPKADASTQNSSSVQ DKQLQKVEEVPNNSEKALVKKLYDRYSKDTINGKSNKSRNWVYSERPLNENQVRIHLE GTYRVADRVYTPKRNITLNKEVVTLKELDHIIRFAHISYGLYMGEHLPKGNIVINTKN GGKYTLESHKELQKDRENVKINTDDIKNVTFELVKSVNDIEQV	>SA46_J3T00_04985_selx_NODE_4:c97169-96561 ATGTTCAAAAAAAATGACTCGAAAAATTCAATCGTATTAAAATCTATTCTATCGCTAGGTATCATCTATG GGGGAACATTTGGAATATATCCAAAAGCAGACGCGTCAACACAAAATTCCTCAAGTGTACAAGATAAACA ATTACAAAAAGTTGAAGAAGTACCAAATAATTCAGAAAAAGCTTTGGTTAAAAAACTTTACGATAGATAC AGCAAGGATACAATAAATGGAAAATCTAATAAATCTAGGAATTGGGTTTATTCAGAGAGACCTTTAAATG AAAACCAAGTTCGTATACATTTAGAAGGAACATACAGAGTTGCTGATAGAGTGTATACACCTAAGAGGAA C…	605/609, 99% nt identity with CP002114.2:396778-397389 (selx12); 201/203, 99% aa identity with ADL22300.1; Chua et al., 2010; Wilson et al., 2011. 605/609, 99% nt identity with HQ850972.1 (selxbov2); 201/203, 99% aa identity with AEI60189.1 (Wilson et al., 2011); 203/203, 100% aa identity WP_000473943.1; Tuffs et al., 2017	>SA51_J3T04_06990_selx MFKKYDSKNSIVLKSILSLGIIYGGTFGIYPKADASTQNSSSVQ DKQLQKVEEVPNNSEKALVKKLYDRYSKDTINGKSNKSRNWVYSERPLNENQVRIHLE GTYTVADRVYTPKRNITLNKEVVTLKELDHIIRFAHISYGLYMGEHLPKGNIVINTKD GGKYTLESHKELQKDRENVKINTADIKNVTFKLVKSVNDIEQV	>SA51_J3T04_06990_selx_NODE_3:148799-149407 ATGTTCAAAAAATATGACTCAAAAAATTCAATCGTATTAAAATCTATTCTATCGCTAGGTATCATCTATG GGGGAACATTTGGAATATATCCAAAAGCAGACGCGTCAACACAAAATTCCTCAAGTGTACAAGATAAACA ATTACAAAAAGTTGAAGAAGTACCAAATAATTCAGAAAAAGCTTTGGTTAAAAAACTTTACGATAGATAC AGCAAGGATACAATAAATGGAAAATCTAATAAATCTAGGAATTGGGTTTATTCAGAGAGACCTTTAAATG AAAACCAAGTTCGTATACATTTAGAAGGAACATACACAGTTGCTGATAGAGTATATACACCTAAGAGAAA …	609/609, 100% nt identity with 363P_PDIT01000001.1:1440642-1441253 (selx1); Chieffi et al., 2020	>SA82_KQP39_09530_selx MFKKHHSKNSILLKSILSLGIIYSGSFGIYSKAGASTQNSSSLQ DKQFQKVEEVPNNSEKALVKKLYDRYSKNTINGKSNKSRNWVYSERPLNENQVRIHLE GTYTVADRVYTPKRNITLNKEVVTLKELDHIIRFAHISYGLYMGEHLPKGNIVINTKD GGKYTLESHKELQKDRENVKINTADIKNVTFDLVKSVNDIEQV	>SA82_KQP39_09530_selx_NODE_13:c22188-21580 ATGTTCAAAAAACATCATTCTAAAAATTCAATCTTATTAAAATCTATTCTATCGCTAGGTATCATCTATT CGGGATCATTTGGAATATATTCAAAAGCAGGCGCGTCAACACAAAATTCCTCAAGTTTACAAGATAAACA ATTCCAAAAAGTTGAAGAAGTACCAAATAATTCAGAAAAAGCTTTGGTTAAAAAACTGTACGATAGATAC AGCAAAAATACAATAAATGGAAAATCTAATAAATCTAGGAATTGGGTTTATTCAGAGAGACCTTTAAATG AAAATCAAGTTCGTATACATTTAGAAGGGACTTACACAGTTGCTGATAGAGTATATACACCTAAGAGGAA …	609/609, 100% nt identity with NZ_CP007659.1:388710-389321 (selx6); Sabirova et al., 2014; Wilson et al., 2011
Enterotoxin-like toxin 30	sel30	-	-	-	-	-	-	-	-	-	-	-	-	-	-	-	-	-	-	-	-	-	-	-	-	-	-	-	-	-	-	>SA51_J3T04_08740_sel30 MKELIVIVLLLSVSQIKDNTFQTSSEDLHHKSELSSLALNNMRH NYFHRWPPVKGENKITNDQFLANTLLFKDFLTNHQYYNDLLVQFNSKETTDKFKAKTV DIYGLAYGFQCNGGEPNKTNCIYGGLTTHEDNKLDKPKNVPINLWIDGAQKRVSLDKV KTDKKTVTIQELDAQARYFLQGEYLLYHNDSFGGKIQKGFIEFHDANGFEVSYDLFDV KGDYPDTQLRIYNDNKTISSKNLHIDIYLFTK	>SA51_J3T04_08740_sel30_NODE_24:c806-57 ATGAAAGAATTAATCGTCATTGTTTTACTTTTATCTGTATCACAAATAAAAGACAATACATTTCAAACTA GTTCAGAAGATTTGCATCATAAGTCCGAGTTGAGTTCTTTAGCATTAAATAACATGAGGCATAATTATTT TCATAGGTGGCCACCCGTGAAAGGAGAAAATAAAATTACTAATGATCAATTTTTAGCTAACACGTTACTA TTTAAAGATTTTTTGACTAACCATCAATATTATAATGATTTGTTAGTACAATTTAATTCAAAAGAAACTA CTGATAAATTTAAAGCAAAAACAGTAGATATATATGGATTAGCATATGGCTTCCAATGTAATGGAGGTGA ACCC…	750/750, 100% nt identity with UHBH01000001.1; Dicks et al., 2021	-	-	-
*pseudogene
References
[1] Dicks, J., Turnbull, J.D., Russell, J., Parkhill, J., Alexander, S. 2021. Genome sequencing of a historic Staphylococcus aureus collection reveals new enterotoxin genes and sheds light on the evolution and genomic organization of this key virulence gene family. J Bacteriol. 203(10), e00587-20. https://doi.org/10.1128/JB.00587-20.
[6] Jarraud, S., Peyrat, M.A., Lim, A., Tristan, A., Bes, M., Mougel, C., Etienne, J., Vandenesch, F., Bonneville, M., Lina, G. 2001. egc, a highly prevalent operon of enterotoxin gene, forms a putative nursery of superantigens in Staphylococcus aureus. J. Immunol., 166, 669-677. https://doi.org/10.4049/jimmunol.166.1.669
[7] Chieffi, D.; Fanelli, F.; Cho, G.-S.; Schubert, J.; Blaiotta, G.; Franz, C.M.A.P.; Bania, J.; Fusco, V. 2020. Novel insights into the enterotoxigenic potential and genomic background of Staphylococcus aureus isolated from raw milk. Food Microbiol., 90, 103482. https://doi.org/10.1016/j.fm.2020.103482
[14] Aung, M., San, T., Aye, M., Mya, S., Maw, W., Zan, K., Htut, W., et al. 2017. Prevalence and Genetic Characteristics of Staphylococcus aureus and Staphylococcus argenteus Isolates Harboring Panton-Valentine Leukocidin, Enterotoxins, and TSST-1 Genes from Food Handlers in Myanmar. Toxins, 9, 241. http://dx.doi.org/10.3390/toxins9080241
[15] Wilson, G.J., Seo, K.S., Cartwright, R.A., Connelley, T., Chuang-Smith, O.N., Merriman, J.A., Guinane, C.M., Park, J.Y., Bohach, G.A., Schlievert, P.M., Morrison, W.I., Fitzgerald, J.R. 2011. A novel core genome-encoded superantigen contributes to lethality of community-associated MRSA necrotizing pneumonia. PLoS Pathog. 7(10), e1002271. https://doi.org/10.1371/journal.ppat.1002271.
[17] Borst, D.W., Betley, M.J. 1994. Phage-associated differences in staphylococcal enterotoxin A gene (sea) expression correlate with sea allele class. Infect. Immun., 62, 113-118. https://doi.org/10.1128/iai.62.1.113-118.1994
[18] Johler, S., Sihto, H.-M., Macori, G., & Stephan, R. 2016. Sequence Variability in Staphylococcal Enterotoxin Genes seb, sec, and sed. Toxins, 8, 169. http://dx.doi.org/10.3390/toxins8060169
[19] Baba, T., Takeuchi, F., Kuroda, M., Yuzawa, H., Aoki, K., Oguchi, A., Nagai, Y., Iwama, N., Asano, K., Naimi, T., Kuroda, H., Cui, L., Yamamoto, K, Hiramatsu, K. 2002. Genome and virulence determinants of high virulence community-acquired MRSA. The Lancet, 359, 1819-1827. https://doi.org/10.1016/S0140-6736(02)08713-5
[20] Betley, M. J., Mekalanos, J. J. 1988. Nucleotide sequence of the type A staphylococcal enterotoxin gene. J. Bacteriol., 170, 34-41. https://doi.org/10.1128/jb.170.1.34-41.1988
[21] Chua, K., Seemann, T., Harrison, P.F., Davies, J.K., Coutts, S.J., Chen, H., Haring, V., Moore, R., Howden, B.P., Stinear, T.P. 2010. Complete Genome Sequence of Staphylococcus aureus Strain JKD6159, a Unique Australian Clone of ST93-IV Community Methicillin-Resistant Staphylococcus aureus. J. Bacteriol., 192, 5556-5557. https://doi.org/10.1128/JB.00878-10
[22] Collery, M.M., Smyth, C.J. 2007. Rapid differentiation of Staphylococcus aureus isolates harbouring egc loci with pseudogenes psient1 and psient2 and the selu or seluv gene using PCR-RFLP. J. Med. Microbiol. 56, 208-216. https://doi.org/10.1099/jmm.0.46948-0
[23] Egyir, B., Bentum, J., Attram, N., Fox, A., Obeng-Nkrumah, N., Appiah-Korang, L., Behene, E., Kumordjie, S., Yeboah, C., Agbodzi, B., Bentil, R.E., Tagoe, R., Kofi Adu Tabi, B., Owusu, F., Dayie, N.T.K.D., Donkor, E.S., Nsaful, J., Asah-Opoku, K., Nyarko, E., Asumanu, E., Larsen, A.R., Wolfe, D. M., Letizia, A. G. 2021. Whole Genome Sequencing and Antimicrobial Resistance of Staphylococcus a…
[24] Gawlik, D., Ruppelt-Lorz, A., Muller, E., Reißig, A., Hotzel, H., Braun, S.D., Söderquist, B., Ziegler-Cordts, A., Stein, C., Pletz, M. W., Ehricht, R., Monecke, S. 2020. Molecular investigations on a chimeric strain of Staphylococcus aureus sequence type 80. PLoS ONE, 15, e0232071. https://doi.org/10.1371/journal.pone.0232071
[25] Jørgensen, H.J., Mathisen, T., Lovseth, A., Omoe, K., Qvale, K.S., Loncarevic, S. 2005. An outbreak of staphylococcal food poisoning caused by enterotoxin H in mashed potato made with raw milk. FEMS Microbiol. Lett., 252, 267–272. https://doi.org/10.1016/j.femsle.2005.09.005
[26] Langley, R.J., Ting, Y.T., Clow, F., Young, P.G., Radcliff, F.J., Choi, J.M., Sequeira, R.P., Holtfreter, S., Baker, H., Fraser, J.D. 2017. Staphylococcal enterotoxin-like X (SElX) is a unique superantigen with functional features of two major families of staphylococcal virulence factors. PLoS Pathog., 13, e1006549. https://doi.org/10.1371/journal.ppat.1006549
[27] Sabirova, J.S., Xavier, B.B., Hernalsteens, J.P., De Greve, H., Ieven, M., Goossens, H., Malhotra-Kumar, S. 2014. Complete Genome Sequences of Two Prolific Biofilm-Forming Staphylococcus aureus Isolates Belonging to USA300 and EMRSA-15 Clonal Lineages. Genome Announc., 2, e00610-14. https://doi.org/10.1128/genomeA.00610-14
[28] Thomas, D.Y., Jarraud, S., Lemercier, B., Cozon, G., Echasserieau, K., Etienne, J., Gougeon, M.L., Lina, G., Vandenesch, F. 2006. Staphylococcal enterotoxin-like toxins U2 and V, two new staphylococcal superantigens arising from recombination within the enterotoxin gene cluster. Infect. Immun., 74, 4724-4734. https://doi.org/10.1128/IAI.00132-06
[29] Tuffs, S.W., James, D.B.A., Bestebroer, J., Richards, A.C., Goncheva, M.I., O'Shea, M., Wee, B.A., Seo, K.S., Schlievert, P.M., Lengeling,A., van Strijp, J.A., Torres, V.J., Fitzgerald, J.R. 2017. The Staphylococcus aureus superantigen SElX is a bifunctional toxin that inhibits neutrophil function. PLoS Pathog., 13, e1006461. https://doi.org/10.1371/journal.ppat.1006461
[30] Utter, B., Deutsch, D.R., Schuch, R., Winer, B.Y., Verratti, K., Bishop-Lilly, K., Sozhamannan, S., Fischetti, V.A. 2014. Beyond the Chromosome: The Prevalence of Unique Extra-Chromosomal Bacteriophages with Integrated Virulence Genes in Pathogenic Staphylococcus aureus. PLoS ONE, 9, E100502. https://doi.org/10.1371/journal.pone.0100502
[31] Wan TW, Liu YJ, Wang YT, Lin YT, Hsu JC, Tsai JC, Chiu HC, Hsueh PR, Hung WC, Teng LJ. Potentially conjugative plasmids harboring Tn6636, a multidrug-resistant and composite mobile element, in Staphylococcus aureus. J Microbiol Immunol Infect. 2022, 55(2):225-233. doi: 10.1016/j.jmii.2021.03.003.
