# Supplementary material for: First Genome-Based Characterisation and Staphylococcal Enterotoxin Production Ability of Methicillin-Susceptible and Methicillin-Resistant Staphylococcus aureus Strains Isolated from Ready-to-Eat Foods in Algiers (Algeria)
Source: Toxins (Basel). 2022 Oct 25;14(11):731. doi: 10.3390/toxins14110731 (PMC9694651; doi:10.3390/toxins14110731)
Supplement: Supplementary file 1 [file toxins-14-00731-s001.zip › Supplementary Table S8_Virulence determinants.xlsx]

## Sheet: Supplementary Table S6
Supplementary Table S8. Virulence determinants in S. aureus strains sequenced in this study
Virulence factors	related genes	SA01	SA02	SA04	SA07	SA08	SA10	SA18	SA20	SA24	SA46	ST51	ST82
Adherence (22 items)
Autolysin	atl	KQP40_04895	J3P54_09965	J3T03_11785	KQP41_08915	KQP42_12145	KQP37_01045	J3T01_01190	J3T02_01915	J3135_05765	J3T00_01700	J3T04_04470	KQP39_11020
Clumping factor A	clfA	KQP40_01460	J3P54_07110	J3T03_13020	KQP41_06830	KQP42_13035	KQP37_01930	J3T01_00215	J3T02_02870	J3135_02405	J3T00_00825	J3T04_03265	KQP39_06270
Clumping factor B	clfB	KQP40_08535	J3P54_01590	J3T03_05640	KQP41_01560	KQP42_08795*	KQP37_12455	J3T01_06200	J3T02_08790	J3135_00720	J3T00_03090	J3T04_01015	KQP39_10170
Collagen binding protein	cna	-	-	J3T03_05955*	-	-	-	-	-	-	-	-	KQP39_05845
		-	-	-	-	-	-	-	-	-	-	-	KQP39_09880
Elastin binding protein	ebp	KQP40_11595	J3P54_04015	J3T03_09570	KQP41_11110	KQP42_09950	KQP37_06895	J3T01_08410	J3T02_07150	J3135_11635	J3T00_10445	J3T04_07490	KQP39_00180
Extracellular adherence protein/MHC analogous protein	eap/map	KQP40_03385	J3P54_12465	J3T03_02835	KQP41_08390	KQP42_03985	KQP37_06425	J3T01_12310	J3T02_12100	J3135_06810	J3T00_12920	J3T04_10265	KQP39_12220
Fibronectin binding proteins	fnbA	KQP40_09220	J3P54_00890	J3T03_04950	KQP41_00875	KQP42_05790	KQP37_03990	J3T01_06910	J3T02_09940	J3135_00030	J3T00_13715	J3T04_00315	KQP39_12330
Fibronectin binding proteins	fnbB	KQP40_09225	J3P54_00885	J3T03_04945	KQP41_00870	KQP42_05795	KQP37_03985	J3T01_06915	J3T02_09945	J3135_00025	J3T00_13710	J3T04_00310	-
Ser-Asp rich fibrinogen-binding proteins	sdrC	KQP40_00225	J3P54_10455	J3T03_01340	KQP41_04520	KQP42_04830	KQP37_03150	J3T01_02510	J3T02_10365	J3135_08370	J3T00_07220*	J3T04_13605	KQP39_07420
Ser-Asp rich fibrinogen-binding proteins	sdrD	KQP40_00230	J3P54_10450	J3T03_01335	KQP41_04525	KQP42_04825	KQP37_03145	J3T01_02515	J3T02_10360	J3135_08365	J3T00_07215	J3T04_13600	KQP39_07415
Ser-Asp rich fibrinogen-binding proteins	sdrE	KQP40_00235	J3P54_10445	J3T03_01330	KQP41_04530	KQP42_04820	KQP37_03140	J3T01_02520	J3T02_10355	J3135_08360	J3T00_08535	J3T04_13595	KQP39_07410
Exoenzyme
Hyaluronate lyase	hysA	KQP40_02790	J3P54_09050	J3T03_04305	KQP41_09560	KQP42_07290	KQP37_00910	J3T01_10725	J3T02_05470	J3135_03595	J3T00_08905	J3T04_11355	KQP39_04140
		KQP40_05565	-	-	KQP41_12905	-	KQP37_05090	J3T01_13235	-
		-	-	-	-	-	KQP37_07130	-	-
		-	-	-	-	-	KQP37_07785	-	-
		-	-	-	-	-	KQP37_09360	-	-
Lipase	geh	KQP40_10995	J3P54_05680	J3T03_07550	KQP41_02755	KQP42_02885	KQP37_11310	J3T01_04370	J3T02_06455	J3135_12585	J3T00_05235	J3T04_06740	KQP39_09780
Lipase	lip	KQP40_08330	J3P54_01795	J3T03_05845	KQP41_01765	KQP42_08590	KQP37_12660	J3T01_05995	J3T02_08585	J3135_00925	J3T00_03295	J3T04_01220	KQP39_09965
Cysteine protease	sspB	KQP40_04865	J3P54_09995	J3T03_11815	KQP41_08885	KQP42_12175	KQP37_01075	J3T01_01220	J3T02_01945	J3135_05795	J3T00_01670	J3T04_04440	KQP39_10990
Cysteine protease	sspC	KQP40_04860	J3P54_10000	J3T03_11820	KQP41_08880	KQP42_12180	KQP37_01080	J3T01_01225	J3T02_01950	J3135_05800	J3T00_01665	J3T04_04435	KQP39_10985
Serine V8 protease	sspA	KQP40_04870	J3P54_09990	J3T03_11810	KQP41_08890*	KQP42_12170	KQP37_01070	J3T01_01215	J3T02_01940	J3135_05790	J3T00_01675	J3T04_04445	KQP39_10995
Serine protease	splA	KQP40_05635	J3P54_11715*	J3T03_00555	KQP41_12835	KQP42_01910	KQP37_07190	J3T01_13305	J3T02_10860	J3135_04295	J3T00_06030	J3T04_07770	-
Serine protease	splB	KQP40_05630	J3P54_11710	J3T03_00560	KQP41_12840	KQP42_01915	KQP37_07180	J3T01_13300	J3T02_10865	J3135_04300	J3T00_06035	J3T04_07765	-
		-	-	-	-	-	KQP37_07185	-	-	-	-	-	-
Serine protease	splC	KQP40_05625	J3P54_11705	J3T03_00565	KQP41_12845	KQP42_01920	KQP37_07175	J3T01_13295	J3T02_10870	J3135_04305	J3T00_06040	J3T04_07760	-
Serine protease	splD	KQP40_05620	J3P54_11700	J3T03_00570	KQP41_12850	KQP42_01925	KQP37_07165	J3T01_13290	J3T02_10875	J3135_04310	J3T00_06050	J3T04_07755	-
		-	-	-	-	-	-	-	-	J3135_04325	-	-	-
Serine protease	splE	KQP40_05610	-	J3T03_00580	KQP41_12860	KQP42_01935	KQP37_07160	J3T01_13280	J3T02_10885	J3135_04320	J3T00_06045	-	-
		-	-	-	-	-	KQP37_07170	-	-	-	-	-	-
Serine protease	splF	KQP40_05605	J3P54_11690	J3T03_00585	KQP41_12865	KQP42_01940	KQP37_07155	J3T01_13275	J3T02_10890	-	J3T00_06060	J3T04_07745	-
Staphylocoagulase	coa	KQP40_06185	J3P54_10690	J3T03_07075	KQP41_10200	KQP42_07490	KQP37_10820	J3T01_04845	J3T02_05960	J3135_01965	J3T00_03720	J3T04_02295	KQP39_02245
Staphylokinase	sak	-	-	J3T03_02805	-	KQP42_03950	KQP37_06395	J3T01_12280	-	J3135_06845	J3T00_12950	J3T04_10230	KQP39_12185
Thermonuclease	nuc	KQP40_01480	J3P54_02925	J3T03_10375	KQP41_03845	KQP42_10755	KQP37_01910	J3T01_00235	J3T02_00480	J3135_02385	J3T00_00845	J3T04_03285	KQP39_00980
		KQP40_09700	J3P54_07130	J3T03_13000	KQP41_06810	KQP42_13015	KQP37_08905	J3T01_09205	J3T02_02850	J3135_09840	J3T00_11250	J3T04_05090	KQP39_13430
Immune modulation
AdsA	adsA	KQP40_12350	J3P54_02130	J3T03_06175	KQP41_07115	KQP42_08275	KQP37_12995	J3T01_05645	J3T02_08225	J3135_01250	J3T00_03625	J3T04_01555	KQP39_10290
CHIPS	chp	KQP40_03410	-	-	KQP41_07650	KQP42_03960	-	-	-	J3135_06835	-	J3T04_10240	KQP39_12195
Capsule	capA	KQP40_12665	J3P54_08110	J3T03_06690	KQP41_10495	KQP42_07815	KQP37_13390	J3T01_05175	J3T02_05590	J3135_01595	J3T00_04015	J3T04_01895	KQP39_02540
	cap8B	KQP40_12670	J3P54_08115	J3T03_06695	KQP41_10500	KQP42_07820	KQP37_13395	J3T01_05180	J3T02_05595	J3135_01600	J3T00_04020	J3T04_01900	KQP39_02545
	cap8C	KQP40_12675	J3P54_08120	J3T03_06700	KQP41_10505	KQP42_07825	KQP37_13400	J3T01_05185	J3T02_05600	J3135_01605	J3T00_04025	J3T04_01905	KQP39_02550
	cap8D	KQP40_12680	J3P54_08125		KQP41_10510	KQP42_07830	KQP37_13405	J3T01_05190	J3T02_05605	J3135_01610	J3T00_04030	J3T04_01910	KQP39_02555
	cap8E	KQP40_12685	J3P54_08130		KQP41_10515	KQP42_07835	KQP37_13410	J3T01_05195	J3T02_05610	J3135_01615	J3T00_04035	J3T04_01915	KQP39_02560
	cap8F	KQP40_12690	J3P54_08135		KQP41_10520	KQP42_07840	KQP37_13415	J3T01_05200	J3T02_05615	J3135_01620	J3T00_04040	J3T04_01920	KQP39_02565
	cap8G	KQP40_12695	J3P54_08140		KQP41_10525	KQP42_07845	KQP37_13420	J3T01_05205	J3T02_05620	J3135_01625	J3T00_04045	J3T04_01925	KQP39_02570
	cap8H	KQP40_12700	J3P54_08145	J3T03_06710*	KQP41_10530	KQP42_07850	KQP37_13425	J3T01_05210	J3T02_05625	J3135_01630	J3T00_04050	J3T04_01930	KQP39_02575
	cap8I	KQP40_12705	J3P54_08150	J3T03_06715	KQP41_10535	KQP42_07855	KQP37_13430	J3T01_05215	J3T02_05630	J3135_01635	J3T00_04055	J3T04_01935	KQP39_02580
	cap8J	KQP40_12710	J3P54_08155	J3T03_06720	KQP41_10540	KQP42_07860	KQP37_13435	J3T01_05220	J3T02_05635	J3135_01640	J3T00_04060	J3T04_01940	KQP39_02585
	cap8K	KQP40_12715	J3P54_08160	J3T03_06725	KQP41_10545	KQP42_07865	KQP37_13440	J3T01_05225	J3T02_05640	J3135_01645	J3T00_04065	J3T04_01945	KQP39_02590
	cap8L	KQP40_12720	J3P54_08165	J3T03_06730	KQP41_10550	KQP42_07870	KQP37_13445	J3T01_05230	J3T02_05645	J3135_01650	J3T00_04070	J3T04_01950	KQP39_02595
	cap8M	KQP40_12725	J3P54_08170	J3T03_06735	KQP41_10555	KQP42_07875	KQP37_13450	J3T01_05235	J3T02_05650	J3135_01655	J3T00_04075	J3T04_01955	KQP39_02600
	capN	KQP40_12730	J3P54_08175	J3T03_06740	KQP41_10560	KQP42_07880	KQP37_13455	J3T01_05240	J3T02_05655	J3135_01660	J3T00_04080	J3T04_01960	KQP39_02605
	cap8O	KQP40_12735	J3P54_08180	J3T03_06745	KQP41_10565	KQP42_07885	KQP37_13460	J3T01_05245	J3T02_05660	J3135_01665	J3T00_04085	J3T04_01965	KQP39_02610
	cap8P	KQP40_12740	J3P54_08185	J3T03_06750	KQP41_10570	KQP42_07890	KQP37_13465	J3T01_05250	J3T02_05665	J3135_01670	J3T00_04090	J3T04_01970	KQP39_02615
SCIN	scn	KQP40_03405	-	J3T03_02815	KQP41_07645	KQP42_03965	KQP37_06405	J3T01_12290	-	J3135_06830	J3T00_12940	J3T04_10245	KQP39_12200
Sbi	sbi	KQP40_01710	J3P54_00450	J3T03_03710	KQP41_00445	KQP42_06185	KQP37_03565	J3T01_07310	J3T02_04360	J3135_09030	J3T00_10000	J3T04_12430	KQP39_02955
Fibrinogen binding protein	efb	KQP40_12860	J3P54_07615	J3T03_11250	KQP41_11440	KQP42_11610	KQP37_05470	J3T01_10175	J3T02_01380	J3135_05230	J3T00_02235	J3T04_05960	-
Exotoxin
Alpha hemolysin	hly/hla	KQP40_12880	J3P54_03770	J3T03_11230	KQP41_11460	KQP42_11590	KQP37_05450	J3T01_10155	J3T02_01360	J3135_05210	J3T00_02255	J3T04_05935	KQP39_01865
Beta hemolysin	hlb	KQP40_03415*	J3P54_12130*	J3T03_02525*	KQP41_07655*KQP41_07660*	KQP42_03595*	KQP37_06095*	J3T01_11970*	J3T02_12095	J3135_07150*	J3T00_07980*	J3T04_09910*	KQP39_11880*
Delta hemolysin	hld	KQP40_03485	J3P54_12075	J3T03_02435	KQP41_07725	KQP42_03530	KQP37_06030	J3T01_11895	J3T02_12005	J3135_07215	J3T00_08040	J3T04_09855	KQP39_11710
Gamma hemolysin	hlgA	KQP40_01705	J3P54_00455	J3T03_03715	KQP41_00450	KQP42_06180	KQP37_03570	J3T01_07305	J3T02_04355	J3135_09035	J3T00_10005	J3T04_12425	KQP39_02950*
Gamma hemolysin	hlgB	KQP40_01695	J3P54_00465	J3T03_03725	KQP41_00460	KQP42_06170	KQP37_03580	J3T01_07295	J3T02_04345	J3135_09045	J3T00_10015	J3T04_12415	KQP39_02940
Gamma hemolysin	hlgC	KQP40_01700	J3P54_00460	J3T03_03720	KQP41_00455	KQP42_06175	KQP37_03575	J3T01_07300	J3T02_04350	J3135_09040	J3T00_10010	J3T04_12420	KQP39_02945
Leukotoxin D	lukD	KQP40_05665	J3P54_11740	J3T03_00500	KQP41_12810	KQP42_01855	KQP37_07215	J3T01_13330	J3T02_10805	J3135_04270	J3T00_05975	J3T04_07795	-
Leukotoxin E	lukE	KQP40_05660	J3P54_11745	J3T03_00495	KQP41_12805	KQP42_01850	KQP37_07220*	J3T01_13335	J3T02_10800	J3135_04265	J3T00_05970	J3T04_07800	-
Panton-Valentine leukocidin	lukF-PV	-	-	-	-	-	-	-	-	-	J3T00_10390	-	-
Panton-Valentine leukocidin	lukS-PV	-	-	-	-	-	-	-	-	-	J3T00_10385	-	-
Exotoxin	set10	KQP40_10575	J3P54_05265	-	KQP41_02335	KQP42_02440	-	J3T01_03950	-	J3135_13040	J3T00_04785	J3T04_07155	KQP39_05595
Exotoxin	set11	-	J3P54_05260	-	-	-	-	-	-	-	-	J3T04_07160	-
Exotoxin	set12	KQP40_10560	J3P54_05255	-	KQP41_02320	KQP42_02430	-	J3T01_03940	-	-	-	J3T04_07165	-
Exotoxin	set13	-	J3P54_05250	-	-	KQP42_02425	-	-	-	-	-	J3T04_07170	KQP39_05605
Exotoxin	set14	-		-	-	-	-	-	-	-	-	-	-
Exotoxin	set15	-	J3P54_05225	-	-	KQP42_01965	-	-	-	J3135_13080	J3T00_04745	J3T04_07195	KQP39_05625
Exotoxin	set16	KQP40_10600	-	J3T03_07975	KQP41_02360	KQP42_02465	KQP37_11730	J3T01_03975	-	-	J3T00_04810	-	KQP39_05580
Exotoxin	set17	-	-	J3T03_07980	-	-	-	-	-	-	J3T00_04805	-	-
Exotoxin	set18	-	-	J3T03_07985	-	-	-	J3T01_03965	-	J3135_13025	-	-	-
Exotoxin	set19	KQP40_10580	-	-	KQP41_02340	KQP42_02445	-	J3T01_03955	-	-	J3T00_04790	-	-
Exotoxin	set1	-	-	-	-	-	-	-	-	-	-	-	KQP39_05600
Exotoxin	set20	-	-	J3T03_07990	-	-	KQP37_11755	-	-	-	-	-	-
Exotoxin	set21	KQP40_10570	-	J3T03_07995	KQP41_02330	-	-	-	J3T02_06875	-	-	-	-
Exotoxin	set22	KQP40_10565	-	J3T03_08000	KQP41_02325	KQP42_02435	KQP37_11760	J3T01_03945	-	J3135_13045	J3T00_04780	-	-
Exotoxin	set23	-	-	J3T03_08005	-	-	KQP37_11765	-	-	-	J3T00_04775	-	-
Exotoxin	set24	KQP40_10555	-	J3T03_08010	KQP41_02315	-	KQP37_11770	-	-	J3135_13055	J3T00_04770	-	-
Exotoxin	set25	KQP40_10550	-	J3T03_08015	KQP41_02310	KQP42_02420	-	J3T01_03930	-	J3135_13060	-	-	-
Exotoxin	set26	KQP40_10530	-	J3T03_08030	KQP41_02290	-	KQP37_11795	J3T01_03910	-	-	-	-	-
Exotoxin	set2	-	-	-	-	-	-	-	-	-	-	-	KQP39_05590
Exotoxin	set30	-	-	-	-	-	-	-	J3T02_06845	J3135_13015	-	-	-
Exotoxin	set31	-	-	-	-	KQP42_02460	KQP37_11735	-	J3T02_06850	J3135_13020	-	-	-
Exotoxin	set32	-	-	-	-	KQP42_02455	-	-	J3T02_06855	-	J3T00_04800	-	-
Exotoxin	set33	-	-	-	-	-	KQP37_11750	-	J3T02_06865	J3135_13035	-	-	-
Exotoxin	set34	-	-	-	-	-	-	-	J3T02_06870	-	-	-	-
Exotoxin	set35	-	-	-	-	-	-	-	-	-	-	-	-
Exotoxin	set36	-	-	-	-	-	-	-	J3T02_06880	-	-	-	-
Exotoxin	set37	-	-	-	-	-	-	-	J3T02_06885	J3135_13050	-	-	-
Exotoxin	set38	-	-	-	-	-	-	J3T01_03935	J3T02_06890	-	-	-	-
Exotoxin	set39	-	J3P54_05245	-	-	-	KQP37_11775	-	J3T02_06895	-	J3T00_04765	J3T04_07175	-
Exotoxin	set3	-	-	-	-	-	-	-	-	-	-	-	-
Exotoxin	set40	-	-	-	-	-	-	-	J3T02_10910	-	-	-	-
Exotoxin	set4	-	-	-	-	-	-	-	-	-	-	-	KQP39_05610
Exotoxin	set5	-	-	-	-	-	-	-	-	-	-	-	-
Exotoxin	set6	-	J3P54_05290	-	-	-	-	-	-	-	-	J3T04_07130	-
Exotoxin	set7	KQP40_10595	J3P54_05285	-	KQP41_02355	-	-	J3T01_03970	-	-	-	J3T04_07135	KQP39_05585
Exotoxin	set8	KQP40_10590	J3P54_05280	-	KQP41_02350	-	KQP37_11740	-	-	-	-	J3T04_07140	-
Exotoxin	set9	-	J3P54_05270	-	-	-	-	-	-	-	-	J3T04_07150	-
Staphylococcal protein A	spa	KQP40_12475	J3P54_02390*	J3T03_06485	KQP41_10760	KQP42_08090	KQP37_13195	J3T01_05445	J3T02_09385	J3135_01390	J3T00_04290	J3T04_01705	KQP39_10770
Toxic shock syndrome toxin	tsst	-	-	-	-	-	-	-	-	-	-	-	KQP39_11835
Biofilm
Intercellular adhesin	icaA	KQP40_08350	J3P54_01775	J3T03_05825	KQP41_01745	KQP42_08610	KQP37_12640	J3T01_06015	J3T02_08605	J3135_00905	J3T00_03275	J3T04_01200	KQP39_09985
Intercellular adhesin	icaB	KQP40_08340*	J3P54_01785	J3T03_05835	KQP41_01755*	KQP42_08600	KQP37_12650	J3T01_06005	J3T02_08595	J3135_00915	J3T00_03285	J3T04_01210	KQP39_09975
Intercellular adhesin	icaC	KQP40_08345*	J3P54_01790	J3T03_05840	KQP41_01760	KQP42_08595	KQP37_12655	J3T01_06000	J3T02_08590	J3135_00920	J3T00_03290	J3T04_01215	KQP39_09970
Intercellular adhesin	icaD	KQP40_08345	J3P54_01780	J3T03_05830	KQP41_01750	KQP42_08605	KQP37_12645	J3T01_06010	J3T02_08600	J3135_00910	J3T00_03280	J3T04_01205	KQP39_09980
Intercellular adhesin	icaR	KQP40_08355	J3P54_01770	J3T03_05820	KQP41_01740	KQP42_08615	KQP37_12635	J3T01_06020	J3T02_08610	J3135_00900	J3T00_03270	J3T04_01195	KQP39_09990
Effector delivery system
Type VII secretion system	esaA	KQP40_11205	J3P54_05860	J3T03_07360	KQP41_02990	KQP42_03085	KQP37_11115	J3T01_04545	J3T02_06260	J3135_12350	J3T00_05425	J3T04_06560	KQP39_01950
Type VII secretion system	esaB	KQP40_11195	J3P54_05850	J3T03_07370	KQP41_02980	KQP42_03075	KQP37_11125	J3T01_04535	J3T02_06270	J3135_12360	J3T00_05415	J3T04_06570	KQP39_01940
Type VII secretion system	esaD	-	J3P54_05815	J3T03_07405	-	KQP42_03040	KQP37_11160	J3T01_04500	J3T02_06305	J3135_12395	J3T00_05380	J3T04_06605	-
Type VII secretion system	esaE	-	J3P54_05825	J3T03_07395	-	KQP42_03050	KQP37_11150	J3T01_04510	J3T02_06295	J3135_12385	J3T00_05390	J3T04_06595	-
Type VII secretion system	esaG	KQP40_11085	J3P54_05770	J3T03_07410	KQP41_02845	KQP42_02975	KQP37_11165	J3T01_04460	J3T02_06310	J3135_12400	J3T00_05325	J3T04_06610	KQP39_09870
		KQP40_11090	J3P54_05775	J3T03_07425	KQP41_02850	KQP42_02980	KQP37_11180	J3T01_04465	J3T02_06330	J3135_12415	J3T00_05335	J3T04_06630	KQP39_09875
		KQP40_11095	J3P54_05780	J3T03_07430	KQP41_02855	KQP42_02985	KQP37_11210	J3T01_04470	J3T02_06335	J3135_12420	J3T00_05350	J3T04_06635	-
		KQP40_11100	J3P54_05785	J3T03_07435	KQP41_02860	KQP42_02990	KQP37_11215	J3T01_04475	J3T02_06345	J3135_12425	J3T00_05355	J3T04_06640	-
		KQP40_11130	J3P54_05790	J3T03_07440	KQP41_02890	KQP42_03020	KQP37_11220	J3T01_04495	J3T02_06350	J3135_12430	J3T00_05375	J3T04_06645	-
		KQP40_11135	J3P54_05810	J3T03_07445	KQP41_02895	KQP42_03035	-	-	J3T02_06355	J3135_12435	-	J3T04_06650	-
		KQP40_11140	-	J3T03_07450	KQP41_02900	-	-	-	J3T02_06360	J3135_12450	-	-	-
		-	-	J3T03_07455	KQP41_02915	-	-	-	J3T02_06365	J3135_12455	-	-	-
		-	-	J3T03_07460	KQP41_02920	-	-	-	-	J3135_12460	-	-	-
		-	-	-	KQP41_02925	-	-	-	-	J3135_12490	-	-	-
		-	-	-	-	-	-	-	-	J3135_12495	-	-	-
Type VII secretion system	essA	KQP40_11200	J3P54_05855	J3T03_07365	KQP41_02985	KQP42_03080	KQP37_11120	J3T01_04540	J3T02_06265	J3135_12355	J3T00_05420	J3T04_06565	KQP39_01945
Type VII secretion system	essB	KQP40_11190	J3P54_05845	J3T03_07375	KQP41_02975	KQP42_03070	KQP37_11130	J3T01_04530	J3T02_06275	J3135_12365	J3T00_05410	J3T04_06575	KQP39_01935
Type VII secretion system	essC	KQP40_11185	J3P54_05840	J3T03_07380	KQP41_02970	KQP42_03065	KQP37_11135	J3T01_04525	J3T02_06280	J3135_12370	J3T00_05405	J3T04_06580	KQP39_01930
Type VII secretion system	esxA	KQP40_11210	J3P54_05865	J3T03_07355	KQP41_02995	KQP42_03090	KQP37_11110	J3T01_04550	J3T02_06255*	J3135_12345	J3T00_05430	J3T04_06555	KQP39_01955
Type VII secretion system	esxB	-	J3P54_05830	J3T03_07390	-	KQP42_03055	KQP37_11145	J3T01_04515	J3T02_06290	J3135_12380	J3T00_05395	J3T04_06590	-
Type VII secretion system	esxC	-	J3P54_05835	J3T03_07385	-	KQP42_03060	KQP37_11140	J3T01_04520	J3T02_06285	J3135_12375	J3T00_05400	J3T04_06585	-
Type VII secretion system	esxD	-	J3P54_05820	J3T03_07400	-	KQP42_03045	KQP37_11155	J3T01_04505	J3T02_06300	J3135_12390	J3T00_05385	J3T04_06600	-
Additional
Cytolysin (Enterococcus)	cylR2	-	-	-	-	-	-	-	-	-	-	J3T04_08670	-
TDT family transporter	tdt	KQP40_12930	J3P54_03720	J3T03_11180	KQP41_11510	KQP42_11540	KQP37_05400	J3T01_10105	J3T02_01310	J3135_05160	J3T00_02305	J3T04_05885	KQP39_11845
TDT family transporter	tdt												KQP39_01815
von Willebrand factor binding protein Vwb	vwb	KQP40_01465	J3P54_07115	J3T03_13015	KQP41_06825	KQP42_13030	KQP37_01925	J3T01_00220	J3T02_02865	J3135_02400	J3T00_00830	J3T04_03270	KQP39_13445
Nutritional/Metabolic factor
Heme uptake system	isdA	KQP40_03255	J3P54_07765	J3T03_11400	KQP41_09300	KQP42_11760	KQP37_05620	J3T01_10325	J3T02_01530	J3135_05380	J3T00_02085	J3T04_06110	KQP39_11400
	isdB	KQP40_03250	J3P54_07770	J3T03_11405	KQP41_09295	KQP42_11765	KQP37_05625	J3T01_10330	J3T02_01535	J3135_05385	J3T00_02080	J3T04_06115	KQP39_11395
	isdC	KQP40_03260	J3P54_07760	J3T03_11395	KQP41_09305	KQP42_11755	KQP37_05615	J3T01_10320	J3T02_01525	J3135_05375	J3T00_02090	J3T04_06105	KQP39_11405
	isdD	KQP40_03265	J3P54_07755	J3T03_11390	KQP41_09310	KQP42_11750	KQP37_05610	J3T01_10315	J3T02_01520	J3135_05370	J3T00_02095	J3T04_06100	KQP39_11410
	isdE	KQP40_03270	J3P54_07750	J3T03_11385	KQP41_09315	KQP42_11745	KQP37_05605	J3T01_10310	J3T02_01515	J3135_05365	J3T00_02100	J3T04_06095	KQP39_11415
	isdF	KQP40_03275	J3P54_07745	J3T03_11380	KQP41_09320	KQP42_11740	KQP37_05600	J3T01_10305	J3T02_01510	J3135_05360	J3T00_02105	J3T04_06090	KQP39_11420
	isdG	KQP40_03285	J3P54_07735	J3T03_11370	KQP41_09330	KQP42_11730	KQP37_05590	J3T01_10295	J3T02_01500	J3135_05350	J3T00_02115	J3T04_06080	KQP39_11430
	isdH	KQP40_07185	J3P54_11295*	J3T03_08335	KQP41_06480*	KQP42_00750	KQP37_04700	J3T01_12860	J3T02_13280	J3135_04750	J3T00_06450	J3T04_09320	KQP39_07825
	isdI	KQP40_12745	J3P54_08190	J3T03_06755	KQP41_10490	KQP42_07810	KQP37_13470	J3T01_05170	J3T02_05670	J3135_01675	J3T00_04010	J3T04_01975	KQP39_02535
	srtB	KQP40_03280	J3P54_07740	J3T03_11375	KQP41_09325	KQP42_11735	KQP37_05595	J3T01_10300	J3T02_01505	J3135_05355	J3T00_02110	J3T04_06085	KQP39_11425
*pseudogene
