# Supplementary figures and images for: First Genome-Based Characterisation and Staphylococcal Enterotoxin Production Ability of Methicillin-Susceptible and Methicillin-Resistant Staphylococcus aureus Strains Isolated from Ready-to-Eat Foods in Algiers (Algeria)
Source: MDPI journal article supplement (doi:10.3390/toxins14110731), 2022-10-25

**SA02**

vSaß type I

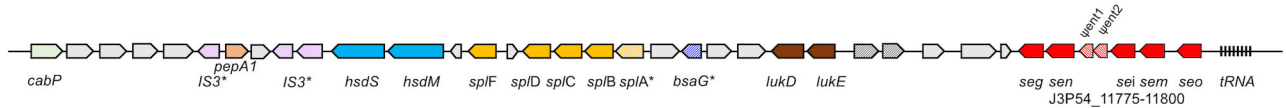

**SA51**

vSaß type I

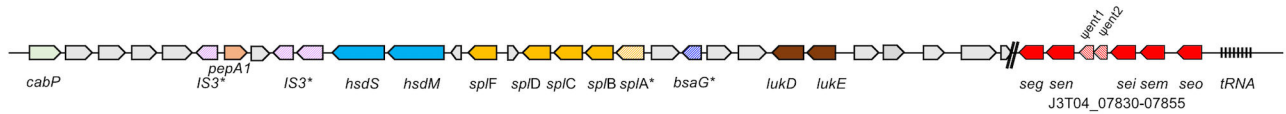

**SA24**

vSaß type I

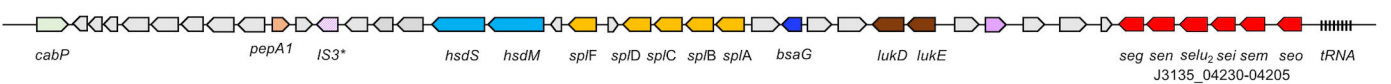

**SA08**

vSaß type IV

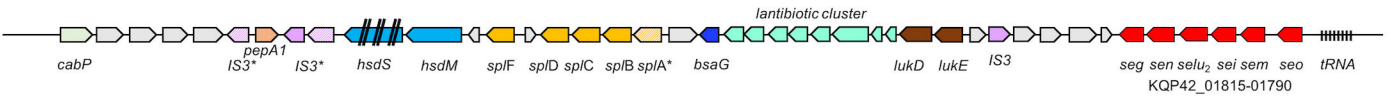

**SA82**

vSaß type III

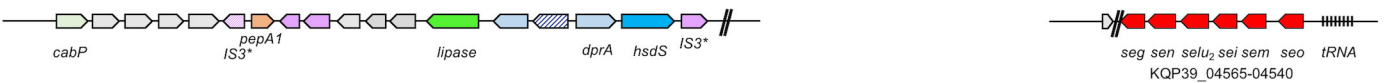

Supplement: s1 [file s1]

Tree scale: 0.1

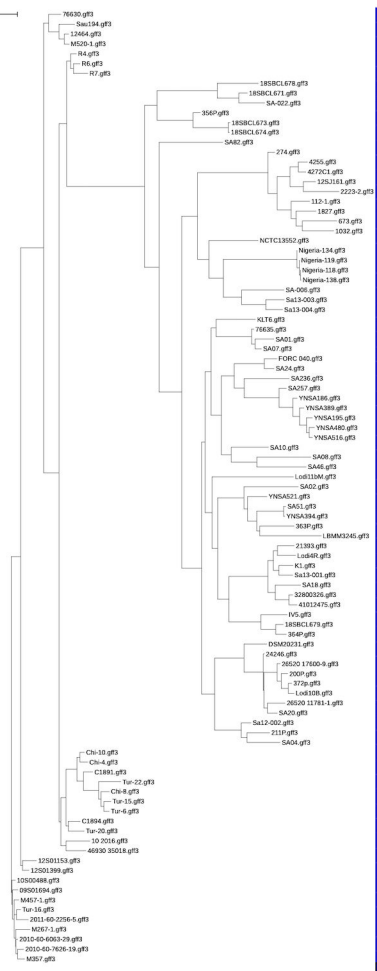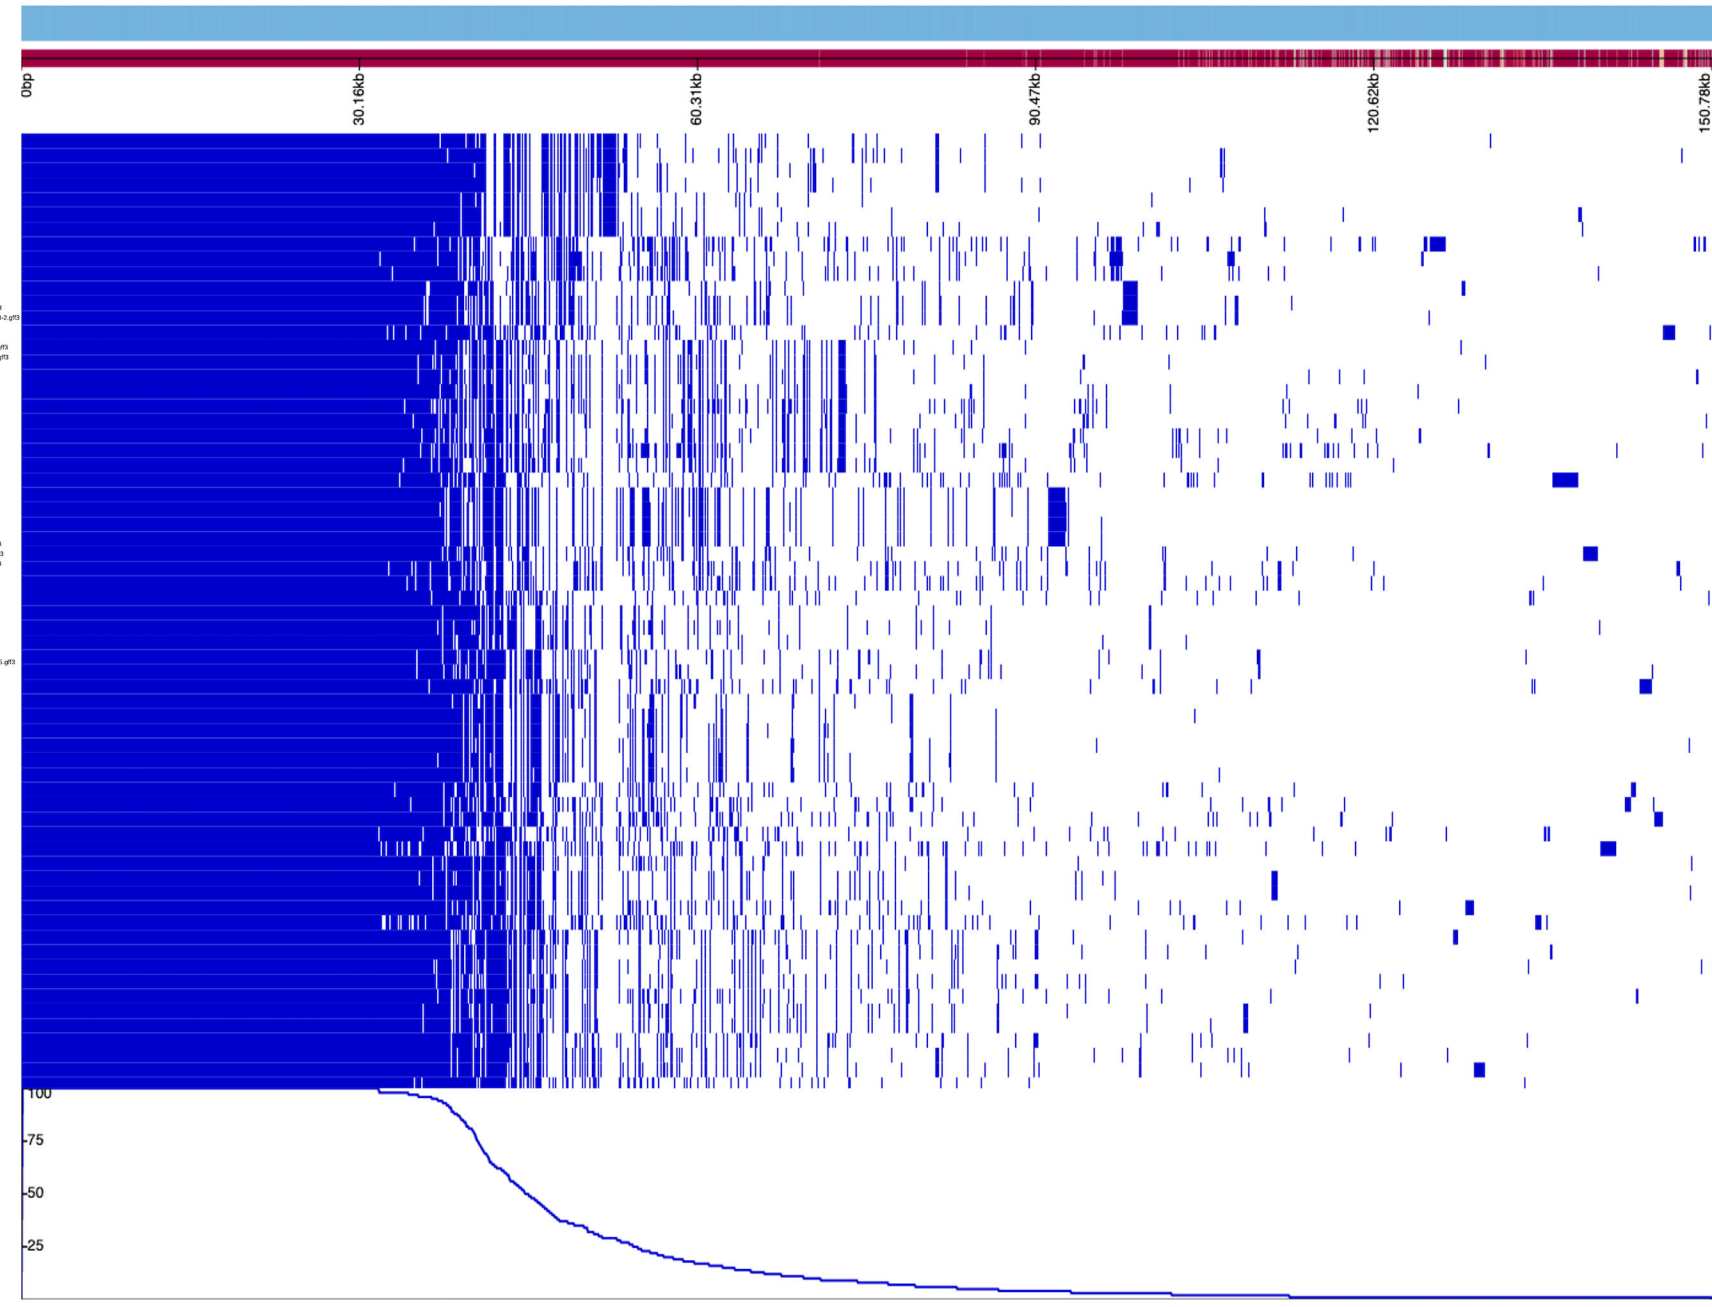

Supplement: s1 [file s1]
